# Supplementary material
Source: PubMed Central journal article supplement (PMC7365491)
Supplement: bmjopen-2020-040999.draft_revisions.pdf [file bmjopen-2020-040999.draft_revisions.pdf]

# BMJ Open

BMJ Open is committed to open peer review. As part of this commitment we make the peer review history of every article we publish publicly available.

When an article is published we post the peer reviewers' comments and the authors' responses online. We also post the versions of the paper that were used during peer review. These are the versions that the peer review comments apply to.

The versions of the paper that follow are the versions that were submitted during the peer review process. They are not the versions of record or the final published versions. They should not be cited or distributed as the published version of this manuscript.

BMJ Open is an open access journal and the full, final, typeset and author-corrected version of record of the manuscript is available on our site with no access controls, subscription charges or pay-per-view fees (<http://bmjopen.bmj.com>).

If you have any questions on BMJ Open's open peer review process please email [info.bmjopen@bmj.com](mailto:info.bmjopen@bmj.com)

# BMJ Open

**Advance Care Planning: Promoting Effective and Aligned  
Communication in the Elderly (ACP-PEACE)  
Design and rationale for a pragmatic stepped-wedge trial of  
older patients with cancer**

|                               |                                                                                                                                                                                                                                                                                                                                                                                                                                                                                                                                                                                                                                                                                                                                                                                                                                                                          |
|-------------------------------|--------------------------------------------------------------------------------------------------------------------------------------------------------------------------------------------------------------------------------------------------------------------------------------------------------------------------------------------------------------------------------------------------------------------------------------------------------------------------------------------------------------------------------------------------------------------------------------------------------------------------------------------------------------------------------------------------------------------------------------------------------------------------------------------------------------------------------------------------------------------------|
| Journal:                      | <i>BMJ Open</i>                                                                                                                                                                                                                                                                                                                                                                                                                                                                                                                                                                                                                                                                                                                                                                                                                                                          |
| Manuscript ID                 | bmjopen-2020-040999                                                                                                                                                                                                                                                                                                                                                                                                                                                                                                                                                                                                                                                                                                                                                                                                                                                      |
| Article Type:                 | Protocol                                                                                                                                                                                                                                                                                                                                                                                                                                                                                                                                                                                                                                                                                                                                                                                                                                                                 |
| Date Submitted by the Author: | 27-May-2020                                                                                                                                                                                                                                                                                                                                                                                                                                                                                                                                                                                                                                                                                                                                                                                                                                                              |
| Complete List of Authors:     | Lakin, Joshua R; Brigham and Women's Hospital and Harvard Chan School of Public Health,<br>Brannen, Elise; Dana Farber Cancer Institute, Psychosocial Oncology and Palliative Care<br>Tulsky, James A ; Dana Farber Cancer Institute,<br>Paasche-Orlow, Michael; Boston University School of Medicine/Boston Medical Center, General Internal Medicine<br>Lindvall, Charlotta ; Dana Farber Cancer Institute, Psychosocial Oncology and Palliative Care<br>Chang, Yuchiao; Massachusetts General Hospital, Department of Medicine; Harvard Medical School<br>Gundersen, Daniel A.; Dana Farber Cancer Institute, Survey and Data Management Core<br>El-Jawahri, Areej; Harvard Medical School; Massachusetts General Hospital, Hematology-Oncology<br>ACP Peace Investigators, The<br>Volandes, Angelo; Massachusetts General Hospital, Medicine; Harvard Medical School |
| Keywords:                     | PALLIATIVE CARE, ONCOLOGY, MEDICAL EDUCATION & TRAINING, Information management < BIOTECHNOLOGY & BIOINFORMATICS, Adult palliative care < PALLIATIVE CARE                                                                                                                                                                                                                                                                                                                                                                                                                                                                                                                                                                                                                                                                                                                |
|                               |                                                                                                                                                                                                                                                                                                                                                                                                                                                                                                                                                                                                                                                                                                                                                                                                                                                                          |

SCHOLARONE™  
Manuscripts

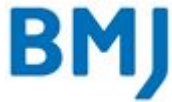

I, the Submitting Author has the right to grant and does grant on behalf of all authors of the Work (as defined in the below author licence), an exclusive licence and/or a non-exclusive licence for contributions from authors who are: i) UK Crown employees; ii) where BMJ has agreed a CC-BY licence shall apply, and/or iii) in accordance with the terms applicable for US Federal Government officers or employees acting as part of their official duties; on a worldwide, perpetual, irrevocable, royalty-free basis to BMJ Publishing Group Ltd ("BMJ") its licensees and where the relevant Journal is co-owned by BMJ to the co-owners of the Journal, to publish the Work in this journal and any other BMJ products and to exploit all rights, as set out in our [licence](#).

The Submitting Author accepts and understands that any supply made under these terms is made by BMJ to the Submitting Author unless you are acting as an employee on behalf of your employer or a postgraduate student of an affiliated institution which is paying any applicable article publishing charge ("APC") for Open Access articles. Where the Submitting Author wishes to make the Work available on an Open Access basis (and intends to pay the relevant APC), the terms of reuse of such Open Access shall be governed by a Creative Commons licence – details of these licences and which [Creative Commons](#) licence will apply to this Work are set out in our licence referred to above.

Other than as permitted in any relevant BMJ Author's Self Archiving Policies, I confirm this Work has not been accepted for publication elsewhere, is not being considered for publication elsewhere and does not duplicate material already published. I confirm all authors consent to publication of this Work and authorise the granting of this licence.

Original Article

**Advance Care Planning: Promoting Effective and Aligned Communication in the Elderly  
(ACP-PEACE)**

**Design and rationale for a pragmatic stepped-wedge trial of older patients with cancer**

**Running Title: The ACP-PEACE pragmatic stepped-wedge trial**

Joshua R Lakin, MD<sup>1,2</sup>; Elise N Brannen, BS, BA<sup>1</sup>; James A Tulsy, MD<sup>1,2</sup>; Michael K Paasche-Orlow, MD<sup>3</sup>; Charlotta Lindvall, MD, PhD<sup>1,2</sup>; Yuchiao Chang<sup>2,4</sup>; Daniel A. Gundersen<sup>5</sup>; Areej El-Jawahri MD<sup>2,6</sup>; The ACP-PEACE Investigators; Angelo Volandes, MD<sup>2,4</sup>

**Author Affiliations:**

<sup>1</sup>Department of Psychosocial Oncology and Palliative Care, Dana-Farber Cancer Institute, Boston, MA, USA

<sup>2</sup>Harvard Medical School, Boston, MA, USA

<sup>3</sup>Boston University School of Medicine, Section of General Internal Medicine, Boston Medical Center, Boston, MA, USA

<sup>4</sup>Department of Medicine, Massachusetts General Hospital, Boston, MA, USA

<sup>5</sup>Survey and Data Management Core, Dana-Farber Cancer Institute, Boston, Massachusetts, USA

<sup>6</sup>Hematology-Oncology, Massachusetts General Hospital, Boston, MA, USA

**Corresponding Author:**

Joshua R. Lakin, MD, Dana-Farber Cancer Institute, 450 Brookline Ave, D-216A, Boston, MA, USA

Email: [jlakin@partners.org](mailto:jlakin@partners.org)

**Collaborators:** The ACP-PEACE Investigators: Julie Goldman, MSW, MS; Brian Sipin, BSc; Michael J Barry, MD; Kathryn I Pollak, PhD; Miji Sofela, MBChB; Danielle Kennedy, MPH; S. Yousuf Zafar, MD; Maria Torroella Carney, MD; Diana Martins-Welch, MD; Michael Qiu, MD, PhD; Jody-Ann McLeggon, MPH; Craig E Devoe, MD; Jon C. Tilburt, MD; Charles L Loprinzi, MD; Parvez A. Rahman, MHI; Jeremiah J. Stout, BA; Aretha Delight Davis, MD, JD; Lisa M. Quintiliani, PhD

**Word Count:** 4448

1  
2  
3 **Keywords (3-10):** Advance Care Planning, Palliative Care, Shared Decision Making, Cancer,  
4  
5 Video Aids, Clinician Education, Communication, End-of-Life Care  
6

7  
8 **IRB Protocol Version:** 10  
9

10 **Funding:** Research reported in this publication was supported within the National Institutes of  
11 Health (NIH) Health Care Systems Research Collaboratory by cooperative agreement  
12 UH3AG060626 from the National Institute on Aging. This work also received logistical and  
13 technical support from the NIH Collaboratory Coordinating Center through cooperative  
14 agreement U24AT009676. The content is solely the responsibility of the authors and does not  
15 necessarily represent the official views of the National Institutes of Health.  
16  
17  
18  
19

20 **Patient and Public Involvement Statement:** Patients or the public were not involved in the  
21 design, or conduct, or reporting, or dissemination plans of our research.  
22  
23  
24  
25  
26  
27  
28  
29  
30  
31  
32  
33  
34  
35  
36  
37  
38  
39  
40  
41  
42  
43  
44  
45  
46  
47  
48  
49  
50  
51  
52  
53  
54  
55  
56  
57  
58  
59  
60

## ABSTRACT

**Introduction:** Advance Care Planning (ACP) is associated with improved health outcomes for patients with cancer and its absence is associated with unfavorable outcomes for patients and their caregivers. However, older adults do not complete ACP at expected rates due to patient and clinician barriers. We present the original design, methods, and rationale for a trial aimed at improving ACP for older patients with advanced cancer and the modified protocol in response to changes brought by the COVID-19 pandemic.

**Methods and Analysis:** The Advance Care Planning: Promoting Effective and Aligned Communication in the Elderly study is a pragmatic, stepped-wedge cluster randomized trial examining a Comprehensive ACP Program. The Program combines two complementary evidence-based interventions: clinician communication skills training (VitalTalk) and patient video decision aids (ACP Decisions). We will implement the Program at 36 oncology clinics across three unique U.S. health systems. Our primary outcome is the proportion of eligible patients with ACP documentation completed in the Electronic Health Record. Our secondary outcomes include resuscitation preferences, palliative care consultations, death, hospice use, and final cancer-directed therapy. From a subset of our patient population, we will collect surveys and video-based declarations of goals and preferences. We estimate 11,000 patients from the three sites will be enrolled in the study.

**Ethics and Dissemination:** Regulatory aspects of this trial include Institutional Review Board (IRB) approval via single IRB of record mechanism, Data Use Agreements among partners, and a Data Safety and Monitoring Board. We plan to present findings at national meetings and publish the results.

## ARTICLE SUMMARY: STRENGTHS AND LIMITATIONS

- The strengths of this study lie in its pragmatic design, allowing for “real world” evidence for two interventions that have been previously tested in more controlled settings.
- The stepped wedge design is practical and considered the design of choice when it is logistically impractical to simultaneously roll out the intervention to half of the clusters.
- The biggest limitation we are facing at this time has to do with the possible notable change in secular trends due to the Coronavirus Disease 2019 and the impact that has on ACP. To address this issue, we have adjusted our analysis plan to account for these changes.

## INTRODUCTION

More than half of newly diagnosed malignancies occur in patients over the age of 65<sup>1</sup> and that same population accounts for over two-thirds of all adult U.S. cancer deaths.<sup>2</sup> In addition to high mortality, older adults with cancer suffer disproportionately from receiving medical interventions that do not reflect their values and preferences.<sup>3-5</sup> Advance care planning (ACP) seeks to align medical care with patients' values and preferences.<sup>6, 7</sup> ACP is consistently associated with better outcomes<sup>8, 9</sup> while a lack of ACP is associated with greater use of unwanted medical interventions, more terminal hospitalizations, lower hospice use, higher healthcare costs, and worse bereavement outcomes.<sup>3, 10-14</sup> Despite evidence supporting ACP, participation rates remain low among older adults with serious illness, such as cancer.<sup>15</sup>

Effective ACP requires that patients experience accurate and comprehensible communication early in their illness,<sup>14, 16-18</sup> a collaborative effort requiring education for both patients and clinicians. Unfortunately, studies suggest that traditional written ACP can be ineffective in sufficiently informing patients and often occurs late in the disease process,<sup>19-24</sup> with the risk that patients' understanding is clouded by pain, medication, or psychological distress.<sup>10, 20, 25</sup> The heightened emotional state associated with hearing bad news late in a disease course interferes with patients' cognitive processing, and this reaction may be exacerbated by clinician inattention to affect.<sup>21, 26-29</sup> Patients assign considerable importance to their physicians' statements regarding ACP and the quality of communication<sup>30</sup> and while 90% of patients say they want to talk to their doctors about their stress and concerns,<sup>31, 32</sup> physicians generally, and oncologists specifically, often do not communicate effectively regarding ACP and end of life.<sup>30, 32-38</sup> Therefore, an effective intervention should both prepare patients for shared decision making and improve clinicians' communication skills.



1  
2  
3 We have developed a Comprehensive ACP Program to drive improved communication  
4 and ACP for an aging U.S. cancer population using a combination of empirically proven patient  
5 video decision aids and clinician communication skills training. This program integrates video  
6 decision aids for patients (ACP Decisions) and a clinician communication training program  
7 (VitalTalk) into 12 disease-based oncology clinics each across three health systems with the aim  
8 of improving conversations and documentation of ACP. By providing both patients and  
9 clinicians with the necessary tools and training, we create an inclusive approach to optimize ACP  
10 before the toughest choices arise for patients.  
11  
12  
13  
14  
15  
16  
17  
18  
19  
20

21 Most trials targeting older patients with serious illness evaluate interventions under ideal  
22 conditions and involve few facilities.<sup>39-42</sup> Thus, we need research for this population using  
23 pragmatic trials.<sup>43</sup> We sought to test this intervention in a manner that allows for improvements  
24 in processes as we learn them.<sup>44</sup> Advance Care Planning: Promoting Effective and Aligned  
25 Communication in the Elderly (ACP-PEACE) is a pragmatic stepped-wedge cluster randomized  
26 trial (SW-CRT) that conducts a real-world test of the Comprehensive ACP Program in older  
27 patients with cancer. In this paper, we present the design, methodology, and rationale for the  
28 ACP-PEACE trial and discuss our adjustments for the novel coronavirus COVID 19 pandemic.  
29  
30  
31  
32  
33  
34  
35  
36  
37  
38  
39  
40  
41

## 42 **METHODS**

### 43 **Overview**

44 We are studying the combination of clinician training and patient videos via a pragmatic  
45 SW-CRT and analyzing electronic health records (EHRs) for ACP outcomes for patients aged 65  
46 and older. Utilizing small sub-samples of patients, we will also assess patient-centered outcomes  
47 using surveys and video declarations in which patients discuss their values and preferences in  
48  
49  
50  
51  
52  
53  
54  
55  
56  
57  
58  
59  
60

1  
2  
3 their own words on video (Figure 1). We used the SPIRIT reporting guidelines for this  
4  
5 manuscript.<sup>45</sup>  
6  
7  
8  
9

## 10 **Study Timeline**

11  
12 The ACP-PEACE study has two phases, a characteristic of the funding mechanism. The  
13  
14 UG3 phase (year 1) of the study focused on developing and refining the intervention and data  
15  
16 acquisition. In this phase we established our organizational structure, developed the processes  
17  
18 and infrastructure needed to conduct the trial, and pilot-tested the study intervention in three  
19  
20 clinics, one from each participating health system. During the UH3 phase (years 2-5), we  
21  
22 planned to introduce the intervention to the 36 remaining oncology clinics in six-month waves;  
23  
24 two clinics per system for a total of six clinics every six months (Figure 2).  
25  
26  
27  
28  
29  
30

## 31 **Sites and randomization**

32  
33 We will draw participants from disease-based oncology clinics from three unique systems  
34  
35 - Duke Health (North Carolina), Mayo Clinic (Minnesota), and Northwell Health (New York).  
36  
37 These sites are geographically, socioeconomically, and culturally distinct. Each participating  
38  
39 clinic has more than one practicing oncologist and to be eligible for randomization, at least 30%  
40  
41 of the patient population must be age 65 or older.  
42  
43  
44

45 For the UH3 phase, we have identified a total of 36 oncology clinics (12 per site) as  
46  
47 candidate clinics based on recent data from each system. The pilot clinics that participated in the  
48  
49 UG3 phase tested the intervention process and will not be included in the final analysis. In the  
50  
51 UH3 phase, we will utilize stepped-wedge cluster randomization with the clinic as the unit of  
52  
53 randomization. With the clinic as the unit of randomization, we avoid the contamination that can  
54  
55  
56  
57  
58  
59  
60

1  
2  
3 occur when randomizing individuals within each clinic. The sequence of randomization was  
4 generated prior to initiation of the trial via random number generator. Every six months after the  
5 baseline, two clinics from each system will be randomized to the intervention. (Figure 3a)  
6  
7

8  
9  
10 During the original Step 2, COVID-19 spread throughout the country interrupting the  
11 stepped-wedge design in two key respects: (1) The team was unable to conduct the in-person  
12 trainings for the Step 2 intervention clinics; and, (2) ACP activities are likely to increase during  
13 this period due to a response to the pandemic, irrespective of the study. Upon the  
14 recommendation of the NIH Collaboratory Statistics Core, we modified the original design to  
15 “restart” the trial for the remaining 30 clinics using the original Step 2 as the new baseline. The  
16 training of the remaining 30 control clinics will be over four steps to keep the trial completion on  
17 the same overall timeline (Figure 3b).  
18  
19  
20  
21  
22  
23  
24  
25  
26  
27  
28  
29  
30

### 31 **Population**

32  
33 We will evaluate the outcomes for patients aged 65 or older with advanced cancer across  
34 all 36 clinics. As the intervention will be implemented clinic-wide, rather than targeted to  
35 specific study patients, all intervention clinic patients can receive the intervention. We will  
36 analyze data for patients with advanced cancer aged 65 or older; patients’ data will be counted  
37 towards control or intervention based on the allocation of each clinic at the end of each period of  
38 the stepped-wedge design. Therefore, a given patient could contribute data during more than one  
39 period and could contribute data to both control and intervention periods.  
40  
41  
42  
43  
44  
45  
46  
47  
48

49 During the UH3 years, research assistants at each site will conduct in-person surveys with  
50 450 randomly selected patients (150 per site) for our secondary exploratory patient-centered  
51 outcomes. Patients selected for surveys will be distributed evenly among clinics within each  
52  
53  
54  
55  
56  
57  
58  
59  
60

1  
2  
3 system and will include an equal number of surveys of patients from clinics in the control and  
4  
5 intervention phases. Patients will be surveyed only once as patients surveyed in the control phase  
6  
7 will be excluded from completing the later intervention survey. Additionally, from among this  
8  
9 group of 450 surveyed patients, a sub-group of 240 will be randomly selected and asked to  
10  
11 conduct a video declaration activity. All patients selected for surveys or videos will be excluded  
12  
13 from the primary study population to avoid bias rendered from additional contact with the study  
14  
15 team.  
16  
17  
18  
19  
20

### 21 **Intervention design, implementation, and adherence monitoring**

22  
23  
24 The Comprehensive ACP intervention combines VitalTalk and ACP Decisions, two  
25  
26 evidence-based interventions previously used separately, to create an innovative dual approach to  
27  
28 improving ACP. These interventions are complementary, as one targets improvement of  
29  
30 clinicians' skills and the other prepares patients for shared decision making. VitalTalk is the  
31  
32 most widely disseminated teaching method for effective communication skills training based on  
33  
34 practice and feedback on one's own communication skills. Supported by numerous previous  
35  
36 studies,<sup>46-52</sup> VitalTalk leverages didactics, demonstration, and small group sessions using role  
37  
38 play with trained actors portraying patients through which clinicians learn effective delivery of  
39  
40 serious news, prognosis discussion, early and late goals-of-care conversations. For this study, the  
41  
42 VitalTalk course will be a half-day session that teaches a framework for late goals-of-care  
43  
44 discussions, including skills around delivery of serious news, responding to emotion, assessing  
45  
46 prognostic awareness, identifying what is most important to patients, and making  
47  
48 recommendations.  
49  
50  
51  
52  
53  
54  
55  
56  
57  
58  
59  
60

1  
2  
3 The ACP Decisions program uses short video decision aids to address the most common  
4 issues facing older patients with serious illness. Videos in over 25 languages can be prescribed to  
5 patients and caregivers and are easily accessed in a mobile app or through a web-based platform.  
6  
7 The ACP Decisions videos have been shown to increase knowledge, decision certainty, and the  
8 stability of preferences over time, and to better inform the way that patients choose health care  
9 interventions towards the end of life.<sup>53-72</sup> The video collection includes certified video decision  
10 aids,<sup>73</sup> regarding ACP, advance directives, health care agents, goals of care, cardiopulmonary  
11 resuscitation, and hospice, that have been studied in a statewide implementation showing greater  
12 patient-aligned medical care.<sup>72</sup>

13  
14 We will provide in-person training every six months at each new clinic added to the  
15 intervention period of the trial. The Comprehensive ACP training program utilizes the VitalTalk  
16 methodology and infrastructure and the ACP Decisions Program tools to instruct clinicians and  
17 staff on how to (1) more effectively communicate with patients with cancer, (2) have ACP  
18 conversations with patients, (3) introduce the videos to patients and families, (4) use the videos  
19 as an adjunct to ACP counseling by clinicians, (5) select the appropriate video(s) according to  
20 patient needs, and (6) use the application or electronic platform for viewing videos. The  
21 combined program will involve a half-day face-to-face joint VitalTalk and ACP Decisions  
22 training. Any staff member affiliated with the selected facilities will be eligible to participate in  
23 training. As staff turnover among the sites is expected, training will be made available on an  
24 ongoing basis throughout the trial.

25  
26 Immediately following the initial training at each site, we will deploy the remainder of  
27 the intervention infrastructure. The ACP Decisions videos will be programmed into desktop  
28 devices, tablets, and password-protected electronic platforms of each health system's intranet.  
29  
30  
31  
32  
33  
34  
35  
36  
37  
38  
39  
40  
41  
42  
43  
44  
45  
46  
47  
48  
49  
50  
51  
52  
53  
54  
55  
56  
57  
58  
59  
60

1  
2  
3 When clinics initiate the intervention, they will implement the videos with all patients with  
4 flexibility as to which providers (physician, nurse, social worker) introduce the videos and  
5 exactly which videos are utilized to meet their patients' clinical needs. Additionally, the in-  
6 person clinician training will be supplemented with emails, pocket cards, offers of coaching, and  
7 online educational videos. The study team will facilitate dissemination of implementation  
8 successes and challenges via a learning network by conducting one-hour webinars at each of the  
9 practices randomized to the intervention every other month to discuss quality improvement  
10 activities relating to the study. The intensity of the VitalTalk training implementation will be  
11 assessed as the proportion of eligible staff trained, including new staff joining the practice over  
12 the implementation period. The intensity of implementation of the ACP Decisions videos will be  
13 assessed as the ratio of the number of videos viewed using the site-specific access codes captured  
14 at the ACP Decisions website to the number of eligible patients at each site for each six-month  
15 intervention period. Fidelity to the video component of the intervention will be monitored by  
16 tracking of video use (which videos are used at each clinic, playthrough rate, and frequency).  
17 Feedback on video viewing will be shared with each site at the end of each six-month  
18 implementation phase. Last, we aim to evaluate the impact of the study with a novel video  
19 declaration process, allowing patients to state their values and preferences in their own terms,  
20 which is described in detail in the Appendix.<sup>59</sup>

### 21 22 23 24 25 26 27 28 29 30 31 32 33 34 35 36 37 38 39 40 41 42 43 44 45 46 47 **Control condition**

48  
49 Clinics in the control phase will use whatever ACP procedures already exist in place at  
50 their respective system. Although current ACP-improvement initiatives may be present and vary  
51  
52  
53  
54  
55  
56  
57  
58  
59  
60

1  
2  
3 from clinic to clinic, this heterogeneity reflects the current dynamic state of “usual” care and is  
4  
5 therefore appropriate in this pragmatic trial.<sup>43</sup>  
6  
7

## 8 9 10 **Outcomes**

11  
12 The outcomes of the ACP-PEACE trial can be divided into three main categories:  
13  
14 patient-level, clinician-level, and system-level. Our primary outcome is the proportion of eligible  
15  
16 patients with ACP documentation completed in the EHR. Presence of completed ACP  
17  
18 documentation will be defined via one or both of the following two means: 1) Structured EHR  
19  
20 data: scanned forms including advance directives, living wills, or Physician’s Orders for Life  
21  
22 Sustaining Treatment (or state-specific equivalent) and code status orders indicating Do Not  
23  
24 Resuscitate Status (or similar site-specific codes for limitations on treatments) and 2) Natural  
25  
26 Language Processing (NLP) extraction (described below in detail): clinical documentation that  
27  
28 will include goals-of-care discussion, ACP, hospice discussion, discussion of palliative care, or  
29  
30 limitations on code status. From the EHR or the local tumor registry, we are also determining  
31  
32 demographic covariates and baseline data. Secondary outcomes include resuscitation  
33  
34 preferences, palliative care consultations, death, hospice use/utilization at the end of life, and  
35  
36 final cancer-directed therapy.  
37  
38  
39  
40  
41

42 We are deriving patient-centered outcomes from the patient survey and video  
43  
44 declarations. The surveys measure our patient-centered secondary outcomes such as patient  
45  
46 confidence that their future medical care will match their values, satisfaction with their  
47  
48 clinicians’ communication,<sup>74, 75</sup> satisfaction with their medical decision,<sup>76</sup> and regret about their  
49  
50 medical decision (Appendix).<sup>77, 78</sup> Finally, for each of the 450 surveyed patients who die during  
51  
52 the study period, we will extract data, via a chart abstraction tool, regarding ACP preferences and  
53  
54  
55  
56  
57  
58  
59  
60

care received in the final three months of life to explore whether patients receive goal-concordant care.

We are also collecting a small set of clinician data points. Participating clinicians provide information on demographics, clinical experience, prior communication training, and socioemotional orientation.<sup>52</sup> Table 1 lists each data element, with its purpose, proposed source, and the target population from whom we need the data for successful completion of the study. System-level data measurement will include measurement of the training and video use as described above as well as exploratory analysis of coaching calls and implementation activities.

**Table 1.** Data Elements and Outcomes

| Data Element                                   | Purpose                | Source                     | Population                                           |
|------------------------------------------------|------------------------|----------------------------|------------------------------------------------------|
| <b>A. Patient-Level</b>                        |                        |                            |                                                      |
| 1. Demographics                                | Covariate (moderator)  | EHR, Tumor Registry        | Entire study population                              |
| 2. ACP documents                               | 1 <sup>o</sup> outcome | EHR                        | Entire study population                              |
| 3. Resuscitation Preference                    | 2 <sup>o</sup> outcome | EHR                        | Entire study population                              |
| 4. Palliative care consults                    | 2 <sup>o</sup> outcome | EHR                        | Entire study population                              |
| 5. Hospice use/ Utilization at the end of life | 2 <sup>o</sup> outcome | EHR, Tumor Registry, Other | Entire study population – for those patients who die |
| 6. Final Cancer-Directed Therapy               | 2 <sup>o</sup> outcome | EHR, Tumor Registry        | Entire study population – for those patients who die |
| 7. Death                                       | Covariate              | EHR, Tumor Registry, Other | Entire study population                              |
| 8. Patient confidence                          | 2 <sup>o</sup> outcome | Survey                     | Subgroup of 450 patients                             |
| 9. Communication satisfaction                  | 2 <sup>o</sup> outcome | Survey                     | Subgroup of 450 patients                             |
| 10. Decisional satisfaction                    | 2 <sup>o</sup> outcome | Survey                     | Subgroup of 450 patients                             |
| 11. Decisional regret                          | 2 <sup>o</sup> outcome | Survey                     | Subgroup of 450 patients                             |
| 12. Family Communication                       | Exploratory            | Survey                     | Subgroup of 450 patients                             |
| 13. Goal-concordant care                       | Exploratory            | EHR                        | Subgroup of 450 patients                             |
| 14. Video declaration                          | Exploratory            | Video App                  | Subgroup of 240 patients                             |
| <b>B. Clinician-Level</b>                      |                        |                            |                                                      |
| 1. Demographic                                 | Covariate (moderator)  | Survey                     | All clinicians who participate                       |
| 2. Experience                                  | Covariate              | Survey                     | All clinicians who participate                       |
| 3. Communication training                      | Covariate              | Survey                     | All clinicians who participate                       |
| 4. Socioemotional Orientation                  | Covariate              | Survey                     | All clinicians who participate                       |
| <b>C. System-Level</b>                         |                        |                            |                                                      |
| 1. Practice variation                          | Exploratory            | Audio Record               |                                                      |
| 2. Leadership/Teamwork                         | Exploratory            | Audio Record               |                                                      |
| 3. Intervention/Video use                      | Monitoring fidelity    | Video App                  | Entire study population                              |



## Data sources, data elements, and linkage

Baseline (i.e., pre-intervention) data for all randomized clinics will include a six-month period prior to date of intervention delivery. Patients will be identified as having advanced cancer from each site's tumor registry and/or from clinical ICD codes, which have been studied in some cancers and have demonstrated strong specificities.<sup>79</sup> While these methods have lower sensitivity, they capture enough patients with advanced cancer with high specificity for outcome assessment without systematic bias towards intervention or control periods. Demographic information and baseline characteristics relevant to general oncology will be collected from the EHR. Our primary and secondary outcomes will be abstracted from the local EHRs and tumor registries as detailed below in outcomes.

We will also use NLP, a form of computer-assisted abstraction, to detect our primary and secondary outcomes. Our NLP software, ClinicalRegex, identifies predefined keywords or phrases within clinical notes, considering varieties in language and punctuation.<sup>80-82</sup> ClinicalRegex also allows for rapid semi-automated review that ensures that keywords have not been taken out of context. For each NLP process (i.e., goals-of-care discussion), we have built a keyword library that identifies relevant documentation within clinical notes. Each keyword library was refined and validated by manual review of clinical notes in local EHRs. With NLP, we will collect additional data on ACP documentation, goals-of-care discussions, limitation of life-sustaining treatment, palliative care consultation, and hospice assessment. Exploratory patient-centered outcomes and clinician outcomes will be derived from surveys collected through REDCap.<sup>83, 84</sup>

Data Use Agreements between all systems are on file and each site maintains and adheres to the process and procedures for the protection of human subjects and protected health

1  
2  
3 information (PHI) for their covered entities. Only the minimum amount of necessary PHI will be  
4  
5 collected from participants. HIPAA compliant and password protected servers will be used to  
6  
7 store all collected data. Individual password protected files will separate participant identifiers  
8  
9 and a third password protected linking file will be maintained. This linking file has restricted  
10  
11 access and utilizes a logging feature that identifies each user and instance of use. All data will be  
12  
13 transmitted via secure methods approved by the respective institutions to the Dana-Farber Cancer  
14  
15 Institute (DFCI) for data management and to Boston Medical Center for qualitative analysis and  
16  
17 trial investigators will have access to the final data set and it will be made available upon  
18  
19 reasonable request. The EHR data will undergo a review-adjudication process whereby DFCI  
20  
21 data staff and key, unblinded investigators, review the raw data for each variable to identify out  
22  
23 of range or unexpected values, a summary is sent to each site and conference calls are conducted  
24  
25 with relevant investigators and programmers to adjudicate any issues. We will also validate a  
26  
27 randomly selected subset of data, verifying key demographic characteristics and patient selection  
28  
29 criteria against medical records. The EHR data is then uploaded to a REDCap database.  
30  
31  
32  
33  
34  
35  
36  
37

### 38 **Masking**

39  
40 Blinding for this trial occurs at multiple levels. Research Co-Investigators at each site  
41  
42 will be aware of the randomization order as well as which clinics receive the intervention and  
43  
44 when. The investigators leading the trainings will likewise be aware of which clinics receive the  
45  
46 intervention. Similarly, due to their roles in working with the data and generating video  
47  
48 adherence reports for the intervention clinics, certain members of the implementation and data  
49  
50 management teams will be unblinded to clinic assignments and outcomes. All other staff will  
51  
52 remain blinded to randomization scheme and outcomes.  
53  
54  
55  
56  
57  
58  
59  
60

## Statistical Analysis

Our primary analytical approach uses an intention to treat analysis, with no special allowance for noncompliance or nonadherence. With the stepped-wedge design, the outcomes during the intervention (exposed) periods will be compared to outcomes during the control (unexposed) periods. We will conduct two analyses based on the observations included in the analysis: (1) Open cohort with repeated measures design: individuals may leave and others may join during the study and the same individuals are allowed to appear in multiple periods, (2) Repeated cross-sectional design: subjects will only be included in the period when they first enter the study. Characteristics of the individuals and clusters will be summarized by exposure status.<sup>85</sup> We will use generalized linear mixed models to compare outcomes between intervention and control periods. The basic model is depicted in this equation:

$$g(Y_{ijk}) = \mu + \alpha_i + \beta_j + \gamma_k + X_{ij}\theta$$

where  $Y_{ijk}$  denotes the response from individual  $k$  at time  $j$  from cluster  $i$ . To account for clustering within each clinic, the model includes a random effect  $\alpha_i$  for cluster  $i$ . Under the stepped wedge design, calendar time is associated with the exposure to the intervention. We will include a fixed effect  $\beta_j$  to adjust for potential confounding factors from calendar time. In the case that time effect might not be the same for all clusters, we will change the term from a fixed effect  $\beta_j$  to a random effect  $\beta_{ij}$ . To account for repeated measures from the same subject from the first analysis, we will include a random subject effect  $\gamma_k$ . The term  $X_{ij}$  represents the treatment indicator in cluster  $i$  at time  $j$  with  $\theta$  representing the overall treatment effect. If there is evidence of treatment effect heterogeneity, we will either change the fixed effect  $\theta$  to a random effect  $\theta_i$  or change the fixed effect  $\theta$  to  $\theta_{(s)}$  which allows different treatment effects for different strata. We will also explore heterogeneity of intervention effect for different subgroups by adding an

1  
2  
3 interaction term between treatment status and subgroup to the models. These groups include site,  
4 sex as a biological variable, race/ethnicity (white vs. non-white), and different types of cancer  
5 diagnoses.  
6  
7  
8  
9

10 If necessary, we will include additional terms  $\delta_1 Z_{ijk}$  and  $\delta_2 W_{ij}$  to the model, where  $Z$  and  
11  $W$  represent vectors of patient and cluster characteristics. The index  $j$  in the  $Z$  matrices allows us  
12 to include the time-varying covariates, which correspond to any patient characteristics that could  
13 change over time. We will use a logit link ( $g$ ) for the binary outcomes which include our primary  
14 outcome of ACP documentation and our secondary outcomes of resuscitation preference and  
15 hospice use. Other outcomes such as number of palliative care consults and utilizations are  
16 considered as Poisson variables and modeled with a log link.  
17  
18  
19  
20  
21  
22  
23  
24  
25

26 In adjustment for the COVID 19 pandemic, the analysis plan will remain the same for the  
27 data collected from the 30 clinics randomized to intervention after the original Step 2 (Figure  
28 3b). The data collected from the 6 clinics that received intervention during Step 1 will allow us to  
29 examine the ACP Program intervention effect prior to COVID-19 by comparing the ACP rates  
30 prior to the intervention (original baseline) and after the intervention (original Step 1).  
31 Additionally, ACP rates from original baseline, Step 1 and Step 2 from the 30 clinics randomized  
32 to intervention after the original Step 2 will be used to estimate the “COVID-19 effect” on ACP.  
33  
34  
35  
36  
37  
38  
39  
40  
41  
42

43 We also have patient-centered secondary outcomes from survey results for analysis.  
44 Since patients will be surveyed in the step immediately before and after the intervention is  
45 initiated within each clinic, the number of intervention and control patients will be approximately  
46 equal at each time point. We will use linear mixed models that treat time (i.e., before or after  
47 intervention) as a fixed effect and clinic as a random effect to account for clustering of patients  
48 within clinics.  
49  
50  
51  
52  
53  
54  
55  
56  
57  
58  
59  
60

1  
2  
3 Finally, we will examine care delivery alignment with expressed goals from a subset of  
4 deceased patients of those 450 surveyed. Using a chart abstraction tool, two blinded expert  
5 investigators will judge whether patients received care concordant with their documented wishes.  
6  
7 Coders will make determinations and discuss disagreements; final judgments will be determined  
8 by consensus. For qualitative coding evaluation, we will summarize the extent of agreement  
9  
10 using kappa statistics and will compare results between those who died before and after receiving  
11 interventions.  
12  
13  
14  
15  
16  
17  
18  
19  
20  
21

### 22 **Statistical power and sample size requirements**

23  
24 We used the Hooper et al.<sup>86, 87</sup> approach to conduct the power analysis. We originally  
25 estimated close to 5,000 patients from 36 oncology practices are eligible for the study at each  
26 time point and approximately 20% are new patients at each step. With 7 time points (baseline  
27 plus 6 steps), we anticipated a total of 11,000 unique patients will be included in the study. With  
28 the modified design, we estimate 4,160 patients from 30 oncology practices are eligible for the  
29 study at each time point and a total of 7,500 unique patients will be included in the stepped-  
30 wedge design analysis. With each clinic contributing an average of 139 patients at each step from  
31 the cohort design, the design effect due to clustering is 7.9 assuming an intra-cluster correlation  
32 of 0.05, and the design effect due to repeated assessment is 0.12 assuming the cluster  
33 autocorrelation coefficient is 0.7 and the individual autocorrelation coefficient is 0.9. These  
34 estimates correspond to an effective sample size (i.e., sample size required for individual  
35 randomization) of 4,405. For the repeated cross-sectional design, each clinic will contribute an  
36 average of 23 new patients at each step, and the effective sample size is 1,628 with the same  
37 assumptions on intra-cluster correlation and cluster autocorrelation. Preliminary estimates  
38  
39  
40  
41  
42  
43  
44  
45  
46  
47  
48  
49  
50  
51  
52  
53  
54  
55  
56  
57  
58  
59  
60

1  
2  
3 indicate the rate for ACP documentation (the primary outcome) ranges from 15% to 30% for the  
4  
5 control periods, which requires an effective sample size of 500 to 954 for detecting a 10%  
6  
7 absolute increase in our primary outcome with a two-sided significance level of 0.05. Therefore,  
8  
9 the study will have more than 90% power for either analysis using the open cohort with repeated  
10  
11 measures design or the repeated cross-sectional design.  
12  
13

14  
15 For the patient-centered survey outcomes, 225 patients will be surveyed during control  
16  
17 periods and 225 will be surveyed during intervention periods. Assuming an ICC of 0.05 and an  
18  
19 average cluster size of 12.5, the effective sample size is approximately 286. A sample of this size  
20  
21 allows for 90% power to detect a small to moderate effect size (Cohen's *d*) of 0.39 and 99%  
22  
23 power to detect a moderate effect size of 0.5 for outcomes such as patient confidence, decisional  
24  
25 satisfaction and regret.  
26  
27  
28  
29  
30

### 31 **Regulatory considerations**

32  
33 Regulatory aspects of this trial include Institutional Review Board (IRB) approval, Data  
34  
35 Use Agreements among partners, and an independent Data Safety and Monitoring Board. This  
36  
37 study was approved via a single IRB of record mechanism as a multi-center trial with the DFCI  
38  
39 as the lead site and registered on ClinicalTrials.gov (NCT03609177). Duke Health, Mayo Clinic,  
40  
41 and Northwell Health are participatory sites and Boston Medical Center and Massachusetts  
42  
43 General Hospital are non-participatory sites. Each site's own regulatory board established  
44  
45 official "reliance agreements" to use the DFCI's Office of Human Research Subjects (OHRS) as  
46  
47 their main regulatory agent. The three participating sites have formally designated via SMART  
48  
49 IRB that the IRB of record is the DFCI IRB and agree to follow the rules and regulations set  
50  
51 forth by the DFCI OHRS. All relevant parties are notified by email of any protocol  
52  
53  
54  
55  
56  
57  
58  
59  
60

1  
2  
3 modifications. This study presents minimal risk to participants. Investigators will monitor and  
4 report any unforeseen adverse events to the IRB. We have proactively requested an audit to be  
5 conducted by DFCI's OHRS before the trial end. Committees consisting of the various  
6 investigators oversee overall project direction and administration, intervention implementation,  
7 data quality and monitoring, stakeholder engagement, and regulatory and ethical considerations.  
8 Data Use Agreements between all systems are on file and each site maintains and adheres to the  
9 process and procedures for the protection of human subjects and PHI for their covered entities.  
10 Patients will be notified of the study and their participation via broadcast notifications in the  
11 form of posters in each of the clinics and will have the option to opt out. A waiver of consent  
12 was approved for the EHR review of the primary study subjects who are not contacted by study  
13 staff unless a specific research declination is on file at that site. Waivers of consent were also  
14 approved for engaging participating clinicians and surveyed patients not completing the video  
15 declaration as their participation is confidential and voluntary giving implied consent and there is  
16 minimal risk with the study. Those surveyed patients who also elect to complete the video  
17 declaration first need to sign an approved written consent form obtained by RAs at each site.  
18  
19  
20  
21  
22  
23  
24  
25  
26  
27  
28  
29  
30  
31  
32  
33  
34  
35  
36  
37  
38  
39

## 40 **RELEVANCE AND DISSEMINATION**

41  
42 The ACP-PEACE trial will be the first to study combining two evidence-based  
43 interventions in a pragmatic setting. The work combines clinician training in responding to  
44 emotion and handling difficult conversations with decision video aids for patients. The strengths  
45 of the study include the complementary nature of these approaches: targeting both clinicians and  
46 patients in a novel way. Additionally, the pragmatic nature of the trial allows us to collect  
47 evidence of the effect of these interventions in a "real-world" setting and provides rich  
48  
49  
50  
51  
52  
53  
54  
55  
56  
57  
58  
59  
60

1  
2  
3 information on the implementation of ACP interventions. This study has the potential to add to a  
4  
5 growing literature informing large systematic ways of improving ACP for older adults with  
6  
7 cancer. We plan to publish the primary outcome related to ACP documentation and our  
8  
9 secondary outcomes in a single paper. We will also perform further analyses of our NLP  
10  
11 methods, exploratory outcomes, chart review, implementation outcomes, and video declarations  
12  
13 and present these in publication and at national meetings.  
14  
15  
16  
17  
18  
19  
20  
21  
22  
23  
24  
25  
26  
27  
28  
29  
30  
31  
32  
33  
34  
35  
36  
37  
38  
39  
40  
41  
42  
43  
44  
45  
46  
47  
48  
49  
50  
51  
52  
53  
54  
55  
56  
57  
58  
59  
60



1  
2  
3 **Acknowledgements:** We would like to thank the participating oncology teams at each of our  
4  
5 three sites.  
6  
7

8 **Conflict of Interest Disclosures:** Dr. Lakin receives funding from the Cambia Health  
9  
10 Foundation as part of the Sojourns Scholars Leadership Program. Dr. Barry receives grant  
11  
12 support through Massachusetts General Hospital from Healthwise, a nonprofit patient education  
13  
14 and decision support organization. Dr. Davis is the CEO of ACP Decisions, a non-profit private  
15  
16 foundation. Dr. Tulsky is a Founding Director of VitalTalk, a non-profit organization focused on  
17  
18 clinician communication skills training, from which he receives no compensation. Dr. Volandes  
19  
20 has a financial interest in ACP Decisions Nous, a non-profit organization developing ACP video  
21  
22 decision support tools. His interests were reviewed and are managed by Massachusetts General  
23  
24 Hospital and Partners HealthCare in accordance with their conflict of interest policies.  
25  
26  
27  
28  
29

### 30 **Author Contributions**

31  
32 Study concept and design: Angelo Volandes, James Tulsky  
33

34 Acquisition of data: Joshua Lakin, Elise Brannen, Charlotta Lindvall, Dan Gundersen, The ACP-  
35  
36 Peace Investigators  
37

38  
39 Analysis and interpretation of data: Joshua Lakin, Charlotta Lindvall, Dan Gundersen, Yuchiao  
40  
41 Chang, James Tulsky, Michael Paasche-Orlow, Areej El-Jawahri, Angelo Volandes  
42

43 Drafting of the manuscript: Joshua Lakin, Elise Brannen, James Tulsky, Michael Paasche-Orlow,  
44  
45 Charlotta Lindvall, Yuchiao Chang, Daniel Gundersen, Areej El-Jawahri, The ACP-PEACE  
46  
47 Investigators, Angelo Volandes  
48  
49

50 Critical revision of the manuscript for important intellectual content: Joshua Lakin, Elise  
51  
52 Brannen, Angelo Volandes  
53  
54

55 Statistical analysis: Yuchiao Chang  
56  
57  
58  
59  
60

1  
2  
3 Obtained funding: Angelo Volandes, James Tulskey  
4

5 Administrative, technical, or material support: Elise Brannen, The ACP-PEACE Investigators  
6

7  
8 Study supervision: Angelo Volandes, James Tulskey  
9  
10  
11  
12  
13  
14  
15  
16  
17  
18  
19  
20  
21  
22  
23  
24  
25  
26  
27  
28  
29  
30  
31  
32  
33  
34  
35  
36  
37  
38  
39  
40  
41  
42  
43  
44  
45  
46  
47  
48  
49  
50  
51  
52  
53  
54  
55  
56  
57  
58  
59  
60

For peer review only

## REFERENCES

1. Berger NA, Savvides P, Koroukian SM, et al. Cancer in the elderly. *Trans Am Clin Climatol Assoc* 2006;117:147-55; discussion 55-6. [published Online First: 2008/06/06]
2. Howlader NA, Krapcho M, Miller D, et al. SEER Cancer Statistics Review, 1975-2013, National Cancer Institute.
3. Ahronheim JC, Morrison RS, Baskin SA, et al. Treatment of the dying in the acute care hospital. Advanced dementia and metastatic cancer. *Arch Intern Med* 1996;156(18):2094-100. [published Online First: 1996/10/14]
4. Earle CC, Landrum MB, Souza JM, et al. Aggressiveness of cancer care near the end of life: is it a quality-of-care issue? *J Clin Oncol* 2008;26(23):3860-6. doi: 10.1200/JCO.2007.15.8253 [published Online First: 2008/08/09]
5. Earle CC, Neville BA, Landrum MB, et al. Trends in the aggressiveness of cancer care near the end of life. *J Clin Oncol* 2004;22(2):315-21. doi: 10.1200/JCO.2004.08.136 [published Online First: 2004/01/15]
6. Aitken PV, Jr. Incorporating advance care planning into family practice [see comment]. *Am Fam Physician* 1999;59(3):605-14, 17-20. [published Online First: 1999/02/25]
7. Tulskey JA. Improving quality of care for serious illness: findings and recommendations of the Institute of Medicine report on dying in America. *JAMA Intern Med* 2015;175(5):840-1. doi: 10.1001/jamainternmed.2014.8425 [published Online First: 2015/03/03]
8. Mack JW, Weeks JC, Wright AA, et al. End-of-life discussions, goal attainment, and distress at the end of life: predictors and outcomes of receipt of care consistent with preferences. *Journal of clinical oncology : official journal of the American Society of Clinical Oncology* 2010;28(7):1203-8. doi: 10.1200/jco.2009.25.4672 [published Online First: 2010/02/04]
9. Wright AA, Zhang B, Ray A, et al. Associations between end-of-life discussions, patient mental health, medical care near death, and caregiver bereavement adjustment. *JAMA : the journal of the American Medical Association* 2008;300(14):1665-73. doi: 10.1001/jama.300.14.1665 [published Online First: 2008/10/09]
10. Bernacki RE, Block SD, American College of Physicians High Value Care Task F. Communication about serious illness care goals: a review and synthesis of best practices. *JAMA Intern Med* 2014;174(12):1994-2003. doi: 10.1001/jamainternmed.2014.5271 [published Online First: 2014/10/21]
11. Mitchell SL, Kiely DK, Hamel MB. Dying with advanced dementia in the nursing home. *Arch Intern Med* 2004;164(3):321-6. doi: 10.1001/archinte.164.3.321 [published Online First: 2004/02/11]
12. Mitchell SL, Teno JM, Kiely DK, et al. The clinical course of advanced dementia. *N Engl J Med* 2009;361(16):1529-38. doi: 10.1056/NEJMoa0902234 [published Online First: 2009/10/16]
13. Thorne SE, Bultz BD, Baile WF, et al. Is there a cost to poor communication in cancer care?: a critical review of the literature. *Psychooncology* 2005;14(10):875-84; discussion 85-6. doi: 10.1002/pon.947 [published Online First: 2005/10/04]
14. Office of the Assistant Secretary for Planning and Evaluation. U.S. Department of Health and Human Services. Advance directives and advance care planning: Report to Congress, 2008.

15. Heyland DK, Barwich D, Pichora D, et al. Failure to engage hospitalized elderly patients and their families in advance care planning. *JAMA Intern Med* 2013;173(9):778-87. doi: 10.1001/jamainternmed.2013.180 [published Online First: 2013/04/03]
16. Emanuel LL, Barry MJ, Stoeckle JD, et al. Advance directives for medical care--a case for greater use. *The New England journal of medicine* 1991;324(13):889-95. doi: 10.1056/nejm199103283241305 [published Online First: 1991/03/28]
17. Emanuel LL, von Gunten CF, Ferris FD. Advance care planning. *Arch Fam Med* 2000;9(10):1181-7. [published Online First: 2000/12/15]
18. Morrison RS, Meier DE. High rates of advance care planning in New York City's elderly population. *Arch Intern Med* 2004;164(22):2421-6. doi: 10.1001/archinte.164.22.2421 [published Online First: 2004/12/15]
19. Billings JA. The need for safeguards in advance care planning. *J Gen Intern Med* 2012;27(5):595-600. doi: 10.1007/s11606-011-1976-2 [published Online First: 2012/01/13]
20. Billings JA, Bernacki R. Strategic targeting of advance care planning interventions: the Goldilocks phenomenon. *JAMA internal medicine* 2014;174(4):620-4. doi: 10.1001/jamainternmed.2013.14384 [published Online First: 2014/02/05]
21. Fagerlin A, Schneider CE. Enough. The failure of the living will. *Hastings Cent Rep* 2004;34(2):30-42. [published Online First: 2004/05/26]
22. Lakin JR, Block SD, Billings JA, et al. Improving Communication About Serious Illness in Primary Care: A Review. *JAMA internal medicine* 2016;176(9):1380-7. doi: 10.1001/jamainternmed.2016.3212 [published Online First: 2016/07/12]
23. Loewenstein G. Hot-cold empathy gaps and medical decision making. *Health Psychol* 2005;24(4S):S49-56. doi: 10.1037/0278-6133.24.4.S49 [published Online First: 2005/07/28]
24. Winter L, Parks SM, Diamond JJ. Ask a different question, get a different answer: why living wills are poor guides to care preferences at the end of life. *Journal of palliative medicine* 2010;13(5):567-72. doi: 10.1089/jpm.2009.0311 [published Online First: 2010/04/10]
25. Patel K, Janssen DJ, Curtis JR. Advance care planning in COPD. *Respirology* 2012;17(1):72-8. doi: 10.1111/j.1440-1843.2011.02087.x [published Online First: 2011/10/20]
26. Davison SN, Simpson C. Hope and advance care planning in patients with end stage renal disease: qualitative interview study. *BMJ* 2006;333(7574):886. doi: 10.1136/bmj.38965.626250.55 [published Online First: 2006/09/23]
27. Fischer GS, Tulskey JA, Rose MR, et al. Patient knowledge and physician predictions of treatment preferences after discussion of advance directives. *J Gen Intern Med* 1998;13(7):447-54. [published Online First: 1998/08/01]
28. Quill TE. Perspectives on care at the close of life. Initiating end-of-life discussions with seriously ill patients: addressing the "elephant in the room". *JAMA* 2000;284(19):2502-7. [published Online First: 2000/11/14]
29. Sharman SJ, Garry M, Jacobsen JA, et al. False memories for end-of-life decisions. *Health Psychol* 2008;27(2):291-6. doi: 10.1037/0278-6133.27.2.291 [published Online First: 2008/04/02]
30. Friedrichsen MJ, Strang PM, Carlsson ME. Breaking bad news in the transition from curative to palliative cancer care--patient's view of the doctor giving the information. *Support Care Cancer* 2000;8(6):472-8. [published Online First: 2000/11/30]

- 1  
2  
3 31. Detmar SB, Aaronson NK, Wever LD, et al. How are you feeling? Who wants to know?  
4 Patients' and oncologists' preferences for discussing health-related quality-of-life issues. *J*  
5 *Clin Oncol* 2000;18(18):3295-301. doi: 10.1200/JCO.2000.18.18.3295 [published Online  
6 First: 2000/09/14]
- 7  
8 32. Wenrich MD, Curtis JR, Shannon SE, et al. Communicating with dying patients within the  
9 spectrum of medical care from terminal diagnosis to death. *Arch Intern Med*  
10 2001;161(6):868-74. [published Online First: 2001/03/27]
- 11  
12 33. Butow PN, Kazemi JN, Beeney LJ, et al. When the diagnosis is cancer: patient  
13 communication experiences and preferences. *Cancer* 1996;77(12):2630-7. doi:  
14 10.1002/(SICI)1097-0142(19960615)77:12<2630::AID-CNCR29>3.0.CO;2-S [published  
15 Online First: 1996/06/15]
- 16  
17 34. Clark RE, LaBeff EE. Death telling: managing the delivery of bad news. *J Health Soc Behav*  
18 1982;23(4):366-80. [published Online First: 1982/12/01]
- 19  
20 35. Eden OB, Black I, MacKinlay GA, et al. Communication with parents of children with  
21 cancer. *Palliat Med* 1994;8(2):105-14. doi: 10.1177/026921639400800203 [published  
22 Online First: 1994/01/01]
- 23  
24 36. Ford S, Fallowfield L, Lewis S. Can oncologists detect distress in their out-patients and how  
25 satisfied are they with their performance during bad news consultations? *Br J Cancer*  
26 1994;70(4):767-70. [published Online First: 1994/10/01]
- 27  
28 37. Ford S, Fallowfield L, Lewis S. Doctor-patient interactions in oncology. *Soc Sci Med*  
29 1996;42(11):1511-9. [published Online First: 1996/06/01]
- 30  
31 38. Ptacek JT, Eberhardt TL. Breaking bad news. A review of the literature. *JAMA*  
32 1996;276(6):496-502. [published Online First: 1996/08/14]
- 33  
34 39. Bakitas M, Lyons KD, Hegel MT, et al. Effects of a palliative care intervention on clinical  
35 outcomes in patients with advanced cancer: the Project ENABLE II randomized  
36 controlled trial. *JAMA* 2009;302(7):741-9. doi: 10.1001/jama.2009.1198 [published  
37 Online First: 2009/08/20]
- 38  
39 40. Bakitas MA, Tosteson TD, Li Z, et al. Early Versus Delayed Initiation of Concurrent  
40 Palliative Oncology Care: Patient Outcomes in the ENABLE III Randomized Controlled  
41 Trial. *J Clin Oncol* 2015;33(13):1438-45. doi: 10.1200/JCO.2014.58.6362 [published  
42 Online First: 2015/03/25]
- 43  
44 41. Hanson LC, Zimmerman S, Song MK, et al. Effect of the Goals of Care Intervention for  
45 Advanced Dementia: A Randomized Clinical Trial. *JAMA Intern Med* 2017;177(1):24-  
46 31. doi: 10.1001/jamainternmed.2016.7031 [published Online First: 2016/11/29]
- 47  
48 42. Temel JS, Greer JA, Muzikansky A, et al. Early palliative care for patients with metastatic  
49 non-small-cell lung cancer. *N Engl J Med* 2010;363(8):733-42. doi:  
50 10.1056/NEJMoa1000678 [published Online First: 2010/09/08]
- 51  
52 43. Thorpe KE, Zwarenstein M, Oxman AD, et al. A pragmatic-explanatory continuum indicator  
53 summary (PRECIS): a tool to help trial designers. *Journal of clinical epidemiology*  
54 2009;62(5):464-75. doi: 10.1016/j.jclinepi.2008.12.011 [published Online First:  
55 2009/04/08]
- 56  
57 44. Ford I, Norrie J. Pragmatic Trials. *N Engl J Med* 2016;375(5):454-63. doi:  
58 10.1056/NEJMra1510059 [published Online First: 2016/08/16]
- 59  
60 45. Chan A-W, Tetzlaff JM, Altman DG, et al. SPIRIT 2013 Statement: Defining standard  
protocol items for clinical trials. *Ann Intern Med*. 2013;158(3):200-207

- 1
- 2
- 3
- 4 46. Back AL, Arnold RM, Baile WF, et al. Efficacy of communication skills training for giving
- 5 bad news and discussing transitions to palliative care. *Archives of internal medicine*
- 6 2007;167(5):453-60. doi: 10.1001/archinte.167.5.453 [published Online First:
- 7 2007/03/14]
- 8 47. Back AL, Arnold RM, Baile WF, et al. Faculty development to change the paradigm of
- 9 communication skills teaching in oncology. *Journal of clinical oncology : official journal*
- 10 *of the American Society of Clinical Oncology* 2009;27(7):1137-41. doi:
- 11 10.1200/jco.2008.20.2408 [published Online First: 2009/01/28]
- 12 48. Back AL, Arnold RM, Tulskey JA, et al. Teaching communication skills to medical oncology
- 13 fellows. *Journal of clinical oncology : official journal of the American Society of Clinical*
- 14 *Oncology* 2003;21(12):2433-6. doi: 10.1200/jco.2003.09.073 [published Online First:
- 15 2003/06/14]
- 16 49. Clayton JM, Adler JL, O'Callaghan A, et al. Intensive communication skills teaching for
- 17 specialist training in palliative medicine: development and evaluation of an experiential
- 18 workshop. *Journal of palliative medicine* 2012;15(5):585-91. doi:
- 19 10.1089/jpm.2011.0292 [published Online First: 2012/03/22]
- 20 50. Clayton JM, Butow PN, Waters A, et al. Evaluation of a novel individualised
- 21 communication-skills training intervention to improve doctors' confidence and skills in
- 22 end-of-life communication. *Palliat Med* 2013;27(3):236-43. doi:
- 23 10.1177/0269216312449683 [published Online First: 2012/06/20]
- 24 51. Fryer-Edwards K, Arnold RM, Baile W, et al. Reflective teaching practices: an approach to
- 25 teaching communication skills in a small-group setting. *Acad Med* 2006;81(7):638-44.
- 26 doi: 10.1097/01.ACM.0000232414.43142.45 [published Online First: 2006/06/27]
- 27 52. Tulskey JA, Arnold RM, Alexander SC, et al. Enhancing communication between oncologists
- 28 and patients with a computer-based training program: a randomized trial. *Annals of*
- 29 *internal medicine* 2011;155(9):593-601. doi: 10.7326/0003-4819-155-9-201111010-
- 30 00007 [published Online First: 2011/11/02]
- 31 53. Cohen SM, Volandes AE, Shaffer ML, et al. Concordance Between Proxy Level of Care
- 32 Preference and Advance Directives Among Nursing Home Residents With Advanced
- 33 Dementia: A Cluster Randomized Clinical Trial. *J Pain Symptom Manage*
- 34 2019;57(1):37-46 e1. doi: 10.1016/j.jpainsymman.2018.09.018 [published Online First:
- 35 2018/10/03]
- 36 54. Deep KS, Hunter A, Murphy K, et al. "It helps me see with my heart": how video informs
- 37 patients' rationale for decisions about future care in advanced dementia. *Patient Educ*
- 38 *Couns* 2010;81(2):229-34. doi: 10.1016/j.pec.2010.02.004 [published Online First:
- 39 2010/03/03]
- 40 55. El-Jawahri A, Paasche-Orlow MK, Matlock D, et al. Randomized, Controlled Trial of an
- 41 Advance Care Planning Video Decision Support Tool for Patients With Advanced Heart
- 42 Failure. *Circulation* 2016;134(1):52-60. doi: 10.1161/CIRCULATIONAHA.116.021937
- 43 [published Online First: 2016/07/01]
- 44 56. El-Jawahri A, Podgurski LM, Eichler AF, et al. Use of video to facilitate end-of-life
- 45 discussions with patients with cancer: a randomized controlled trial. *J Clin Oncol*
- 46 2010;28(2):305-10. doi: 10.1200/JCO.2009.24.7502 [published Online First: 2009/12/02]
- 47 57. Epstein AS, Volandes AE, Chen LY, et al. A randomized controlled trial of a
- 48 cardiopulmonary resuscitation video in advance care planning for progressive pancreas
- 49
- 50
- 51
- 52
- 53
- 54
- 55
- 56
- 57
- 58
- 59
- 60

- 1  
2  
3 and hepatobiliary cancer patients. *Journal of palliative medicine* 2013;16(6):623-31. doi:  
4 10.1089/jpm.2012.0524 [published Online First: 2013/06/04]  
5  
6 58. McCannon JB, O'Donnell WJ, Thompson BT, et al. Augmenting communication and  
7 decision making in the intensive care unit with a cardiopulmonary resuscitation video  
8 decision support tool: a temporal intervention study. *Journal of palliative medicine*  
9 2012;15(12):1382-7. doi: 10.1089/jpm.2012.0215 [published Online First: 2012/10/27]  
10  
11 59. Quintiliani LM, Murphy JE, Buitron de la Vega P, et al. Feasibility and Patient Perceptions  
12 of Video Declarations Regarding End-of-Life Decisions by Hospitalized Patients.  
13 *Journal of palliative medicine* 2018;21(6):766-72. doi: 10.1089/jpm.2017.0351  
14 [published Online First: 2018/04/13]  
15  
16 60. Volandes AE, Ariza M, Abbo ED, et al. Overcoming educational barriers for advance care  
17 planning in Latinos with video images. *Journal of palliative medicine* 2008;11(5):700-6.  
18 doi: 10.1089/jpm.2007.0172 [published Online First: 2008/07/01]  
19  
20 61. Volandes AE, Barry MJ, Chang Y, et al. Improving decision making at the end of life with  
21 video images. *Med Decis Making* 2010;30(1):29-34. doi: 10.1177/0272989X09341587  
22 [published Online First: 2009/08/14]  
23  
24 62. Volandes AE, Brandeis GH, Davis AD, et al. A randomized controlled trial of a goals-of-care  
25 video for elderly patients admitted to skilled nursing facilities. *Journal of palliative*  
26 *medicine* 2012;15(7):805-11. doi: 10.1089/jpm.2011.0505 [published Online First:  
27 2012/05/09]  
28  
29 63. Volandes AE, Ferguson LA, Davis AD, et al. Assessing end-of-life preferences for advanced  
30 dementia in rural patients using an educational video: a randomized controlled trial.  
31 *Journal of palliative medicine* 2011;14(2):169-77. doi: 10.1089/jpm.2010.0299  
32 [published Online First: 2011/01/25]  
33  
34 64. Volandes AE, Lehmann LS, Cook EF, et al. Using video images of dementia in advance care  
35 planning. *Arch Intern Med* 2007;167(8):828-33. doi: 10.1001/archinte.167.8.828  
36 [published Online First: 2007/04/25]  
37  
38 65. Volandes AE, Levin TT, Slovin S, et al. Augmenting advance care planning in poor  
39 prognosis cancer with a video decision aid: a preintervention-postintervention study.  
40 *Cancer* 2012;118(17):4331-8. doi: 10.1002/cncr.27423 [published Online First:  
41 2012/01/19]  
42  
43 66. Volandes AE, Mitchell SL, Gillick MR, et al. Using video images to improve the accuracy of  
44 surrogate decision-making: a randomized controlled trial. *J Am Med Dir Assoc*  
45 2009;10(8):575-80. doi: 10.1016/j.jamda.2009.05.006 [published Online First:  
46 2009/10/08]  
47  
48 67. Volandes AE, Paasche-Orlow M, Gillick MR, et al. Health literacy not race predicts end-of-  
49 life care preferences. *Journal of palliative medicine* 2008;11(5):754-62. doi:  
50 10.1089/jpm.2007.0224 [published Online First: 2008/07/01]  
51  
52 68. Volandes AE, Paasche-Orlow MK, Barry MJ, et al. Video decision support tool for advance  
53 care planning in dementia: randomised controlled trial. *BMJ* 2009;338:b2159. doi:  
54 10.1136/bmj.b2159 [published Online First: 2009/05/30]  
55  
56 69. Volandes AE, Paasche-Orlow MK, Davis AD, et al. Use of Video Decision Aids to Promote  
57 Advance Care Planning in Hilo, Hawai'i. *J Gen Intern Med* 2016;31(9):1035-40. doi:  
58 10.1007/s11606-016-3730-2 [published Online First: 2016/05/20]  
59  
60 70. Volandes AE, Paasche-Orlow MK, Mitchell SL, et al. Randomized controlled trial of a video  
decision support tool for cardiopulmonary resuscitation decision making in advanced

- 1  
2  
3 cancer. *J Clin Oncol* 2013;31(3):380-6. doi: 10.1200/JCO.2012.43.9570 [published  
4 Online First: 2012/12/13]
- 5 71. El Jawahri A, Temel JS, Ramachandran KJ, et al. A randomized controlled trial of a CPR  
6 video decision support tool for seriously ill hospitalized patients with advanced cancer.  
7 ASCO Annual Meeting, 2015.
- 8 72. El-Jawahri A, Mitchell SL, Paasche-Orlow MK, et al. A Randomized Controlled Trial of a  
9 CPR and Intubation Video Decision Support Tool for Hospitalized Patients. *J Gen Intern  
10 Med* 2015;30(8):1071-80. doi: 10.1007/s11606-015-3200-2 [published Online First:  
11 2015/02/19]
- 12 73. Washington State Health Care Authority. Patient Decision Aids.  
13 <https://www.hca.wa.gov/about-hca/healthier-washington/patient-decision-aids-pdas>.  
14 Accessed May 11, 2020.
- 15 74. Dyer N, Sorra JS, Smith SA, et al. Psychometric properties of the Consumer Assessment of  
16 Healthcare Providers and Systems (CAHPS(R)) Clinician and Group Adult Visit Survey.  
17 *Medical care* 2012;50 Suppl:S28-34. doi: 10.1097/MLR.0b013e31826cbc0d [published  
18 Online First: 2012/10/25]
- 19 75. Mukherjee S, Rodriguez HP, Elliott MN, et al. Modern psychometric methods for estimating  
20 physician performance on the Clinician and Group CAHPS survey. *Health Serv  
21 Outcomes Res Method* 2013;13:109-23. doi: 10.1007/s10742-013-0111-8
- 22 76. Holmes-Rovner M, Kroll J, Schmitt N, et al. Patient Satisfaction with Health Care  
23 Decisions: The Satisfaction with Decision Scale. 1996;16(1):58-64. doi:  
24 10.1177/0272989x9601600114
- 25 77. Brehaut JC, O'Connor AM, Wood TJ, et al. Validation of a decision regret scale. *Med Decis  
26 Making* 2003;23(4):281-92. doi: 10.1177/0272989x03256005 [published Online First:  
27 2003/08/21]
- 28 78. Goel V, Sawka CA, Thiel EC, et al. Randomized trial of a patient decision aid for choice of  
29 surgical treatment for breast cancer. *Med Decis Making* 2001;21(1):1-6. doi:  
30 10.1177/0272989x0102100101 [published Online First: 2001/02/24]
- 31 79. Hassett MJ, Ritzwoller DP, Taback N, et al. Validating billing/encounter codes as indicators  
32 of lung, colorectal, breast, and prostate cancer recurrence using 2 large contemporary  
33 cohorts. *Medical care* 2014;52(10):e65-73. doi: 10.1097/MLR.0b013e318277eb6f  
34 [published Online First: 2012/12/12]
- 35 80. Lindvall C, Lilley EJ, Zupanc SN, et al. Natural Language Processing to Assess End-of-Life  
36 Quality Indicators in Cancer Patients Receiving Palliative Surgery. *Journal of palliative  
37 medicine* 2019;22(2):183-87. doi: 10.1089/jpm.2018.0326 [published Online First:  
38 2018/10/18]
- 39 81. Poort H, Zupanc SN, Leiter RE, et al. Documentation of Palliative and End-of-Life Care  
40 Process Measures Among Young Adults Who Died of Cancer: A Natural Language  
41 Processing Approach. *J Adolesc Young Adult Oncol* 2019 doi: 10.1089/jayao.2019.0040  
42 [published Online First: 2019/08/15]
- 43 82. Udelsman BV, Lilley EJ, Qadan M, et al. Deficits in the Palliative Care Process Measures in  
44 Patients with Advanced Pancreatic Cancer Undergoing Operative and Invasive  
45 Nonoperative Palliative Procedures. *Ann Surg Oncol* 2019 doi: 10.1245/s10434-019-  
46 07757-2 [published Online First: 2019/08/30]
- 47  
48  
49  
50  
51  
52  
53  
54  
55  
56  
57  
58  
59  
60



- 1  
2  
3 83. Wright A. REDCap: A Tool for the Electronic Capture of Research Data. *Journal of*  
4 *Electronic Resources in Medical Libraries* 2016;13(4):197-201. doi:  
5 10.1080/15424065.2016.1259026  
6  
7 84. Pugno PA. Advance directives in the primary care setting. *Wiener klinische Wochenschrift*  
8 2004;116(13):417-9. [published Online First: 2004/09/04]  
9  
10 85. Hughes JP, Granston TS, Heagerty PJ. Current issues in the design and analysis of stepped  
11 wedge trials. *Contemp Clin Trials* 2015;45(Pt A):55-60. doi: 10.1016/j.cct.2015.07.006  
12 [published Online First: 2015/08/08]  
13  
14 86. Hooper R, Bourke L. Cluster randomised trials with repeated cross sections: alternatives to  
15 parallel group designs. *BMJ* 2015;350:h2925. doi: 10.1136/bmj.h2925 [published Online  
16 First: 2015/06/10]  
17  
18 87. Hooper R, Teerenstra S, de Hoop E, et al. Sample size calculation for stepped wedge and  
19 other longitudinal cluster randomised trials. *Stat Med* 2016;35(26):4718-28. doi:  
20 10.1002/sim.7028 [published Online First: 2016/06/29]  
21  
22 88. Hui D, Bruera E. Integrating palliative care into the trajectory of cancer care. *Nat Rev Clin*  
23 *Oncol* 2016;13(3):159-71. doi: 10.1038/nrclinonc.2015.201 [published Online First:  
24 2015/11/26]  
25  
26 89. Lincoln YS, Guba EG. *Naturalistic Inquiry*: Sage Publications 1985:117.  
27  
28  
29  
30  
31  
32  
33  
34  
35  
36  
37  
38  
39  
40  
41  
42  
43  
44  
45  
46  
47  
48  
49  
50  
51  
52  
53  
54  
55  
56  
57  
58  
59  
60

## APPENDIX

### VIDEO DECLARATION PROCEDURES

For the video declarations, the RA introduces the concept to patients with a standardized introduction that is piloted during the UG3 phase and modified as needed. The RA uses the camera on a tablet computer, ensuring that the tablet is situated in such a way that the patient cannot see themselves on screen while they are talking, and records the subject. The RA will then guide the subject to create a video declaration through a series of prompting questions. The subject answers each prompt, and at the end, the RA will merge all responses to create a continuous video, removing the RA's voice. The prompts include: 1) What's most important to you? 2) What concerns do you have about getting sick? 3) If you were very sick, are there any specific medical treatments that you do or do not want? Please think about things like having CPR if your heart stopped beating or having a breathing tube if you stopped breathing. 4) What spiritual beliefs do you have that might influence your medical decisions? In the UG3 phase, half of patients will be asked to answer question 3 without the second half of the prompt – specifically naming medical treatments with the aim of helping to inform our decisions about the usefulness of providing information on treatment decisions for the video declarations in the UH3 phase. After the recording is completed, the RA plays the video for the subject to ensure they feel it accurately represents their preferences. Patients may re-film their video declaration as many times as they want to ensure their preferences are accurately described. Once the patient approves the video, the RA discusses the process by which patients will share it with clinicians, family, or whomever else they wish to include. Patients have the option of receiving the video on a USB drive, through DropBox, or as an unlisted video on YouTube.

1  
2  
3 We will qualitatively analyze video declarations by first transcribing recordings verbatim  
4 and adding in any relevant non-verbal information, such as expressions of hesitation or sadness.  
5  
6 We then draft a preliminary coding framework using an existing framework of cancer-specific  
7 palliative care.<sup>88</sup> We plan to include the following among our primary coding categories: 1)  
8 advance care planning; 2) acute issues; 3) psychosocial issues; 4) after death wishes; and 5)  
9 existential and spiritual issues. We begin by coding 15 videos (5 from each site) using this  
10 preliminary framework and then add further codes to include other emerging themes. Members  
11 from the entire research team review the revised coding structure and approve the final coding  
12 framework for coding the remaining transcripts, which is done independently by RAs at each  
13 site. Coders attend monthly phone meetings to review coding progress and resolve discrepancies  
14 until coding is complete. To enhance the trustworthiness of the analysis,<sup>89</sup> we will hold at least  
15 two peer debriefing meetings with the entire research team to show them the transcripts and the  
16 codes applied and ask for their feedback. Results from these meetings will be incorporated into  
17 the ongoing coding process. Finalized codes will be summarized into themes to be presented  
18 descriptively and accompanied by illustrative quotations highlighting the content. We are using  
19 NVIVO version 11 qualitative software to assist in data management. We anticipate that we will  
20 use the coding structure developed during the UG3 phase, but we will continue our plan of  
21 group-based coding with peer debriefing during the UH3 phase as well. Further analysis of the  
22 video declarations will examine the clarity and comprehensiveness with which the patients  
23 communicate their preferences (i.e., would a clinician watching the video understand how to  
24 enact this patient's advance directive) and will compare what is presented in the video  
25 declaration with preferences as codified in the patient's medical record documentation.  
26  
27  
28  
29  
30  
31  
32  
33  
34  
35  
36  
37  
38  
39  
40  
41  
42  
43  
44  
45  
46  
47  
48  
49  
50  
51  
52  
53  
54  
55  
56  
57  
58  
59  
60

## SURVEY INSTRUMENTS

Clinician Survey**1. Age:****2. Gender:** Male Female Transgender I prefer not to answer**3. What is your ethnic/race background:** American Indian or Alaska Native White Asian More than one race \_\_\_\_\_ Black or African American Other (specify) \_\_\_\_\_ Native Hawaiian or other Pacific Islander Unknown or not reported**4. Do you consider yourself to be Hispanic or Latino?** Yes No**5. What is your religion?** Christian Buddhist/Hindu/Eastern Jewish No Affiliation Islamic/Muslim Other (specify) \_\_\_\_\_**6. On a scale of 0-100, (0 being not strong at all, 100 being very strong), how strong an influence do you consider your religious/spiritual beliefs and practices to be in your life?**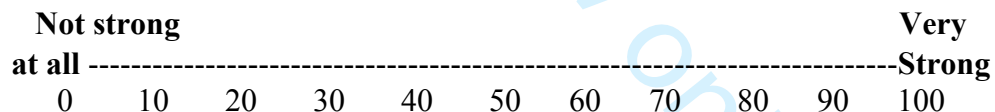**7. How many years have you been in practice since completing your training?** 0-5 6-10 11-15 16-20 20+**8. How many hours do you spend per week in direct patient care?**

- 1  
2  
3  0-10  
4  11-20  
5  21-30  
6  31-40  
7  > 40  
8  
9

10  
11 **9. Prior to this study, and during any of the following stages of your career, have you**  
12 **participated in clinician-patient communication skills training? Please respond**  
13 **below for...** (We refer here to any kind of workshop, seminar, or interactive on-line  
14 training that specifically instructed you on effective ways or talking to your patients. We  
15 do not include attending single lectures without interactive or practice elements.)  
16

- 17 **A) Professional school (PA, nursing, medical school, etc.)?** Y/N  
18 **B) Residency (if applicable)?** Y/N  
19 **C) Fellowship (if applicable)?** Y/N  
20 **D) Post-training clinical practice?** Y/N  
21  
22

23 **10. Have you ever attended a VitalTalk course?** Y/N  
24

25 **Health care providers commonly try to balance all aspects of patient care, including the**  
26 **social and emotional aspects of patient care and the technological and scientific aspects.**  
27 **Virtually no one is exactly equal on these two aspects.**  
28

29  
30 **11. Do you think you are more inclined toward social and emotional aspects of patient**  
31 **care or more inclined toward the technological and scientific aspects?**

- 32  Social & emotional  
33  Technological & scientific  
34

35 **12. Are you a little more inclined to the aspects you chose in the last question or a lot**  
36 **more inclined?**

- 37  A little more inclined  
38  A lot more inclined  
39  
40

41  
42 **Thank you again for your time. The survey is complete.**

43 **Patient Survey**

44  
45 Verbally Administered by Research Assistant

46  
47  
48 **1. How confident are you that you will get the type of medical care you want if you**  
49 **become seriously ill and could no longer communicate your preferences?**

- 50  Not at all confident  
51  Slightly confident  
52  Somewhat confident  
53  Fairly confident  
54  Very confident  
55  
56

When answering the following questions, please think about the primary provider who has been treating your cancer.

2. Who do you consider to be your primary cancer provider?
  - 1  Oncologist
  - 2  Oncology Nurse Practitioner
  - 3  Oncology Physician Assistant
  - 4  Other (What is the role of that provider: \_\_\_\_\_)
  
3. In general, how often does this provider explain things in a way that is easy to understand?
  - 1  Never
  - 2  Sometimes
  - 3  Usually
  - 4  Always
  
4. In general, how often does this provider listen carefully to you?
  - 1  Never
  - 2  Sometimes
  - 3  Usually
  - 4  Always
  
5. In general, how often does this provider seem to know the important information about your medical history?
  - 1  Never
  - 2  Sometimes
  - 3  Usually
  - 4  Always
  
6. In general, how often does this provider show respect for what you have to say?
  - 1  Never
  - 2  Sometimes
  - 3  Usually
  - 4  Always
  
7. In general, how often does this provider spend enough time with you?
  - 1  Never
  - 2  Sometimes
  - 3  Usually
  - 4  Always

1  
2  
3  
4  
5 8. Using any number from 0 to 10, where 0 is the worst provider possible and 10 is the  
6 best provider possible, what number would you use to rate this provider?

7  0 Worst provider possible

8  1

9  2

10  3

11  4

12  5

13  6

14  7

15  8

16  9

17  10 Best provider possible

18  
19  
20  
21  
22  
23 9. Has your oncology team discussed with you what to expect with your illness in the  
24 future?

25 <sup>1</sup> Yes, definitely

26 <sup>2</sup> Yes, somewhat

27 <sup>3</sup> No

28  
29  
30  
31 10. Has your oncology team ever asked what's most important to you?

32 <sup>1</sup> Yes, definitely

33 <sup>2</sup> Yes, somewhat

34 <sup>3</sup> No

35  
36  
37 11. Has your oncology team talked about how the treatment plan should match what is  
38 most important to you?

39 <sup>1</sup> Yes, definitely

40 <sup>2</sup> Yes, somewhat

41 <sup>3</sup> No

42  
43  
44  
45 When answering the following questions, please think about the last decision about your  
46 cancer treatment you made together with a health care provider.

47  
48  
49 12. I am satisfied that I was adequately informed about the issues important to my  
50 decision.

51 <sup>1</sup> Strongly disagree

52 <sup>2</sup> Disagree

53 <sup>3</sup> Neither agree nor disagree

54 <sup>4</sup> Agree

1  
2  
3  Strongly agree  
4  
5

6 13. The decision I made was the best decision possible for me personally.

- 7  Strongly disagree  
8  Disagree  
9  Neither agree nor disagree  
10  Agree  
11  Strongly agree  
12  
13

14 14. I am satisfied that my decision was consistent with my personal values.

- 15  Strongly disagree  
16  Disagree  
17  Neither agree nor disagree  
18  Agree  
19  Strongly agree  
20  
21  
22

23  
24 15. I expect to successfully carry out (or continue to carry out) the decision I made.

- 25  Strongly disagree  
26  Disagree  
27  Neither agree nor disagree  
28  Agree  
29  Strongly agree  
30  
31  
32

33  
34 16. I am satisfied that this was my decision to make.

- 35  Strongly disagree  
36  Disagree  
37  Neither agree nor disagree  
38  Agree  
39  Strongly agree  
40  
41  
42

43 17. I am satisfied with my decision.

- 44  Strongly disagree  
45  Disagree  
46  Neither agree nor disagree  
47  Agree  
48  Strongly agree  
49  
50  
51

52 When answering the following questions, please think about the last decision about your cancer  
53 treatment you made together with a health care provider.  
54

55  
56 18. It was the right decision.  
57  
58  
59  
60



1  
2  
3  
4  
5  
6  
7  
8  
9  
10  
11  
12  
13  
14  
15  
16  
17  
18  
19  
20  
21  
22  
23  
24  
25  
26  
27  
28  
29  
30  
31  
32  
33  
34  
35  
36  
37  
38  
39  
40  
41  
42  
43  
44  
45  
46  
47  
48  
49  
50  
51  
52  
53  
54  
55  
56  
57  
58  
59  
60

- Strongly disagree
- Disagree
- Neither agree nor disagree
- Agree
- Strongly agree

19. I regret the choice that was made.

- Strongly disagree
- Disagree
- Neither agree nor disagree
- Agree
- Strongly agree

20. I would go for the same choice if I had to do it over again.

- Strongly disagree
- Disagree
- Neither agree nor disagree
- Agree
- Strongly agree

21. The choice did me a lot of harm.

- Strongly disagree
- Disagree
- Neither agree nor disagree
- Agree
- Strongly agree

22. The decision was a wise one.

- Strongly disagree
- Disagree
- Neither agree nor disagree
- Agree
- Strongly agree

23. Have you talked with a family member or close friend about the types of medical care you want or don't want if you become seriously ill in the future and could no longer communicate your preferences?

1  
2  
3  No

4  Yes

5  
6  
7 20a. Of those listed below, who was that person/those people? (Select all that apply)

8  Spouse/partner

9  Daughter

10  Son

11  Daughter-in-law

12  Son-in-law

13  Stepdaughter

14  Stepson

15  Sister

16  Brother

17  Sister-in-law

18  Brother-in-law

19  Mother

20  Stepmother

21  Mother-in-law

22  Father

23  Father-in-law

24  Granddaughter

25  Grandson

26  Niece

27  Nephew

28  Aunt

29  Cousin

30  Stepdaughter's son/daughter

31  Stepson's son/daughter

32  Daughter-in-law's son/daughter

33  Son-in-law's son/daughter

34  Boarder/renter

35  Paid aide/Housekeeper/Employee

36  Roommate

37  Ex-wife/Ex-husband

38  Boyfriend/girlfriend

39  Neighbor

40  Friend

41  Service/Someone from the place you live

42  Co-worker

43  Minister, Priest, or other Clergy

44  Psychiatrist, Psychologist, Counselor, or Therapist

1  
2  
3  
4  
5  
6  
7  
8  
9  
10  
11  
12  
13  
14  
15  
16  
17  
18  
19  
20  
21  
22  
23  
24  
25  
26  
27  
28  
29  
30  
31  
32  
33  
34  
35  
36  
37  
38  
39  
40  
41  
42  
43  
44  
45  
46  
47  
48  
49  
50  
51  
52  
53  
54  
55  
56  
57  
58  
59  
60

<sup>38</sup>  Other Relative  
<sup>39</sup>  Other Non-Relative

For peer review only

## Research Consent Form for Non-Clinical Research

Dana-Farber/ Harvard Cancer Center  
BIDMC/BCH/BWH/DFCI/MGH/Partners Network Affiliates

OHRs 10.02.2017

**Protocol Title:** Advance Care Planning: Promoting Effective and Aligned Communication in the Elderly

**DF/HCC Principal Research Investigator / Institution:** James Tulsky, MD/DFCI

**DF/HCC Site-Responsible Research Investigator(s) / Institution(s):**

James Tulsky, MD/DFCI

Angelo Volandes, MD/MGH

### A. INTRODUCTION

We are inviting you to take part in a research study. Research is a way of gaining new knowledge. A person who participates in a research study is called a “participant.” In this research study, we are working to help oncologists better serve patients by delivering more patient-centered medical care that is consistent with what patients want and their underlying goals and values.

The goal of this study is to test an intervention that seeks to increase the likelihood that older patients’ values and goals are incorporated into cancer care decision-making.

It is expected that about 12,000 people will take part in this research study. An institution that is supporting a research study either by giving money or supplying something that is important for the research is called the “sponsor.” The sponsor of this protocol is the National Institutes of Health (NIH) and the study will run for 5 years. This research consent form explains why this research study is being done, what is involved in participating in the research study, the possible risks and benefits of participation, alternatives to participation, and your rights as a research participant. The decision to participate is yours. If you decide to participate, please sign and date at the end of the form. We will give you a copy so that you can refer to it while you are involved in this research study.

You have been chosen to participate in this study, based on your doctor’s recommendation and because you are an older adult with advanced cancer.

## Research Consent Form for Non-Clinical Research

Dana-Farber/ Harvard Cancer Center

BIDMC/BCH/BWH/DFCI/MGH/Partners Network Affiliates

OHRs 10.02.2017

Your doctor felt that you might be willing to talk about your goals and wishes related to your medical care so your doctors and family can understand what is most important for you. You have been chosen to participate in this study, based on your doctor's recommendation. (Some de-identified information was provided to us through your medical records).

We encourage you to take some time to think this over and to discuss it with other people and to ask questions now and at any time in the future.

Dr. Angelo Volandes, a Massachusetts General Hospital (MGH) Investigator on this study, and his spouse are co-founders of and receive income from ACP Decisions Nous, a nonprofit organization developing the advanced care planning video decision support tools being evaluated in this study. Dr. Volandes' financial interests have been reviewed and are managed by Massachusetts General Hospital and Partners HealthCare in accordance with their conflict of interest policies. MGH will only be receiving de-identified data.

### **B. WHY IS THIS RESEARCH STUDY BEING DONE?**

The purpose of this study is to improve the quality of care provided to older Americans with cancer. We are working to help oncologists better serve patients by delivering more patient-centered medical care that is consistent with what patients want.

### **C. WHAT OTHER OPTIONS ARE THERE?**

Taking part in this research study is voluntary. You may choose not to be in the study, or, if you agree to be in the study, you may withdraw from the study at any time. If you withdraw from the study, no new data about you will be collected for study purposes.

If you participate, we will also ask if you wish to create a video of yourself describing what is important to you, any worries you have, and your preferences for medical care. We call these "video declarations."

- A Research Assistant will also ask you to complete a written video declaration.

## Research Consent Form for Non-Clinical Research

Dana-Farber/ Harvard Cancer Center

BIDMC/BCH/BWH/DFCI/MGH/Partners Network Affiliates

OHSR 10.02.2017

- If you agree, we will record that declaration.
- We will ask you to talk about your Advance Care Planning preferences, for medical care so your doctors and family can understand what is most important for you.
- We will show your video to you when you are done.
- If you aren't happy with the video, you can record it again.
- When the recording is complete, the RA will play the video for you to see if you feel it accurately represents your preferences.
- There might be occasions when we would like to publicly share the information that we have learned through this research for demonstration purposes and at similar venues. We will provide you with an option to let us know if you are willing to publicly share your video via in-person or online webinar/lecture.

### **This visit will involve the following:**

- **Recording a personal video declaration that includes both video and audio recording**

### **D. HOW LONG WILL I BE IN THIS RESEARCH STUDY?**

You will be in this research study for the length of time that your scheduled appointment will take. After you complete the interview and video recording, investigators will continue to have access to your medical record and video for the purpose of analyzing the study outcomes.

You may be taken off the research study for reasons such as:

- It is considered to be in your best interest
- There is any problem with following study procedures
- There are any problems with research funding
- Or for any other reason

If you are removed from the research study, the research Investigator will explain to you why you were removed.

In addition, you can stop participating in the research study at any time.

## Research Consent Form for Non-Clinical Research

Dana-Farber/ Harvard Cancer Center

BIDMC/BCH/BWH/DFCI/MGH/Partners Network Affiliates

OHRS 10.02.2017

### **E. WHAT ARE THE RISKS OR DISCOMFORTS OF THE RESEARCH STUDY?**

There are risks to taking part in any research study, but the risks in this study are small and non-medical. The main risk is loss of confidentiality. You might become a little uncomfortable, sad, or even distressed as you contemplate serious illness with your provider, and there will be clinicians trained to help you with any discomfort you might feel.

During the research study, you will be provided with any new information that may affect your health or willingness to participate. You may be asked to sign a new consent form that shows that you have been informed of new information relating to this research study.

### **F. WHAT ARE THE BENEFITS OF THE RESEARCH STUDY?**

Taking part in this research study may or may not benefit you. We hope the information learned from this research study will help you and your doctors in the clinics to benefit from the study by having your treatments better aligned with your preferences. There is the potential for the results learned from the study to help us to improve the Advance Care Planning of the overall outpatient clinic population, and particularly those with advanced cancer. There is the potential to validate an intervention that could ensure that treatments are better aligned with patients' preferences.

### **G. CAN I STOP BEING IN THE RESEARCH STUDY AND WHAT ARE MY RIGHTS?**

You have the right to choose not to sign this form. If you decide not to sign this form, you cannot participate in this research study.

You can stop being in the research study at any time. Tell the research doctor if you are thinking about stopping or decide to stop. Leaving the research study will not affect your medical care. You can still get your medical care from your hospital or Investigator.

If you choose to not participate, or if you are not eligible to participate, or if you withdraw from this research study, this will not affect your present or future care and will not cause any penalty or loss of benefits to which you are otherwise entitled.

## Research Consent Form for Non-Clinical Research

Dana-Farber/ Harvard Cancer Center  
BIDMC/BCH/BWH/DFCI/MGH/Partners Network Affiliates

OHRs 10.02.2017

### H. WHAT ARE THE COSTS?

There is no cost to you for participating in this study.

### I. WHAT ABOUT CONFIDENTIALITY?

We will take measures to protect the privacy and security of all your personal information, but we cannot guarantee complete confidentiality of study data. All staff with access to information will be trained in privacy protection rules. Any personal information will be kept on a single central protected server with 24/7 security monitoring.

Applications will be designed with data security as the first goal and will be carefully reviewed for security prior to usage in the study. Participating oncologists will also be instructed on strict procedures to ensure the privacy and security of the video recordings at all levels of the data collection and storage process. The only people who will see this information will be study staff, investigators, other investigators who have been authorized by the research team to conduct analyses, and also those who have a contractual relationship with us in service of the research.

The results of this research study may be published. You will not be identified in publications without your permission.

This trial may be registered on <https://www.clinicaltrials.gov>, a publicly available registry of clinical trials. This website will not include information that can identify you. At most, the website will include a summary of the results. You can search this website at any time.

### J. WHOM DO I CONTACT IF I HAVE QUESTIONS ABOUT THE RESEARCH STUDY?

If you have questions about the study, please contact your local research investigator or study staff as listed below:



## Research Consent Form for Non-Clinical Research

Dana-Farber/ Harvard Cancer Center

BIDMC/BCH/BWH/DFCI/MGH/Partners Network Affiliates

OHRS 10.02.2017

### DFCI

- Dr. James Tulsy, PI [Contact Information]
- Julie Goldman, Study Staff [Contact Information]

### MGH

- Dr. Angelo Volandes, [Contact Information]

For questions about your rights as a research participant, please contact a representative of the Office for Human Research Studies at [Insert site name and phone number here] This can include questions about your participation in the study, concerns about the study, a research related injury, or if you feel/felt under pressure to enroll in this research study or to continue to participate in this research study.

### **K. PRIVACY OF PROTECTED HEALTH INFORMATION**

Federal law requires Dana-Farber/Harvard Cancer Center (DF/HCC) and its affiliated research doctors, health care providers, and physician network to protect the privacy of information that identifies you and relates to your past, present, and future physical and mental health conditions (“protected health information”). If you enroll in this research study, your “protected health information” will be used and shared with others as explained below.

#### **1. What protected health information about me will be used or shared with others during this research?**

- Existing medical records, including mental health records.
- New health information created from study-related tests, procedures, visits, and/or questionnaires

#### **2. Why will protected information about me be used or shared with others?**

The main reasons include the following:

- To conduct and oversee the research described earlier in this form;
- To ensure the research meets legal, institutional, and accreditation requirements;

## Research Consent Form for Non-Clinical Research

Dana-Farber/ Harvard Cancer Center

BIDMC/BCH/BWH/DFCI/MGH/Partners Network Affiliates

OHRS 10.02.2017

- To conduct public health activities (including reporting of adverse events or situations where you or others may be at risk of harm); and
- To provide the study sponsor with information arising from an adverse event or other event that relates to the safety or toxicity of the drug(s) used in the study and for the purpose of this or other research relating the study drug and its use in cancer; and,
- To better understand the diseases being studied and to improve the design of future studies; and,
- Other reasons may include for treatment, payment, or health care operations. For example, some medical information produced by this research study may become part of your hospital medical record because the information may be necessary for your medical care. (You will also be given a notice for use and sharing of protected health information.)

### 3. Who will use or share protected health information about me?

- DF/HCC and its affiliated research doctors and entities participating in the research will use and share your protected health information. In addition, other DF/HCC offices that deal with research oversight, billing or quality assurance will be able to use and share your protected health information.

### 4. With whom outside of DF/HCC may my protected health information be shared?

While all reasonable efforts will be made to protect the confidentiality of your protected health information, it may also be shared with the following entities:

- Outside individuals or entities that have a need to access this information to perform functions relating to the conduct of this research such as analysis by outside laboratories on behalf of DF/HCC and its affiliates (for example, data storage companies, insurers, or legal advisors).
- The sponsor(s) of the study, its subcontractors, representatives, business partners, and its agent(s): NIH
- Other research doctors and medical centers participating in this research, if applicable
- Federal and state agencies (for example, the Department of Health and Human Services, the Food and Drug Administration, the National

## Research Consent Form for Non-Clinical Research

Dana-Farber/ Harvard Cancer Center

BIDMC/BCH/BWH/DFCI/MGH/Partners Network Affiliates

OHRs 10.02.2017

Institutes of Health, and/or the Office for Human Research Protections), or other domestic or foreign government bodies if required by law and/or necessary for oversight purposes.

- Hospital accrediting agencies
- A data safety monitoring board organized to oversee this research, if applicable

Some who may receive your protected health information may not have to satisfy the privacy rules and requirements. They, in fact, may share your information with others without your permission.

### 5. For how long will protected health information about me be used or shared with others?

- There is no scheduled date at which your protected health information that is being used or shared for this research will be destroyed, because research is an ongoing process.

### 6. Statement of privacy rights:

- You have the right to withdraw your permission for the research doctors and participating DF/HCC entities to use or share your protected health information. We will not be able to withdraw all the information that already has been used or shared with others to carry out related activities such as oversight, or that is needed to ensure quality of the study. To withdraw your permission, you must do so in writing by contacting the researcher listed above in the section: "Whom do I contact if I have questions about the research study?"
- You have the right to request access to your protected health information that is used or shared during this research and that is related to your treatment or payment for your treatment, but you may access this information only after the study is completed. To request this information, please contact the researcher listed above in the section: "Whom do I contact if I have questions about the research study?"

## Research Consent Form for Non-Clinical Research

Dana-Farber/ Harvard Cancer Center

BIDMC/BCH/BWH/DFCI/MGH/Partners Network Affiliates

OHRs 10.02.2017

### **L. CONSENT TO OPTIONAL RESEARCH STUDIES:**

You are being asked to participate in some optional studies. If you decide not to participate in any of the optional studies, you can still participate in the main research study. Please take your time to make your decision and discuss it with others and your primary care physician.

Your participation in these optional research studies is voluntary, and you will not be penalized or lose any benefits if you refuse to participate or decide to stop.

#### Optional Study #1:

We can share your declaration video with you if you wish to have a copy of it. There are multiple ways we can share your declaration video with you. The options available to you are dependent on the site where you receive your medical care. The safest and most secure way to share the video is either through an encrypted flash drive or through a tool called Dropbox for Business.

- Option 1: We can put your declaration video on an encrypted flash drive which is password protected and provide the flash drive to you; or
- Option 2: We can post your declaration video on a website called Dropbox for Business. You would be provided web link to view your video online. Dana-Farber has more privacy control over this site and can remove your video at any time. Dropbox for Business would require you to follow multiple steps to view your video.

If you prefer to not use Dropbox for Business or receive through an encrypted flash drive, we can still share your declaration video with you.

- Option 3: We can put your declaration video on an unencrypted flash drive which is not password protected and provide the flash drive to you; or
- Option 4: We can post your declaration video on a YouTube unlisted video setting under the study's YouTube account and provide the web link to you. An unlisted video can only be seen and shared by a web link. The

## Research Consent Form for Non-Clinical Research

Dana-Farber/ Harvard Cancer Center

BIDMC/BCH/BWH/DFCI/MGH/Partners Network Affiliates

OHRS 10.02.2017

unlisted video should not be available on YouTube's search results or for people who do not have access to the web link. YouTube is user friendly, and would not require multiple steps to view your video

Please note, for Option 3 and Option 4, we cannot guarantee the confidentiality of your information. For example:

- a. If you lose the unencrypted flash drive it may be recovered and accessible by someone else; or
- b. If the YouTube web link is shared with another person, it may be possible for that person to post your unlisted video to a public playlist or to re-disclose the web link which would then be accessible by others.

I understand if my health information is disclosed to the media or the general public pursuant to this authorization, it is no longer protected by federal or state privacy regulations and may be re-disclosed by the recipient. I further understand that once such materials are in the possession of media or members of the general public, Dana-Farber will have no control over their use.

Please indicate whether or not you want to take part in this optional research study. If you would like to participate in this optional study and receive a copy of your video declaration, please indicate below and also check off the method above which you would like to receive it by.

Not applicable

Yes \_\_\_\_\_ Initials \_\_\_\_\_ Date

No \_\_\_\_\_ Initials \_\_\_\_\_ Date

## Research Consent Form for Non-Clinical Research

Dana-Farber/ Harvard Cancer Center

BIDMC/BCH/BWH/DFCI/MGH/Partners Network Affiliates

OHRS 10.02.2017

### Optional Study #2:

There are times when the research team would like to share patients' videos with their colleagues, in scientific presentations or to train study staff. Would you be comfortable in sharing your video publicly for purposes like this? The risk is that the video could be widely shared, depending on the venue, and we will not have any control over this. We will not be analyzing anything so there will be no results.

I understand if my health information is disclosed to the media or the general public pursuant to this authorization, it is no longer protected by federal or state privacy regulations and may be re-disclosed by the recipient. I further understand that once such materials are in the possession of media or members of the general public, Dana-Farber will have no control over their use.

Please indicate whether or not you want to take part in this optional research study.

Not applicable

Yes \_\_\_\_\_ Initials \_\_\_\_\_ Date

No \_\_\_\_\_ Initials \_\_\_\_\_ Date

**Research Consent Form for Non-Clinical Research**

Dana-Farber/ Harvard Cancer Center

BIDMC/BCH/BWH/DFCI/MGH/Partners Network Affiliates

OHRS 10.02.2017

**N. Documentation of Consent**

My signature below indicates:

- I have had enough time to read the consent and think about participating in this study;
- I have had all of my questions answered to my satisfaction;
- I am willing to participate in this study;
- I have been told that my participation is voluntary and I can withdraw at any time

\_\_\_\_\_  
Signature of Participant  
or Legally Authorized Representative

\_\_\_\_\_  
Date

\_\_\_\_\_  
Relationship of Legally Authorized Representative to Participant

## Research Consent Form for Non-Clinical Research

Dana-Farber/ Harvard Cancer Center  
 BIDMC/BCH/BWH/DFCI/MGH/Partners Network Affiliates

OHRS 10.02.2017

### Adult Participants

#### To be completed by person obtaining consent:

The consent discussion was initiated on \_\_\_\_\_ (date).

Signature of individual obtaining consent: \_\_\_\_\_

Printed name of above: \_\_\_\_\_

Date: \_\_\_\_\_

- A copy of this signed consent form will be given to the participant or legally authorized representative, or, where the participant is a minor, the participant's parent or legal guardian.

#### For Adult Participants

- 1) The participant is an adult and provided consent to participate.
- 1a) Participant (or legally authorized representative) is a non-English speaker and signed the translated Short Form in lieu of English consent document:

*As someone who understands both English and the language spoken by the participant, I interpreted and/or witnessed, in the participant's language, the researcher's presentation of the English consent form. The participant was given the opportunity to ask questions.*

Signature of Interpreter/Witness: \_\_\_\_\_

Printed Name of Interpreter/Witness: \_\_\_\_\_

Date: \_\_\_\_\_

- 1b) Participant is physically unable to sign the consent form because:
- The participant is illiterate.
- The participant has a physical disability.
- Other (please describe): \_\_\_\_\_

*The consent form was read to the participant who was given the opportunity to ask questions and who communicated agreement to participate in the research.*

Signature of Witness: \_\_\_\_\_

Printed Name of Witness: \_\_\_\_\_

Date: \_\_\_\_\_



1  
2  
3  
4  
5  
6  
7  
8  
9  
10  
11  
12  
13  
14  
15  
16  
17  
18  
19  
20  
21  
22  
23  
24  
25  
26  
27  
28  
29  
30  
31  
32  
33  
34  
35  
36  
37  
38  
39  
40  
41  
42  
43  
44  
45  
46  
47  
48  
49  
50  
51  
52  
53  
54  
55  
56  
57  
58  
59  
60

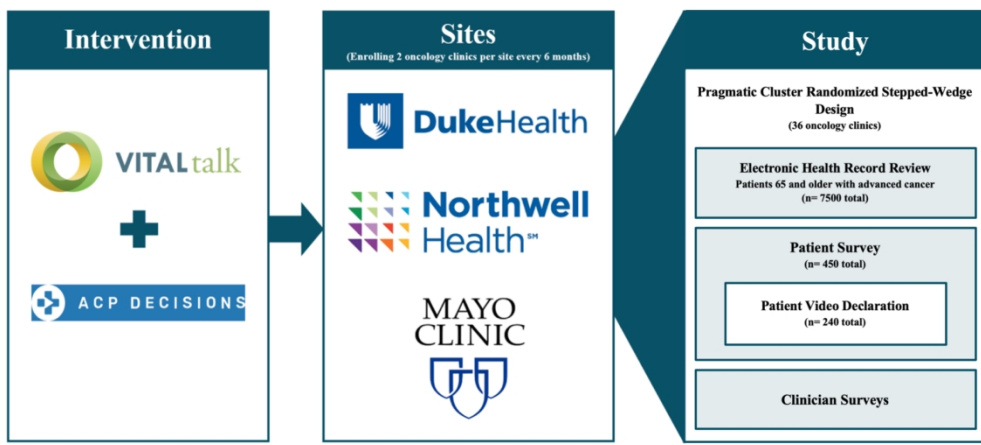

ACP Peace Model

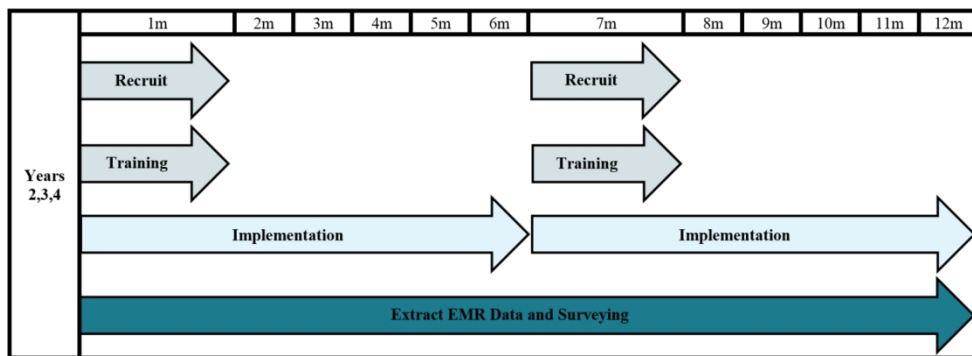

Stepped-Wedge Recruitment and Implementation Yearly Timeline (repeated each year)

1  
2  
3  
4  
5  
6  
7  
8  
9  
10  
11  
12  
13  
14  
15  
16  
17  
18  
19  
20  
21  
22  
23  
24  
25  
26  
27  
28  
29  
30  
31  
32  
33  
34  
35  
36  
37  
38  
39  
40  
41  
42  
43  
44  
45  
46  
47  
48  
49  
50  
51  
52  
53  
54  
55  
56  
57  
58  
59  
60

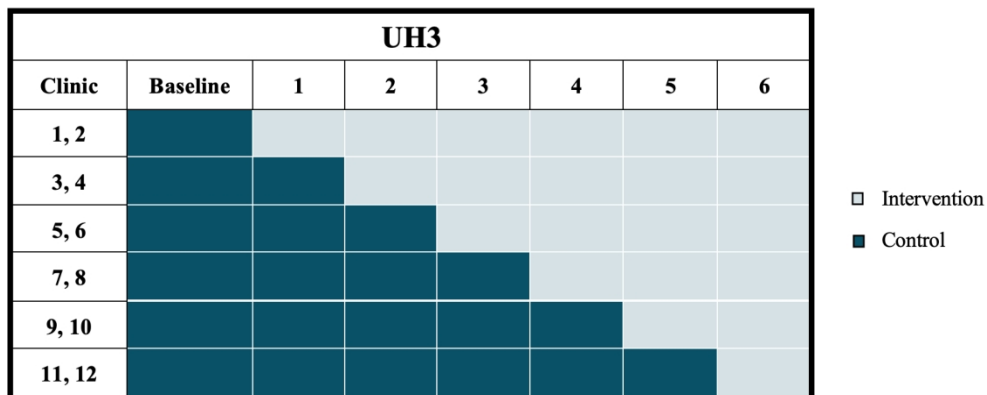

Original Stepped-wedge Cluster Randomization Scheme within Each Health Care System

1  
2  
3  
4  
5  
6  
7  
8  
9  
10  
11  
12  
13  
14  
15  
16  
17  
18  
19  
20  
21  
22  
23  
24  
25  
26  
27  
28  
29  
30  
31  
32  
33  
34  
35  
36  
37  
38  
39  
40  
41  
42  
43  
44  
45  
46  
47  
48  
49  
50  
51  
52  
53  
54  
55  
56  
57  
58  
59  
60

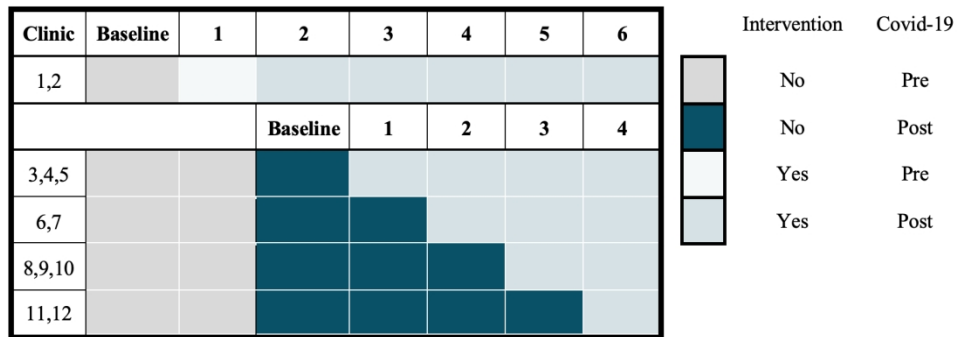

Modified Stepped-wedge Cluster Randomization Scheme within Each Health Care System

# Reporting checklist for protocol of a clinical trial.

Based on the SPIRIT guidelines.

## Instructions to authors

Complete this checklist by entering the page numbers from your manuscript where readers will find each of the items listed below.

Your article may not currently address all the items on the checklist. Please modify your text to include the missing information. If you are certain that an item does not apply, please write "n/a" and provide a short explanation.

Upload your completed checklist as an extra file when you submit to a journal.

In your methods section, say that you used the SPIRIT reporting guidelines, and cite them as:

Chan A-W, Tetzlaff JM, Altman DG, Laupacis A, Gøtzsche PC, Krleža-Jerić K, Hróbjartsson A, Mann H, Dickersin K, Berlin J, Doré C, Parulekar W, Summerskill W, Groves T, Schulz K, Sox H, Rockhold FW, Rennie D, Moher D. SPIRIT 2013 Statement: Defining standard protocol items for clinical trials. *Ann Intern Med.* 2013;158(3):200-207

|                                   | Reporting Item                                                                                                                  | Page Number |
|-----------------------------------|---------------------------------------------------------------------------------------------------------------------------------|-------------|
| <b>Administrative information</b> |                                                                                                                                 |             |
| Title                             | <a href="#">#1</a> Descriptive title identifying the study design, population, interventions, and, if applicable, trial acronym | 1           |
| Trial registration                | <a href="#">#2a</a> Trial identifier and registry name. If not yet registered, name of intended registry                        | 19          |
| Trial registration: data set      | <a href="#">#2b</a> All items from the World Health Organization Trial Registration Data Set                                    | 1, 19       |
| Protocol version                  | <a href="#">#3</a> Date and version identifier                                                                                  | 2           |
| Funding                           | <a href="#">#4</a> Sources and types of financial, material, and other support                                                  | 2           |

|    |                      |                     |                                                  |          |
|----|----------------------|---------------------|--------------------------------------------------|----------|
| 1  | Roles and            | <a href="#">#5a</a> | Names, affiliations, and roles of protocol       | 1, 22-23 |
| 2  | responsibilities:    |                     | contributors                                     |          |
| 3  | contributorship      |                     |                                                  |          |
| 4  |                      |                     |                                                  |          |
| 5  |                      |                     |                                                  |          |
| 6  | Roles and            | <a href="#">#5b</a> | Name and contact information for the trial       | 1        |
| 7  | responsibilities:    |                     | sponsor                                          |          |
| 8  | sponsor contact      |                     |                                                  |          |
| 9  | information          |                     |                                                  |          |
| 10 |                      |                     |                                                  |          |
| 11 |                      |                     |                                                  |          |
| 12 |                      |                     |                                                  |          |
| 13 | Roles and            | <a href="#">#5c</a> | Role of study sponsor and funders, if any, in    | 2        |
| 14 | responsibilities:    |                     | study design; collection, management,            |          |
| 15 | sponsor and funder   |                     | analysis, and interpretation of data; writing    |          |
| 16 |                      |                     | of the report; and the decision to submit the    |          |
| 17 |                      |                     | report for publication, including whether        |          |
| 18 |                      |                     | they will have ultimate authority over any of    |          |
| 19 |                      |                     | these activities                                 |          |
| 20 |                      |                     |                                                  |          |
| 21 |                      |                     |                                                  |          |
| 22 |                      |                     |                                                  |          |
| 23 |                      |                     |                                                  |          |
| 24 | Roles and            | <a href="#">#5d</a> | Composition, roles, and responsibilities of      | 20       |
| 25 | responsibilities:    |                     | the coordinating centre, steering committee,     |          |
| 26 | committees           |                     | endpoint adjudication committee, data            |          |
| 27 |                      |                     | management team, and other individuals or        |          |
| 28 |                      |                     | groups overseeing the trial, if applicable (see  |          |
| 29 |                      |                     | Item 21a for data monitoring committee)          |          |
| 30 |                      |                     |                                                  |          |
| 31 |                      |                     |                                                  |          |
| 32 |                      |                     |                                                  |          |
| 33 |                      |                     |                                                  |          |
| 34 | <b>Introduction</b>  |                     |                                                  |          |
| 35 |                      |                     |                                                  |          |
| 36 | Background and       | <a href="#">#6a</a> | Description of research question and             | 5-6      |
| 37 | rationale            |                     | justification for undertaking the trial,         |          |
| 38 |                      |                     | including summary of relevant studies            |          |
| 39 |                      |                     | (published and unpublished) examining            |          |
| 40 |                      |                     | benefits and harms for each intervention         |          |
| 41 |                      |                     |                                                  |          |
| 42 |                      |                     |                                                  |          |
| 43 |                      |                     |                                                  |          |
| 44 |                      |                     |                                                  |          |
| 45 | Background and       | <a href="#">#6b</a> | Explanation for choice of comparators            | 6-8      |
| 46 | rationale: choice of |                     |                                                  |          |
| 47 | comparators          |                     |                                                  |          |
| 48 |                      |                     |                                                  |          |
| 49 |                      |                     |                                                  |          |
| 50 | Objectives           | <a href="#">#7</a>  | Specific objectives or hypotheses                | 6        |
| 51 |                      |                     |                                                  |          |
| 52 | Trial design         | <a href="#">#8</a>  | Description of trial design including type of    | 6        |
| 53 |                      |                     | trial (eg, parallel group, crossover, factorial, |          |
| 54 |                      |                     | single group), allocation ratio, and             |          |
| 55 |                      |                     | framework (eg, superiority, equivalence,         |          |
| 56 |                      |                     | non-inferiority, exploratory)                    |          |
| 57 |                      |                     |                                                  |          |
| 58 |                      |                     |                                                  |          |
| 59 |                      |                     |                                                  |          |
| 60 |                      |                     |                                                  |          |

**Methods:****Participants,  
interventions, and  
outcomes**

|                                    |                      |                                                                                                                                                                                                                                                                    |                                                                                |
|------------------------------------|----------------------|--------------------------------------------------------------------------------------------------------------------------------------------------------------------------------------------------------------------------------------------------------------------|--------------------------------------------------------------------------------|
| Study setting                      | <a href="#">#9</a>   | Description of study settings (eg, community clinic, academic hospital) and list of countries where data will be collected. Reference to where list of study sites can be obtained                                                                                 | 7-8                                                                            |
| Eligibility criteria               | <a href="#">#10</a>  | Inclusion and exclusion criteria for participants. If applicable, eligibility criteria for study centres and individuals who will perform the interventions (eg, surgeons, psychotherapists)                                                                       | 8-9                                                                            |
| Interventions:<br>description      | <a href="#">#11a</a> | Interventions for each group with sufficient detail to allow replication, including how and when they will be administered                                                                                                                                         | 7, 9-11                                                                        |
| Interventions:<br>modifications    | <a href="#">#11b</a> | Criteria for discontinuing or modifying allocated interventions for a given trial participant (eg, drug dose change in response to harms, participant request, or improving / worsening disease)                                                                   | 9-11                                                                           |
| Interventions:<br>adherence        | <a href="#">#11c</a> | Strategies to improve adherence to intervention protocols, and any procedures for monitoring adherence (eg, drug tablet return; laboratory tests)                                                                                                                  | 9-11                                                                           |
| Interventions:<br>concomitant care | <a href="#">#11d</a> | Relevant concomitant care and interventions that are permitted or prohibited during the trial                                                                                                                                                                      | <i>N/A: Patients are receiving the standard of care, non-controlled trial.</i> |
| Outcomes                           | <a href="#">#12</a>  | Primary, secondary, and other outcomes, including the specific measurement variable (eg, systolic blood pressure), analysis metric (eg, change from baseline, final value, time to event), method of aggregation (eg, median, proportion), and time point for each | 12-13                                                                          |

outcome. Explanation of the clinical relevance of chosen efficacy and harm outcomes is strongly recommended

|    |                      |                     |                                                                                                                                                                                                                                  |
|----|----------------------|---------------------|----------------------------------------------------------------------------------------------------------------------------------------------------------------------------------------------------------------------------------|
| 1  |                      |                     |                                                                                                                                                                                                                                  |
| 2  |                      |                     |                                                                                                                                                                                                                                  |
| 3  |                      |                     |                                                                                                                                                                                                                                  |
| 4  |                      |                     |                                                                                                                                                                                                                                  |
| 5  | Participant timeline | <a href="#">#13</a> | Time schedule of enrolment, interventions (including any run-ins and washouts), assessments, and visits for participants. A schematic diagram is highly recommended (see Figure)                                                 |
| 6  |                      |                     | 7-8, See Figure 3a,b                                                                                                                                                                                                             |
| 7  |                      |                     |                                                                                                                                                                                                                                  |
| 8  |                      |                     |                                                                                                                                                                                                                                  |
| 9  |                      |                     |                                                                                                                                                                                                                                  |
| 10 |                      |                     |                                                                                                                                                                                                                                  |
| 11 |                      |                     |                                                                                                                                                                                                                                  |
| 12 |                      |                     |                                                                                                                                                                                                                                  |
| 13 |                      |                     |                                                                                                                                                                                                                                  |
| 14 | Sample size          | <a href="#">#14</a> | Estimated number of participants needed to achieve study objectives and how it was determined, including clinical and statistical assumptions supporting any sample size calculations                                            |
| 15 |                      |                     | 18-19                                                                                                                                                                                                                            |
| 16 |                      |                     |                                                                                                                                                                                                                                  |
| 17 |                      |                     |                                                                                                                                                                                                                                  |
| 18 |                      |                     |                                                                                                                                                                                                                                  |
| 19 |                      |                     |                                                                                                                                                                                                                                  |
| 20 |                      |                     |                                                                                                                                                                                                                                  |
| 21 |                      |                     |                                                                                                                                                                                                                                  |
| 22 | Recruitment          | <a href="#">#15</a> | Strategies for achieving adequate participant enrolment to reach target sample size                                                                                                                                              |
| 23 |                      |                     | <i>N/A: In this pragmatic trial, all individuals who meet criteria and do not opt out are included in the analysis rather than individual patient recruitment. We have included the description of our population on page 8.</i> |
| 24 |                      |                     |                                                                                                                                                                                                                                  |
| 25 |                      |                     |                                                                                                                                                                                                                                  |
| 26 |                      |                     |                                                                                                                                                                                                                                  |
| 27 |                      |                     |                                                                                                                                                                                                                                  |
| 28 |                      |                     |                                                                                                                                                                                                                                  |
| 29 |                      |                     |                                                                                                                                                                                                                                  |
| 30 |                      |                     |                                                                                                                                                                                                                                  |
| 31 |                      |                     |                                                                                                                                                                                                                                  |
| 32 |                      |                     |                                                                                                                                                                                                                                  |
| 33 |                      |                     |                                                                                                                                                                                                                                  |
| 34 |                      |                     |                                                                                                                                                                                                                                  |

## Methods:

### Assignment of interventions (for controlled trials)

|    |                     |                      |                                                                                                                                                                                                                                                                                                                                                          |
|----|---------------------|----------------------|----------------------------------------------------------------------------------------------------------------------------------------------------------------------------------------------------------------------------------------------------------------------------------------------------------------------------------------------------------|
| 35 |                     |                      |                                                                                                                                                                                                                                                                                                                                                          |
| 36 |                     |                      |                                                                                                                                                                                                                                                                                                                                                          |
| 37 |                     |                      |                                                                                                                                                                                                                                                                                                                                                          |
| 38 |                     |                      |                                                                                                                                                                                                                                                                                                                                                          |
| 39 |                     |                      |                                                                                                                                                                                                                                                                                                                                                          |
| 40 |                     |                      |                                                                                                                                                                                                                                                                                                                                                          |
| 41 |                     |                      |                                                                                                                                                                                                                                                                                                                                                          |
| 42 | Allocation:         | <a href="#">#16a</a> | Method of generating the allocation sequence (eg, computer-generated random numbers), and list of any factors for stratification. To reduce predictability of a random sequence, details of any planned restriction (eg, blocking) should be provided in a separate document that is unavailable to those who enrol participants or assign interventions |
| 43 | sequence generation |                      | 7-8                                                                                                                                                                                                                                                                                                                                                      |
| 44 |                     |                      |                                                                                                                                                                                                                                                                                                                                                          |
| 45 |                     |                      |                                                                                                                                                                                                                                                                                                                                                          |
| 46 |                     |                      |                                                                                                                                                                                                                                                                                                                                                          |
| 47 |                     |                      |                                                                                                                                                                                                                                                                                                                                                          |
| 48 |                     |                      |                                                                                                                                                                                                                                                                                                                                                          |
| 49 |                     |                      |                                                                                                                                                                                                                                                                                                                                                          |
| 50 |                     |                      |                                                                                                                                                                                                                                                                                                                                                          |
| 51 |                     |                      |                                                                                                                                                                                                                                                                                                                                                          |
| 52 |                     |                      |                                                                                                                                                                                                                                                                                                                                                          |
| 53 |                     |                      |                                                                                                                                                                                                                                                                                                                                                          |
| 54 |                     |                      |                                                                                                                                                                                                                                                                                                                                                          |
| 55 |                     |                      |                                                                                                                                                                                                                                                                                                                                                          |
| 56 |                     |                      |                                                                                                                                                                                                                                                                                                                                                          |
| 57 |                     |                      |                                                                                                                                                                                                                                                                                                                                                          |
| 58 |                     |                      |                                                                                                                                                                                                                                                                                                                                                          |
| 59 |                     |                      |                                                                                                                                                                                                                                                                                                                                                          |
| 60 |                     |                      |                                                                                                                                                                                                                                                                                                                                                          |



|    |                        |                      |                                                |                                        |
|----|------------------------|----------------------|------------------------------------------------|----------------------------------------|
| 1  | Allocation             | <a href="#">#16b</a> | Mechanism of implementing the allocation       | 7-8                                    |
| 2  | concealment            |                      | sequence (eg, central telephone; sequentially  |                                        |
| 3  |                        |                      | numbered, opaque, sealed envelopes),           |                                        |
| 4  | mechanism              |                      | describing any steps to conceal the sequence   |                                        |
| 5  |                        |                      | until interventions are assigned               |                                        |
| 6  |                        |                      |                                                |                                        |
| 7  |                        |                      |                                                |                                        |
| 8  |                        |                      |                                                |                                        |
| 9  | Allocation:            | <a href="#">#16c</a> | Who will generate the allocation sequence,     | 7-9                                    |
| 10 | implementation         |                      | who will enrol participants, and who will      |                                        |
| 11 |                        |                      | assign participants to interventions           |                                        |
| 12 |                        |                      |                                                |                                        |
| 13 |                        |                      |                                                |                                        |
| 14 | Blinding (masking)     | <a href="#">#17a</a> | Who will be blinded after assignment to        | 15                                     |
| 15 |                        |                      | interventions (eg, trial participants, care    |                                        |
| 16 |                        |                      | providers, outcome assessors, data analysts),  |                                        |
| 17 |                        |                      | and how                                        |                                        |
| 18 |                        |                      |                                                |                                        |
| 19 |                        |                      |                                                |                                        |
| 20 |                        |                      |                                                |                                        |
| 21 | Blinding (masking):    | <a href="#">#17b</a> | If blinded, circumstances under which          | 15                                     |
| 22 | emergency              |                      | unblinding is permissible, and procedure for   |                                        |
| 23 | unblinding             |                      | revealing a participant's allocated            |                                        |
| 24 |                        |                      | intervention during the trial                  |                                        |
| 25 |                        |                      |                                                |                                        |
| 26 |                        |                      |                                                |                                        |
| 27 |                        |                      |                                                |                                        |
| 28 | <b>Methods: Data</b>   |                      |                                                |                                        |
| 29 | <b>collection,</b>     |                      |                                                |                                        |
| 30 | <b>management, and</b> |                      |                                                |                                        |
| 31 | <b>analysis</b>        |                      |                                                |                                        |
| 32 |                        |                      |                                                |                                        |
| 33 |                        |                      |                                                |                                        |
| 34 |                        |                      |                                                |                                        |
| 35 | Data collection plan   | <a href="#">#18a</a> | Plans for assessment and collection of         | 8-9, 12-15                             |
| 36 |                        |                      | outcome, baseline, and other trial data,       |                                        |
| 37 |                        |                      | including any related processes to promote     |                                        |
| 38 |                        |                      | data quality (eg, duplicate measurements,      |                                        |
| 39 |                        |                      | training of assessors) and a description of    |                                        |
| 40 |                        |                      | study instruments (eg, questionnaires,         |                                        |
| 41 |                        |                      | laboratory tests) along with their reliability |                                        |
| 42 |                        |                      | and validity, if known. Reference to where     |                                        |
| 43 |                        |                      | data collection forms can be found, if not in  |                                        |
| 44 |                        |                      | the protocol                                   |                                        |
| 45 |                        |                      |                                                |                                        |
| 46 |                        |                      |                                                |                                        |
| 47 |                        |                      |                                                |                                        |
| 48 |                        |                      |                                                |                                        |
| 49 |                        |                      |                                                |                                        |
| 50 |                        |                      |                                                |                                        |
| 51 | Data collection        | <a href="#">#18b</a> | Plans to promote participant retention and     | <i>N/A; The unit of randomization</i>  |
| 52 | plan: retention        |                      | complete follow-up, including list of any      | <i>is the clinic and all eligible</i>  |
| 53 |                        |                      | outcome data to be collected for participants  | <i>individuals who do not choose</i>   |
| 54 |                        |                      | who discontinue or deviate from intervention   | <i>to opt out are included and are</i> |
| 55 |                        |                      | protocols                                      | <i>not followed up over time.</i>      |
| 56 |                        |                      |                                                |                                        |
| 57 |                        |                      |                                                |                                        |
| 58 |                        |                      |                                                |                                        |
| 59 |                        |                      |                                                |                                        |
| 60 |                        |                      |                                                |                                        |

|    |                                                  |                      |                                                                                                                                                                                                                                                                                                                                       |           |
|----|--------------------------------------------------|----------------------|---------------------------------------------------------------------------------------------------------------------------------------------------------------------------------------------------------------------------------------------------------------------------------------------------------------------------------------|-----------|
| 1  | Data management                                  | <a href="#">#19</a>  | Plans for data entry, coding, security, and storage, including any related processes to promote data quality (eg, double data entry; range checks for data values). Reference to where details of data management procedures can be found, if not in the protocol                                                                     | 8, 13-15  |
| 2  |                                                  |                      |                                                                                                                                                                                                                                                                                                                                       |           |
| 3  |                                                  |                      |                                                                                                                                                                                                                                                                                                                                       |           |
| 4  |                                                  |                      |                                                                                                                                                                                                                                                                                                                                       |           |
| 5  |                                                  |                      |                                                                                                                                                                                                                                                                                                                                       |           |
| 6  |                                                  |                      |                                                                                                                                                                                                                                                                                                                                       |           |
| 7  |                                                  |                      |                                                                                                                                                                                                                                                                                                                                       |           |
| 8  |                                                  |                      |                                                                                                                                                                                                                                                                                                                                       |           |
| 9  |                                                  |                      |                                                                                                                                                                                                                                                                                                                                       |           |
| 10 |                                                  |                      |                                                                                                                                                                                                                                                                                                                                       |           |
| 11 |                                                  |                      |                                                                                                                                                                                                                                                                                                                                       |           |
| 12 | Statistics: outcomes                             | <a href="#">#20a</a> | Statistical methods for analysing primary and secondary outcomes. Reference to where other details of the statistical analysis plan can be found, if not in the protocol                                                                                                                                                              | 15-18     |
| 13 |                                                  |                      |                                                                                                                                                                                                                                                                                                                                       |           |
| 14 |                                                  |                      |                                                                                                                                                                                                                                                                                                                                       |           |
| 15 |                                                  |                      |                                                                                                                                                                                                                                                                                                                                       |           |
| 16 |                                                  |                      |                                                                                                                                                                                                                                                                                                                                       |           |
| 17 |                                                  |                      |                                                                                                                                                                                                                                                                                                                                       |           |
| 18 |                                                  |                      |                                                                                                                                                                                                                                                                                                                                       |           |
| 19 | Statistics: additional analyses                  | <a href="#">#20b</a> | Methods for any additional analyses (eg, subgroup and adjusted analyses)                                                                                                                                                                                                                                                              | 15-18     |
| 20 |                                                  |                      |                                                                                                                                                                                                                                                                                                                                       |           |
| 21 |                                                  |                      |                                                                                                                                                                                                                                                                                                                                       |           |
| 22 |                                                  |                      |                                                                                                                                                                                                                                                                                                                                       |           |
| 23 | Statistics: analysis population and missing data | <a href="#">#20c</a> | Definition of analysis population relating to protocol non-adherence (eg, as randomised analysis), and any statistical methods to handle missing data (eg, multiple imputation)                                                                                                                                                       | 15-18     |
| 24 |                                                  |                      |                                                                                                                                                                                                                                                                                                                                       |           |
| 25 |                                                  |                      |                                                                                                                                                                                                                                                                                                                                       |           |
| 26 |                                                  |                      |                                                                                                                                                                                                                                                                                                                                       |           |
| 27 |                                                  |                      |                                                                                                                                                                                                                                                                                                                                       |           |
| 28 |                                                  |                      |                                                                                                                                                                                                                                                                                                                                       |           |
| 29 |                                                  |                      |                                                                                                                                                                                                                                                                                                                                       |           |
| 30 |                                                  |                      |                                                                                                                                                                                                                                                                                                                                       |           |
| 31 | <b>Methods:</b>                                  |                      |                                                                                                                                                                                                                                                                                                                                       |           |
| 32 | <b>Monitoring</b>                                |                      |                                                                                                                                                                                                                                                                                                                                       |           |
| 33 |                                                  |                      |                                                                                                                                                                                                                                                                                                                                       |           |
| 34 |                                                  |                      |                                                                                                                                                                                                                                                                                                                                       |           |
| 35 | Data monitoring: formal committee                | <a href="#">#21a</a> | Composition of data monitoring committee (DMC); summary of its role and reporting structure; statement of whether it is independent from the sponsor and competing interests; and reference to where further details about its charter can be found, if not in the protocol. Alternatively, an explanation of why a DMC is not needed | 15, 19-20 |
| 36 |                                                  |                      |                                                                                                                                                                                                                                                                                                                                       |           |
| 37 |                                                  |                      |                                                                                                                                                                                                                                                                                                                                       |           |
| 38 |                                                  |                      |                                                                                                                                                                                                                                                                                                                                       |           |
| 39 |                                                  |                      |                                                                                                                                                                                                                                                                                                                                       |           |
| 40 |                                                  |                      |                                                                                                                                                                                                                                                                                                                                       |           |
| 41 |                                                  |                      |                                                                                                                                                                                                                                                                                                                                       |           |
| 42 |                                                  |                      |                                                                                                                                                                                                                                                                                                                                       |           |
| 43 |                                                  |                      |                                                                                                                                                                                                                                                                                                                                       |           |
| 44 |                                                  |                      |                                                                                                                                                                                                                                                                                                                                       |           |
| 45 |                                                  |                      |                                                                                                                                                                                                                                                                                                                                       |           |
| 46 |                                                  |                      |                                                                                                                                                                                                                                                                                                                                       |           |
| 47 |                                                  |                      |                                                                                                                                                                                                                                                                                                                                       |           |
| 48 | Data monitoring: interim analysis                | <a href="#">#21b</a> | Description of any interim analyses and stopping guidelines, including who will have access to these interim results and make the final decision to terminate the trial                                                                                                                                                               | 14        |
| 49 |                                                  |                      |                                                                                                                                                                                                                                                                                                                                       |           |
| 50 |                                                  |                      |                                                                                                                                                                                                                                                                                                                                       |           |
| 51 |                                                  |                      |                                                                                                                                                                                                                                                                                                                                       |           |
| 52 |                                                  |                      |                                                                                                                                                                                                                                                                                                                                       |           |
| 53 |                                                  |                      |                                                                                                                                                                                                                                                                                                                                       |           |
| 54 | Harms                                            | <a href="#">#22</a>  | Plans for collecting, assessing, reporting, and managing solicited and spontaneously                                                                                                                                                                                                                                                  | 19        |
| 55 |                                                  |                      |                                                                                                                                                                                                                                                                                                                                       |           |
| 56 |                                                  |                      |                                                                                                                                                                                                                                                                                                                                       |           |
| 57 |                                                  |                      |                                                                                                                                                                                                                                                                                                                                       |           |
| 58 |                                                  |                      |                                                                                                                                                                                                                                                                                                                                       |           |
| 59 |                                                  |                      |                                                                                                                                                                                                                                                                                                                                       |           |
| 60 |                                                  |                      |                                                                                                                                                                                                                                                                                                                                       |           |

|    |                      |                                                                   |              |
|----|----------------------|-------------------------------------------------------------------|--------------|
| 1  |                      | reported adverse events and other unintended                      |              |
| 2  |                      | effects of trial interventions or trial conduct                   |              |
| 3  |                      |                                                                   |              |
| 4  | Auditing             | <a href="#">#23</a> Frequency and procedures for auditing trial   | 19-20        |
| 5  |                      | conduct, if any, and whether the process will                     |              |
| 6  |                      | be independent from investigators and the                         |              |
| 7  |                      | sponsor                                                           |              |
| 8  |                      |                                                                   |              |
| 9  |                      |                                                                   |              |
| 10 |                      |                                                                   |              |
| 11 | <b>Ethics and</b>    |                                                                   |              |
| 12 | <b>dissemination</b> |                                                                   |              |
| 13 |                      |                                                                   |              |
| 14 | Research ethics      | <a href="#">#24</a> Plans for seeking research ethics committee / | 19-20        |
| 15 | approval             | institutional review board (REC / IRB)                            |              |
| 16 |                      | approval                                                          |              |
| 17 |                      |                                                                   |              |
| 18 |                      |                                                                   |              |
| 19 |                      |                                                                   |              |
| 20 | Protocol             | <a href="#">#25</a> Plans for communicating important protocol    | 19-20        |
| 21 | amendments           | modifications (eg, changes to eligibility                         |              |
| 22 |                      | criteria, outcomes, analyses) to relevant                         |              |
| 23 |                      | parties (eg, investigators, REC / IRBs, trial                     |              |
| 24 |                      | participants, trial registries, journals,                         |              |
| 25 |                      | regulators)                                                       |              |
| 26 |                      |                                                                   |              |
| 27 |                      |                                                                   |              |
| 28 |                      |                                                                   |              |
| 29 |                      |                                                                   |              |
| 30 | Consent or assent    | <a href="#">#26a</a> Who will obtain informed consent or assent   | 20           |
| 31 |                      | from potential trial participants or authorised                   |              |
| 32 |                      | surrogates, and how (see Item 32)                                 |              |
| 33 |                      |                                                                   |              |
| 34 |                      |                                                                   |              |
| 35 | Consent or assent:   | <a href="#">#26b</a> Additional consent provisions for collection | N/A          |
| 36 | ancillary studies    | and use of participant data and biological                        |              |
| 37 |                      | specimens in ancillary studies, if applicable                     |              |
| 38 |                      |                                                                   |              |
| 39 |                      |                                                                   |              |
| 40 | Confidentiality      | <a href="#">#27</a> How personal information about potential      | 14-15, 19-20 |
| 41 |                      | and enrolled participants will be collected,                      |              |
| 42 |                      | shared, and maintained in order to protect                        |              |
| 43 |                      | confidentiality before, during, and after the                     |              |
| 44 |                      | trial                                                             |              |
| 45 |                      |                                                                   |              |
| 46 |                      |                                                                   |              |
| 47 |                      |                                                                   |              |
| 48 |                      |                                                                   |              |
| 49 | Declaration of       | <a href="#">#28</a> Financial and other competing interests for   | 22           |
| 50 | interests            | principal investigators for the overall trial                     |              |
| 51 |                      | and each study site                                               |              |
| 52 |                      |                                                                   |              |
| 53 |                      |                                                                   |              |
| 54 | Data access          | <a href="#">#29</a> Statement of who will have access to the      | 15           |
| 55 |                      | final trial dataset, and disclosure of                            |              |
| 56 |                      | contractual agreements that limit such access                     |              |
| 57 |                      | for investigators                                                 |              |
| 58 |                      |                                                                   |              |
| 59 |                      |                                                                   |              |
| 60 |                      |                                                                   |              |

|    |                       |                      |                                                   |                 |
|----|-----------------------|----------------------|---------------------------------------------------|-----------------|
| 1  | Ancillary and post    | <a href="#">#30</a>  | Provisions, if any, for ancillary and post-trial  | <i>N/A</i>      |
| 2  | trial care            |                      | care, and for compensation to those who           |                 |
| 3  |                       |                      | suffer harm from trial participation              |                 |
| 4  |                       |                      |                                                   |                 |
| 5  |                       |                      |                                                   |                 |
| 6  | Dissemination         | <a href="#">#31a</a> | Plans for investigators and sponsor to            | <i>20-21</i>    |
| 7  | policy: trial results |                      | communicate trial results to participants,        |                 |
| 8  |                       |                      | healthcare professionals, the public, and         |                 |
| 9  |                       |                      | other relevant groups (eg, via publication,       |                 |
| 10 |                       |                      | reporting in results databases, or other data     |                 |
| 11 |                       |                      | sharing arrangements), including any              |                 |
| 12 |                       |                      | publication restrictions                          |                 |
| 13 |                       |                      |                                                   |                 |
| 14 |                       |                      |                                                   |                 |
| 15 |                       |                      |                                                   |                 |
| 16 |                       |                      |                                                   |                 |
| 17 | Dissemination         | <a href="#">#31b</a> | Authorship eligibility guidelines and any         | <i>22-23</i>    |
| 18 | policy: authorship    |                      | intended use of professional writers              |                 |
| 19 |                       |                      |                                                   |                 |
| 20 |                       |                      |                                                   |                 |
| 21 | Dissemination         | <a href="#">#31c</a> | Plans, if any, for granting public access to      | <i>N/A</i>      |
| 22 | policy: reproducible  |                      | the full protocol, participant-level dataset,     |                 |
| 23 | research              |                      | and statistical code                              |                 |
| 24 |                       |                      |                                                   |                 |
| 25 |                       |                      |                                                   |                 |
| 26 |                       |                      |                                                   |                 |
| 27 | <b>Appendices</b>     |                      |                                                   |                 |
| 28 |                       |                      |                                                   |                 |
| 29 | Informed consent      | <a href="#">#32</a>  | Model consent form and other related              | <i>Appendix</i> |
| 30 | materials             |                      | documentation given to participants and           |                 |
| 31 |                       |                      | authorised surrogates                             |                 |
| 32 |                       |                      |                                                   |                 |
| 33 |                       |                      |                                                   |                 |
| 34 | Biological            | <a href="#">#33</a>  | Plans for collection, laboratory evaluation,      | <i>N/A</i>      |
| 35 | specimens             |                      | and storage of biological specimens for           |                 |
| 36 |                       |                      | genetic or molecular analysis in the current      |                 |
| 37 |                       |                      | trial and for future use in ancillary studies, if |                 |
| 38 |                       |                      | applicable                                        |                 |
| 39 |                       |                      |                                                   |                 |
| 40 |                       |                      |                                                   |                 |
| 41 |                       |                      |                                                   |                 |
| 42 |                       |                      |                                                   |                 |

None The SPIRIT checklist is distributed under the terms of the Creative Commons Attribution License CC-BY-ND 3.0. This checklist can be completed online using <https://www.goodreports.org/>, a tool made by the [EQUATOR Network](#) in collaboration with [Penelope.ai](#)

# BMJ Open

**Advance Care Planning: Promoting Effective and Aligned Communication in the Elderly (ACP-PEACE)**  
**The study protocol for a pragmatic stepped-wedge trial of older patients with cancer**

|                                 |                                                                                                                                                                                                                                                                                                                                                                                                                                                                                                                                                                                                                                                                                                                                                                                                                                                                           |
|---------------------------------|---------------------------------------------------------------------------------------------------------------------------------------------------------------------------------------------------------------------------------------------------------------------------------------------------------------------------------------------------------------------------------------------------------------------------------------------------------------------------------------------------------------------------------------------------------------------------------------------------------------------------------------------------------------------------------------------------------------------------------------------------------------------------------------------------------------------------------------------------------------------------|
| Journal:                        | <i>BMJ Open</i>                                                                                                                                                                                                                                                                                                                                                                                                                                                                                                                                                                                                                                                                                                                                                                                                                                                           |
| Manuscript ID                   | bmjopen-2020-040999.R1                                                                                                                                                                                                                                                                                                                                                                                                                                                                                                                                                                                                                                                                                                                                                                                                                                                    |
| Article Type:                   | Protocol                                                                                                                                                                                                                                                                                                                                                                                                                                                                                                                                                                                                                                                                                                                                                                                                                                                                  |
| Date Submitted by the Author:   | 22-Jun-2020                                                                                                                                                                                                                                                                                                                                                                                                                                                                                                                                                                                                                                                                                                                                                                                                                                                               |
| Complete List of Authors:       | Lakin, Joshua R; Brigham and Women's Hospital and Harvard Chan School of Public Health,<br>Brannen, Elise; Dana Farber Cancer Institute, Psychosocial Oncology and Palliative Care<br>Tulskey, James A ; Dana Farber Cancer Institute,<br>Paasche-Orlow, Michael; Boston University School of Medicine/Boston Medical Center, General Internal Medicine<br>Lindvall, Charlotta ; Dana Farber Cancer Institute, Psychosocial Oncology and Palliative Care<br>Chang, Yuchiao; Massachusetts General Hospital, Department of Medicine; Harvard Medical School<br>Gundersen, Daniel A.; Dana Farber Cancer Institute, Survey and Data Management Core<br>El-Jawahri, Areej; Harvard Medical School; Massachusetts General Hospital, Hematology-Oncology<br>ACP Peace Investigators, The<br>Volandes, Angelo; Massachusetts General Hospital, Medicine; Harvard Medical School |
| <b>Primary Subject Heading</b>: | Oncology                                                                                                                                                                                                                                                                                                                                                                                                                                                                                                                                                                                                                                                                                                                                                                                                                                                                  |
| Secondary Subject Heading:      | Palliative care, Geriatric medicine, Communication                                                                                                                                                                                                                                                                                                                                                                                                                                                                                                                                                                                                                                                                                                                                                                                                                        |
| Keywords:                       | PALLIATIVE CARE, ONCOLOGY, MEDICAL EDUCATION & TRAINING, Information management < BIOTECHNOLOGY & BIOINFORMATICS, Adult palliative care < PALLIATIVE CARE                                                                                                                                                                                                                                                                                                                                                                                                                                                                                                                                                                                                                                                                                                                 |
|                                 |                                                                                                                                                                                                                                                                                                                                                                                                                                                                                                                                                                                                                                                                                                                                                                                                                                                                           |

SCHOLARONE™  
 Manuscripts



I, the Submitting Author has the right to grant and does grant on behalf of all authors of the Work (as defined in the below author licence), an exclusive licence and/or a non-exclusive licence for contributions from authors who are: i) UK Crown employees; ii) where BMJ has agreed a CC-BY licence shall apply, and/or iii) in accordance with the terms applicable for US Federal Government officers or employees acting as part of their official duties; on a worldwide, perpetual, irrevocable, royalty-free basis to BMJ Publishing Group Ltd ("BMJ") its licensees and where the relevant Journal is co-owned by BMJ to the co-owners of the Journal, to publish the Work in this journal and any other BMJ products and to exploit all rights, as set out in our [licence](#).

The Submitting Author accepts and understands that any supply made under these terms is made by BMJ to the Submitting Author unless you are acting as an employee on behalf of your employer or a postgraduate student of an affiliated institution which is paying any applicable article publishing charge ("APC") for Open Access articles. Where the Submitting Author wishes to make the Work available on an Open Access basis (and intends to pay the relevant APC), the terms of reuse of such Open Access shall be governed by a Creative Commons licence – details of these licences and which [Creative Commons](#) licence will apply to this Work are set out in our licence referred to above.

Other than as permitted in any relevant BMJ Author's Self Archiving Policies, I confirm this Work has not been accepted for publication elsewhere, is not being considered for publication elsewhere and does not duplicate material already published. I confirm all authors consent to publication of this Work and authorise the granting of this licence.

Original Article

**Advance Care Planning: Promoting Effective and Aligned Communication in the Elderly  
(ACP-PEACE)**

**The study protocol for a pragmatic stepped-wedge trial of older patients with cancer**

**Running Title: Protocol for the ACP-PEACE pragmatic stepped-wedge trial**

Joshua R Lakin, MD<sup>1,2</sup>; Elise N Brannen, BS, BA<sup>1</sup>; James A Tulsy, MD<sup>1,2</sup>; Michael K Paasche-Orlow, MD<sup>3</sup>; Charlotta Lindvall, MD, PhD<sup>1,2</sup>; Yuchiao Chang<sup>2,4</sup>; Daniel A. Gundersen<sup>5</sup>; Areej El-Jawahri MD<sup>2,6</sup>; The ACP-PEACE Investigators; Angelo Volandes, MD<sup>2,4</sup>

**Author Affiliations:**

<sup>1</sup>Department of Psychosocial Oncology and Palliative Care, Dana-Farber Cancer Institute, Boston, MA, USA

<sup>2</sup>Harvard Medical School, Boston, MA, USA

<sup>3</sup>Boston University School of Medicine, Section of General Internal Medicine, Boston Medical Center, Boston, MA, USA

<sup>4</sup>Department of Medicine, Massachusetts General Hospital, Boston, MA, USA

<sup>5</sup>Survey and Data Management Core, Dana-Farber Cancer Institute, Boston, Massachusetts, USA

<sup>6</sup>Hematology-Oncology, Massachusetts General Hospital, Boston, MA, USA

**Corresponding Author:**

Joshua R. Lakin, MD, Dana-Farber Cancer Institute, 450 Brookline Ave, D-216A, Boston, MA, USA

Email: [jlakin@partners.org](mailto:jlakin@partners.org)

**Collaborators:** The ACP-PEACE Investigators: Julie Goldman, MSW, MS; Brian Sipin, BSc; Michael J Barry, MD; Kathryn I Pollak, PhD; Miji Sofela, MBChB; Danielle Kennedy, MPH; S. Yousuf Zafar, MD; Maria Torroella Carney, MD; Diana Martins-Welch, MD; Michael Qiu, MD, PhD; Jody-Ann McLeggon, MPH; Craig E Devoe, MD; Jon C. Tilburt, MD; Charles L Loprinzi, MD; Parvez A. Rahman, MHI; Jeremiah J. Stout, BA; Aretha Delight Davis, MD, JD; Lisa M. Quintiliani, PhD

**Word Count:** 4448

1  
2  
3 **Keywords (3-10):** Advance Care Planning, Palliative Care, Shared Decision Making, Cancer,  
4  
5 Video Aids, Clinician Education, Communication, End-of-Life Care  
6

7  
8 **IRB Protocol Version:** 10  
9

10 **Funding:** Research reported in this publication was supported within the National Institutes of  
11 Health (NIH) Health Care Systems Research Collaboratory by cooperative agreement  
12 UH3AG060626 from the National Institute on Aging. This work also received logistical and  
13 technical support from the NIH Collaboratory Coordinating Center through cooperative  
14 agreement U24AT009676. The content is solely the responsibility of the authors and does not  
15 necessarily represent the official views of the National Institutes of Health.  
16  
17  
18  
19

20 **Patient and Public Involvement Statement:** Patients or the public were not involved in the  
21 design, or conduct, or reporting, or dissemination plans of our research.  
22  
23  
24  
25  
26  
27  
28  
29  
30  
31  
32  
33  
34  
35  
36  
37  
38  
39  
40  
41  
42  
43  
44  
45  
46  
47  
48  
49  
50  
51  
52  
53  
54  
55  
56  
57  
58  
59  
60



## ABSTRACT

**Introduction:** Advance Care Planning (ACP) is associated with improved health outcomes for patients with cancer and its absence is associated with unfavorable outcomes for patients and their caregivers. However, older adults do not complete ACP at expected rates due to patient and clinician barriers. We present the original design, methods, and rationale for a trial aimed at improving ACP for older patients with advanced cancer and the modified protocol in response to changes brought by the COVID-19 pandemic.

**Methods and Analysis:** The Advance Care Planning: Promoting Effective and Aligned Communication in the Elderly study is a pragmatic, stepped-wedge cluster randomized trial examining a Comprehensive ACP Program. The Program combines two complementary evidence-based interventions: clinician communication skills training (VitalTalk) and patient video decision aids (ACP Decisions). We will implement the Program at 36 oncology clinics across three unique U.S. health systems. Our primary outcome is the proportion of eligible patients with ACP documentation completed in the Electronic Health Record. Our secondary outcomes include resuscitation preferences, palliative care consultations, death, hospice use, and final cancer-directed therapy. From a subset of our patient population, we will collect surveys and video-based declarations of goals and preferences. We estimate 11,000 patients from the three sites will be enrolled in the study.

**Ethics and Dissemination:** Regulatory and ethical aspects of this trial include Institutional Review Board (IRB) approval via single IRB of record mechanism at Dana-Farber Cancer Institute, Data Use Agreements among partners, and a Data Safety and Monitoring Board. We plan to present findings at national meetings and publish the results. Trial registered at ClinicalTrials.gov (NCT03609177).

## ARTICLE SUMMARY: STRENGTHS AND LIMITATIONS

- The strengths of this study lie in its pragmatic design, allowing for “real world” evidence for two interventions that have been previously tested in more controlled settings.
- The stepped wedge design is practical and considered the design of choice when it is logistically impractical to simultaneously roll out the intervention to half of the clusters.
- The biggest limitation we are currently facing has to do with the possible notable change in secular trends due to the Coronavirus Disease 2019 and the impact that has on Advance Care Planning. To address this issue, we have adjusted our analysis plan to account for these changes.
- We are limited by the quality of structured and present variables in the electronic health records of each site, especially for Advance Care Planning, however our use of Natural Language Processing helps to rectify for lack in accuracy.
- In addition to the above change in secular trends due to COVID, this trial design can be affected by ongoing innovation in cancer care delivery, such as the continuing growth of immunotherapy changing prognosis for some of these advanced cancers in significant ways, thus affecting our results.

## INTRODUCTION

More than half of newly diagnosed malignancies occur in patients over the age of 65<sup>1</sup> and that same population accounts for over two-thirds of all adult U.S. cancer deaths.<sup>2</sup> In addition to high mortality, older adults with cancer suffer disproportionately from receiving medical interventions that do not reflect their values and preferences.<sup>3-5</sup> Advance care planning (ACP) seeks to align medical care with patients' values and preferences.<sup>6,7</sup> ACP is consistently associated with better outcomes<sup>8,9</sup> while a lack of ACP is associated with greater use of unwanted medical interventions, more terminal hospitalizations, lower hospice use, higher healthcare costs, and worse bereavement outcomes.<sup>3,10-14</sup> Despite evidence supporting ACP, participation rates remain low among older adults with serious illness, such as cancer.<sup>15</sup>

Effective ACP requires that patients experience accurate and comprehensible communication early in their illness,<sup>14,16-18</sup> a collaborative effort requiring education for both patients and clinicians. Unfortunately, studies suggest that traditional written ACP can be ineffective in sufficiently informing patients and often occurs late in the disease process,<sup>19-24</sup> with the risk that patients' understanding is clouded by pain, medication, or psychological distress.<sup>10,20</sup> <sup>25</sup> The heightened emotional state associated with hearing bad news late in a disease course interferes with patients' cognitive processing, and this reaction may be exacerbated by clinician inattention to affect.<sup>21,26-29</sup> Patients assign considerable importance to their physicians' statements regarding ACP and the quality of communication<sup>30</sup> and while 90% of patients say they want to talk to their doctors about their stress and concerns,<sup>31,32</sup> physicians generally, and oncologists specifically, often do not communicate effectively regarding ACP and end of life.<sup>30,32-38</sup> Therefore, an effective intervention should both prepare patients for shared decision making and improve clinicians' communication skills.

1  
2  
3 We have developed a Comprehensive ACP Program to drive improved communication  
4 and ACP for an aging U.S. cancer population using a combination of empirically proven patient  
5 video decision aids and clinician communication skills training. This program integrates video  
6 decision aids for patients (ACP Decisions) and a clinician communication training program  
7 (VitalTalk) into 12 disease-based oncology clinics each across three health systems with the aim  
8 of improving conversations and documentation of ACP. By providing both patients and  
9 clinicians with the necessary tools and training, we create an inclusive approach to optimize ACP  
10 before the toughest choices arise for patients.  
11  
12  
13  
14  
15  
16  
17  
18  
19  
20

21 Most trials targeting older patients with serious illness evaluate interventions under ideal  
22 conditions and involve few facilities.<sup>39-42</sup> Thus, we need research for this population using  
23 pragmatic trials.<sup>43</sup> We sought to test this intervention in a manner that allows for improvements  
24 in processes as we learn them.<sup>44</sup> Advance Care Planning: Promoting Effective and Aligned  
25 Communication in the Elderly (ACP-PEACE) is a pragmatic stepped-wedge cluster randomized  
26 trial (SW-CRT) that conducts a real-world test of the Comprehensive ACP Program in older  
27 patients with cancer. In this paper, we present the design, methodology, and rationale for the  
28 ACP-PEACE trial and discuss our adjustments for the novel coronavirus COVID 19 pandemic.  
29  
30  
31  
32  
33  
34  
35  
36  
37  
38  
39  
40  
41

## 42 **METHODS**

### 43 **Overview**

44 We are studying the combination of clinician training and patient videos via a pragmatic  
45 SW-CRT and analyzing electronic health records (EHRs) for ACP outcomes for patients aged 65  
46 and older. Utilizing small sub-samples of patients, we will also assess patient-centered outcomes  
47 using surveys and video declarations in which patients discuss their values and preferences in  
48  
49  
50  
51  
52  
53  
54  
55  
56  
57  
58  
59  
60

1  
2  
3 their own words on video (Figure 1). We used the SPIRIT reporting guidelines for this  
4  
5 manuscript.<sup>45</sup>  
6  
7  
8  
9

## 10 **Study Timeline**

11  
12 The ACP-PEACE study has two phases, a characteristic of the funding mechanism. The  
13  
14 UG3 phase (year 1) of the study focused on developing and refining the intervention and data  
15  
16 acquisition. In this phase we established our organizational structure, developed the processes  
17  
18 and infrastructure needed to conduct the trial, and pilot-tested the study intervention in three  
19  
20 clinics, one from each participating health system. During the UH3 phase (years 2-5), we  
21  
22 planned to introduce the intervention to the 36 remaining oncology clinics in six-month waves;  
23  
24 two clinics per system for a total of six clinics every six months (Figure 2).  
25  
26  
27  
28  
29  
30

## 31 **Sites and randomization**

32  
33 We will draw participants from disease-based oncology clinics from three unique systems  
34  
35 - Duke Health (North Carolina), Mayo Clinic (Minnesota), and Northwell Health (New York).  
36  
37 These sites are geographically, socioeconomically, and culturally distinct. Each participating  
38  
39 clinic has more than one practicing oncologist and to be eligible for randomization, at least 30%  
40  
41 of the patient population must be age 65 or older.  
42  
43  
44

45 For the UH3 phase, we have identified a total of 36 oncology clinics (12 per site) as  
46  
47 candidate clinics based on recent data from each system. The pilot clinics that participated in the  
48  
49 UG3 phase tested the intervention process and will not be included in the final analysis. In the  
50  
51 UH3 phase, we will utilize stepped-wedge cluster randomization with the clinic as the unit of  
52  
53 randomization. With the clinic as the unit of randomization, we avoid the contamination that can  
54  
55  
56  
57  
58  
59  
60

1  
2  
3 occur when randomizing individuals within each clinic. The sequence of randomization was  
4 generated prior to initiation of the trial via random number generator. Every six months after the  
5 baseline, two clinics from each system will be randomized to the intervention. (Figure 3a)  
6  
7  
8  
9

10 During the original Step 2, COVID-19 spread throughout the country interrupting the  
11 stepped-wedge design in two key respects: 1. The team was unable to conduct the in-person  
12 trainings for the Step 2 intervention clinics; and, 2. ACP activities are likely to increase during  
13 this period due to a response to the pandemic, irrespective of the study. Upon the  
14 recommendation of the NIH Collaboratory Statistics Core, we modified the original design to  
15 “restart” the trial for the remaining 30 clinics using the original Step 2 as the new baseline. The  
16 training of the remaining 30 control clinics will be over four steps to keep the trial completion on  
17 the same overall timeline (Figure 3b).  
18  
19  
20  
21  
22  
23  
24  
25  
26  
27  
28  
29  
30

### 31 **Population**

32  
33 We will evaluate the outcomes for patients aged 65 or older with advanced cancer across  
34 all 36 clinics. As the intervention will be implemented clinic-wide, rather than targeted to  
35 specific study patients, all intervention clinic patients can receive the intervention. We will  
36 analyze data for patients with advanced cancer aged 65 or older; patients’ data will be counted  
37 towards control or intervention based on the allocation of each clinic at the end of each period of  
38 the stepped-wedge design. Therefore, a given patient could contribute data during more than one  
39 period and could contribute data to both control and intervention periods.  
40  
41  
42  
43  
44  
45  
46  
47  
48

49 During the UH3 years, research assistants at each site will conduct in-person surveys with  
50 450 randomly selected patients (150 per site) for our secondary exploratory patient-centered  
51 outcomes. Patients selected for surveys will be distributed evenly among clinics within each  
52  
53  
54  
55  
56  
57  
58  
59  
60

1  
2  
3 system and will include an equal number of surveys of patients from clinics in the control and  
4  
5 intervention phases. Patients will be surveyed only once as patients surveyed in the control phase  
6  
7 will be excluded from completing the later intervention survey. Additionally, from among this  
8  
9 group of 450 surveyed patients, a sub-group of 240 will be randomly selected and asked to  
10  
11 conduct a video declaration activity. All patients selected for surveys or videos will be excluded  
12  
13 from the primary study population to avoid bias rendered from additional contact with the study  
14  
15 team.  
16  
17  
18  
19  
20

### 21 **Intervention design, implementation, and adherence monitoring**

22  
23  
24 The Comprehensive ACP intervention combines VitalTalk and ACP Decisions, two  
25  
26 evidence-based interventions previously used separately, to create an innovative dual approach to  
27  
28 improving ACP. These interventions are complementary, as one targets improvement of  
29  
30 clinicians' skills and the other prepares patients for shared decision making. VitalTalk is the  
31  
32 most widely disseminated teaching method for effective communication skills training based on  
33  
34 practice and feedback on one's own communication skills. Supported by numerous previous  
35  
36 studies,<sup>46-52</sup> VitalTalk leverages didactics, demonstration, and small group sessions using role  
37  
38 play with trained actors portraying patients through which clinicians learn effective delivery of  
39  
40 serious news, prognosis discussion, early and late goals-of-care conversations. For this study, the  
41  
42 VitalTalk course will be a half-day session that teaches a framework for late goals-of-care  
43  
44 discussions, including skills around delivery of serious news, responding to emotion, assessing  
45  
46 prognostic awareness, identifying what is most important to patients, and making  
47  
48 recommendations.  
49  
50  
51  
52  
53  
54  
55  
56  
57  
58  
59  
60

1  
2  
3 The ACP Decisions program uses short video decision aids to address the most common  
4 issues facing older patients with serious illness. Videos in over 25 languages can be prescribed to  
5 patients and caregivers and are easily accessed in a mobile app or through a web-based platform.  
6  
7 The ACP Decisions videos have been shown to increase knowledge, decision certainty, and the  
8 stability of preferences over time, and to better inform the way that patients choose health care  
9 interventions towards the end of life.<sup>53-72</sup> The video collection includes certified video decision  
10 aids,<sup>73</sup> regarding ACP, advance directives, health care agents, goals of care, cardiopulmonary  
11 resuscitation, and hospice, that have been studied in a statewide implementation showing greater  
12 patient-aligned medical care.<sup>72</sup>

13  
14 We will provide in-person training every six months at each new clinic added to the  
15 intervention period of the trial. The Comprehensive ACP training program utilizes the VitalTalk  
16 methodology and infrastructure and the ACP Decisions Program tools to instruct clinicians and  
17 staff on how to (1) more effectively communicate with patients with cancer, (2) have ACP  
18 conversations with patients, (3) introduce the videos to patients and families, (4) use the videos  
19 as an adjunct to ACP counseling by clinicians, (5) select the appropriate video(s) according to  
20 patient needs, and (6) use the application or electronic platform for viewing videos. The  
21 combined program will involve a half-day face-to-face joint VitalTalk and ACP Decisions  
22 training. Any staff member affiliated with the selected facilities will be eligible to participate in  
23 training. As staff turnover among the sites is expected, training will be made available on an  
24 ongoing basis throughout the trial.

25  
26 Immediately following the initial training at each site, we will deploy the remainder of  
27 the intervention infrastructure. The ACP Decisions videos will be programmed into desktop  
28 devices, tablets, and password-protected electronic platforms of each health system's intranet.  
29  
30  
31  
32  
33  
34  
35  
36  
37  
38  
39  
40  
41  
42  
43  
44  
45  
46  
47  
48  
49  
50  
51  
52  
53  
54  
55  
56  
57  
58  
59  
60



1  
2  
3 When clinics initiate the intervention, they will implement the videos with all patients with  
4 flexibility as to which providers (physician, nurse, social worker) introduce the videos and  
5 exactly which videos are utilized to meet their patients' clinical needs. Additionally, the in-  
6 person clinician training will be supplemented with emails, pocket cards, offers of coaching, and  
7 online educational videos. The study team will facilitate dissemination of implementation  
8 successes and challenges via a learning network by conducting one-hour webinars at each of the  
9 practices randomized to the intervention every other month to discuss quality improvement  
10 activities relating to the study. The intensity of the VitalTalk training implementation will be  
11 assessed as the proportion of eligible staff trained, including new staff joining the practice over  
12 the implementation period. The intensity of implementation of the ACP Decisions videos will be  
13 assessed as the ratio of the number of videos viewed using the site-specific access codes captured  
14 at the ACP Decisions website to the number of eligible patients at each site for each six-month  
15 intervention period. Fidelity to the video component of the intervention will be monitored by  
16 tracking of video use (which videos are used at each clinic, playthrough rate, and frequency).  
17 Feedback on video viewing will be shared with each site at the end of each six-month  
18 implementation phase. Last, we aim to evaluate the impact of the study with a novel video  
19 declaration process, allowing patients to state their values and preferences in their own terms,  
20 which is described in detail in the Appendix.<sup>59</sup>

### 21 22 23 24 25 26 27 28 29 30 31 32 33 34 35 36 37 38 39 40 41 42 43 44 45 46 47 **Control condition**

48  
49 Clinics in the control phase will use whatever ACP procedures already exist in place at  
50 their respective system. Although current ACP-improvement initiatives may be present and vary  
51  
52  
53  
54  
55  
56  
57  
58  
59  
60

1  
2  
3 from clinic to clinic, this heterogeneity reflects the current dynamic state of “usual” care and is  
4  
5 therefore appropriate in this pragmatic trial.<sup>43</sup>  
6  
7

## 8 9 10 **Outcomes**

11  
12 The outcomes of the ACP-PEACE trial can be divided into three main categories:  
13  
14 patient-level, clinician-level, and system-level. Our primary outcome is the proportion of eligible  
15  
16 patients with ACP documentation completed in the EHR. Presence of completed ACP  
17  
18 documentation will be defined via one or both of the following two means: 1) Structured EHR  
19  
20 data: scanned forms including advance directives, living wills, or Physician’s Orders for Life  
21  
22 Sustaining Treatment (or state-specific equivalent) and code status orders indicating Do Not  
23  
24 Resuscitate Status (or similar site-specific codes for limitations on treatments) and 2) Natural  
25  
26 Language Processing (NLP) extraction (described below in detail): clinical documentation that  
27  
28 will include goals-of-care discussion, ACP, hospice discussion, discussion of palliative care, or  
29  
30 limitations on code status. From the EHR or the local tumor registry, we are also determining  
31  
32 demographic covariates and baseline data. Secondary outcomes include resuscitation  
33  
34 preferences, palliative care consultations, death, hospice use/utilization at the end of life, and  
35  
36 final cancer-directed therapy.  
37  
38  
39  
40  
41

42 We are deriving patient-centered outcomes from the patient survey and video  
43  
44 declarations. The surveys measure our patient-centered secondary outcomes such as patient  
45  
46 confidence that their future medical care will match their values, satisfaction with their  
47  
48 clinicians’ communication,<sup>74 75</sup> satisfaction with their medical decision,<sup>76</sup> and regret about their  
49  
50 medical decision (Appendix).<sup>77 78</sup> Finally, for each of the 450 surveyed patients who die during  
51  
52 the study period, we will extract data, via a chart abstraction tool, regarding ACP preferences and  
53  
54  
55  
56  
57  
58  
59  
60

care received in the final three months of life to explore whether patients receive goal-concordant care.

We are also collecting a small set of clinician data points. Participating clinicians provide information on demographics, clinical experience, prior communication training, and socioemotional orientation.<sup>52</sup> Table 1 lists each data element, with its purpose, proposed source, and the target population from whom we need the data for successful completion of the study. System-level data measurement will include measurement of the training and video use as described above as well as exploratory analysis of coaching calls and implementation activities.

**Table 1.** Data Elements and Outcomes

| Data Element                                   | Purpose                | Source                     | Population                                           |
|------------------------------------------------|------------------------|----------------------------|------------------------------------------------------|
| <b>A. Patient-Level</b>                        |                        |                            |                                                      |
| 1. Demographics                                | Covariate (moderator)  | EHR, Tumor Registry        | Entire study population                              |
| 2. ACP documents                               | 1 <sup>o</sup> outcome | EHR                        | Entire study population                              |
| 3. Resuscitation Preference                    | 2 <sup>o</sup> outcome | EHR                        | Entire study population                              |
| 4. Palliative care consults                    | 2 <sup>o</sup> outcome | EHR                        | Entire study population                              |
| 5. Hospice use/ Utilization at the end of life | 2 <sup>o</sup> outcome | EHR, Tumor Registry, Other | Entire study population – for those patients who die |
| 6. Final Cancer-Directed Therapy               | 2 <sup>o</sup> outcome | EHR, Tumor Registry        | Entire study population – for those patients who die |
| 7. Death                                       | Covariate              | EHR, Tumor Registry, Other | Entire study population                              |
| 8. Patient confidence                          | 2 <sup>o</sup> outcome | Survey                     | Subgroup of 450 patients                             |
| 9. Communication satisfaction                  | 2 <sup>o</sup> outcome | Survey                     | Subgroup of 450 patients                             |
| 10. Decisional satisfaction                    | 2 <sup>o</sup> outcome | Survey                     | Subgroup of 450 patients                             |
| 11. Decisional regret                          | 2 <sup>o</sup> outcome | Survey                     | Subgroup of 450 patients                             |
| 12. Family Communication                       | Exploratory            | Survey                     | Subgroup of 450 patients                             |
| 13. Goal-concordant care                       | Exploratory            | EHR                        | Subgroup of 450 patients                             |
| 14. Video declaration                          | Exploratory            | Video App                  | Subgroup of 240 patients                             |
| <b>B. Clinician-Level</b>                      |                        |                            |                                                      |
| 1. Demographic                                 | Covariate (moderator)  | Survey                     | All clinicians who participate                       |
| 2. Experience                                  | Covariate              | Survey                     | All clinicians who participate                       |
| 3. Communication training                      | Covariate              | Survey                     | All clinicians who participate                       |
| 4. Socioemotional Orientation                  | Covariate              | Survey                     | All clinicians who participate                       |
| <b>C. System-Level</b>                         |                        |                            |                                                      |
| 1. Practice variation                          | Exploratory            | Audio Record               |                                                      |
| 2. Leadership/Teamwork                         | Exploratory            | Audio Record               |                                                      |
| 3. Intervention/Video use                      | Monitoring fidelity    | Video App                  | Entire study population                              |

## Data sources, data elements, and linkage

Baseline (i.e., pre-intervention) data for all randomized clinics will include a six-month period prior to date of intervention delivery. Patients will be identified as having advanced cancer from each site's tumor registry and/or from clinical ICD codes, which have been studied in some cancers and have demonstrated strong specificities.<sup>79</sup> While these methods have lower sensitivity, they capture enough patients with advanced cancer with high specificity for outcome assessment without systematic bias towards intervention or control periods. Demographic information and baseline characteristics relevant to general oncology will be collected from the EHR. Our primary and secondary outcomes will be abstracted from the local EHRs and tumor registries as detailed below in outcomes.

We will also use NLP, a form of computer-assisted abstraction, to detect our primary and secondary outcomes. Our NLP software, ClinicalRegex, identifies predefined keywords or phrases within clinical notes, considering varieties in language and punctuation.<sup>80-82</sup> ClinicalRegex also allows for rapid semi-automated review that ensures that keywords have not been taken out of context. For each NLP process (i.e., goals-of-care discussion), we have built a keyword library that identifies relevant documentation within clinical notes. Each keyword library was refined and validated by manual review of clinical notes in local EHRs. With NLP, we will collect additional data on ACP documentation, goals-of-care discussions, limitation of life-sustaining treatment, palliative care consultation, and hospice assessment. Exploratory patient-centered outcomes and clinician outcomes will be derived from surveys collected through REDCap.<sup>83 84</sup>

Data Use Agreements between all systems are on file and each site maintains and adheres to the process and procedures for the protection of human subjects and protected health

1  
2  
3 information (PHI) for their covered entities. Only the minimum amount of necessary PHI will be  
4  
5 collected from participants. HIPAA compliant and password protected servers will be used to  
6  
7 store all collected data. Individual password protected files will separate participant identifiers  
8  
9 and a third password protected linking file will be maintained. This linking file has restricted  
10  
11 access and utilizes a logging feature that identifies each user and instance of use. All data will be  
12  
13 transmitted via secure methods approved by the respective institutions to the Dana-Farber Cancer  
14  
15 Institute (DFCI) for data management and to Boston Medical Center for qualitative analysis and  
16  
17 trial investigators will have access to the final data set and it will be made available upon  
18  
19 reasonable request. The EHR data will undergo a review-adjudication process whereby DFCI  
20  
21 data staff and key, unblinded investigators, review the raw data for each variable to identify out  
22  
23 of range or unexpected values, a summary is sent to each site and conference calls are conducted  
24  
25 with relevant investigators and programmers to adjudicate any issues. We will also validate a  
26  
27 randomly selected subset of data, verifying key demographic characteristics and patient selection  
28  
29 criteria against medical records. The EHR data is then uploaded to a REDCap database.  
30  
31  
32  
33  
34  
35  
36  
37

### 38 **Masking**

39  
40 Blinding for this trial occurs at multiple levels. Research Co-Investigators at each site  
41  
42 will be aware of the randomization order as well as which clinics receive the intervention and  
43  
44 when. The investigators leading the trainings will likewise be aware of which clinics receive the  
45  
46 intervention. Similarly, due to their roles in working with the data and generating video  
47  
48 adherence reports for the intervention clinics, certain members of the implementation and data  
49  
50 management teams will be unblinded to clinic assignments and outcomes. All other staff will  
51  
52 remain blinded to randomization scheme and outcomes.  
53  
54  
55  
56  
57  
58  
59  
60

## Statistical Analysis

Our primary analytical approach uses an intention to treat analysis, with no special allowance for noncompliance or nonadherence. With the stepped-wedge design, the outcomes during the intervention (exposed) periods will be compared to outcomes during the control (unexposed) periods. We will conduct two analyses based on the observations included in the analysis: (1) Open cohort with repeated measures design: individuals may leave and others may join during the study and the same individuals are allowed to appear in multiple periods, (2) Repeated cross-sectional design: subjects will only be included in the period when they first enter the study. Characteristics of the individuals and clusters will be summarized by exposure status.<sup>85</sup> We will use generalized linear mixed models to compare outcomes between intervention and control periods. The basic model is depicted in this equation:

$$g(Y_{ijk}) = \mu + \alpha_i + \beta_j + \gamma_k + X_{ij}\theta$$

where  $Y_{ijk}$  denotes the response from individual  $k$  at time  $j$  from cluster  $i$ . To account for clustering within each clinic, the model includes a random effect  $\alpha_i$  for cluster  $i$ . Under the stepped wedge design, calendar time is associated with the exposure to the intervention. We will include a fixed effect  $\beta_j$  to adjust for potential confounding factors from calendar time. In the case that time effect might not be the same for all clusters, we will change the term from a fixed effect  $\beta_j$  to a random effect  $\beta_{ij}$ . To account for repeated measures from the same subject from the first analysis, we will include a random subject effect  $\gamma_k$ . The term  $X_{ij}$  represents the treatment indicator in cluster  $i$  at time  $j$  with  $\theta$  representing the overall treatment effect. If there is evidence of treatment effect heterogeneity, we will either change the fixed effect  $\theta$  to a random effect  $\theta_i$  or change the fixed effect  $\theta$  to  $\theta_{(s)}$  which allows different treatment effects for different strata. We will also explore heterogeneity of intervention effect for different subgroups by adding an

1  
2  
3 interaction term between treatment status and subgroup to the models. These groups include site,  
4 sex as a biological variable, race/ethnicity (white vs. non-white), and different types of cancer  
5 diagnoses.  
6  
7  
8  
9

10 If necessary, we will include additional terms  $\delta_1 Z_{ijk}$  and  $\delta_2 W_{ij}$  to the model, where  $Z$  and  
11  $W$  represent vectors of patient and cluster characteristics. The index  $j$  in the  $Z$  matrices allows us  
12 to include the time-varying covariates, which correspond to any patient characteristics that could  
13 change over time. We will use a logit link ( $g$ ) for the binary outcomes which include our primary  
14 outcome of ACP documentation and our secondary outcomes of resuscitation preference and  
15 hospice use. Other outcomes such as number of palliative care consults and utilizations are  
16 considered as Poisson variables and modeled with a log link.  
17  
18  
19  
20  
21  
22  
23  
24  
25

26 In adjustment for the COVID 19 pandemic, the analysis plan will remain the same for the  
27 data collected from the 30 clinics randomized to intervention after the original Step 2 (Figure  
28 3b). The data collected from the 6 clinics that received intervention during Step 1 will allow us to  
29 examine the ACP Program intervention effect prior to COVID-19 by comparing the ACP rates  
30 prior to the intervention (original baseline) and after the intervention (original Step 1).  
31 Additionally, ACP rates from original baseline, Step 1 and Step 2 from the 30 clinics randomized  
32 to intervention after the original Step 2 will be used to estimate the “COVID-19 effect” on ACP.  
33  
34  
35  
36  
37  
38  
39  
40  
41  
42

43 We also have patient-centered secondary outcomes from survey results for analysis.  
44 Since patients will be surveyed in the step immediately before and after the intervention is  
45 initiated within each clinic, the number of intervention and control patients will be approximately  
46 equal at each time point. We will use linear mixed models that treat time (i.e., before or after  
47 intervention) as a fixed effect and clinic as a random effect to account for clustering of patients  
48 within clinics.  
49  
50  
51  
52  
53  
54  
55  
56  
57  
58  
59  
60

1  
2  
3 Finally, we will examine care delivery alignment with expressed goals from a subset of  
4 deceased patients of those 450 surveyed. Using a chart abstraction tool, two blinded expert  
5 investigators will judge whether patients received care concordant with their documented wishes.  
6  
7 Coders will make determinations and discuss disagreements; final judgments will be determined  
8 by consensus. For qualitative coding evaluation, we will summarize the extent of agreement  
9  
10 using kappa statistics and will compare results between those who died before and after receiving  
11 interventions.  
12  
13  
14  
15  
16  
17  
18  
19  
20  
21

### 22 **Statistical power and sample size requirements**

23  
24 We used the Hooper et al.<sup>86 87</sup> approach to conduct the power analysis. We originally  
25 estimated close to 5,000 patients from 36 oncology practices are eligible for the study at each  
26 time point and approximately 20% are new patients at each step. With 7 time points (baseline  
27 plus 6 steps), we anticipated a total of 11,000 unique patients will be included in the study. With  
28 the modified design, we estimate 4,160 patients from 30 oncology practices are eligible for the  
29 study at each time point and a total of 7,500 unique patients will be included in the stepped-  
30 wedge design analysis. With each clinic contributing an average of 139 patients at each step from  
31 the cohort design, the design effect due to clustering is 7.9 assuming an intra-cluster correlation  
32 of 0.05, and the design effect due to repeated assessment is 0.12 assuming the cluster  
33 autocorrelation coefficient is 0.7 and the individual autocorrelation coefficient is 0.9. These  
34 estimates correspond to an effective sample size (i.e., sample size required for individual  
35 randomization) of 4,405. For the repeated cross-sectional design, each clinic will contribute an  
36 average of 23 new patients at each step, and the effective sample size is 1,628 with the same  
37 assumptions on intra-cluster correlation and cluster autocorrelation. Preliminary estimates  
38  
39  
40  
41  
42  
43  
44  
45  
46  
47  
48  
49  
50  
51  
52  
53  
54  
55  
56  
57  
58  
59  
60



1  
2  
3 indicate the rate for ACP documentation (the primary outcome) ranges from 15% to 30% for the  
4 control periods, which requires an effective sample size of 500 to 954 for detecting a 10%  
5  
6 absolute increase in our primary outcome with a two-sided significance level of 0.05. Therefore,  
7  
8 the study will have more than 90% power for either analysis using the open cohort with repeated  
9  
10 measures design or the repeated cross-sectional design.  
11  
12  
13

14  
15 For the patient-centered survey outcomes, 225 patients will be surveyed during control  
16 periods and 225 will be surveyed during intervention periods. Assuming an ICC of 0.05 and an  
17 average cluster size of 12.5, the effective sample size is approximately 286. A sample of this size  
18  
19 allows for 90% power to detect a small to moderate effect size (Cohen's *d*) of 0.39 and 99%  
20  
21 power to detect a moderate effect size of 0.5 for outcomes such as patient confidence, decisional  
22  
23 satisfaction and regret.  
24  
25  
26  
27  
28  
29

## 30 31 **ETHICS AND DISSEMINATION**

### 32 33 **Regulatory considerations**

34  
35 Regulatory aspects of this trial include Institutional Review Board (IRB) approval, Data  
36 Use Agreements among partners, and an independent Data Safety and Monitoring Board. This  
37  
38 study was approved via a single IRB of record mechanism as a multi-center trial with the DFCI  
39  
40 as the lead site and registered on ClinicalTrials.gov (NCT03609177). Duke Health, Mayo Clinic,  
41  
42 and Northwell Health are participatory sites and Boston Medical Center and Massachusetts  
43  
44 General Hospital are non-participatory sites. Each site's own regulatory board established  
45  
46 official "reliance agreements" to use the DFCI's Office of Human Research Subjects (OHRS) as  
47  
48 their main regulatory agent. The three participating sites have formally designated via SMART  
49  
50 IRB that the IRB of record is the DFCI IRB and agree to follow the rules and regulations set  
51  
52  
53  
54  
55  
56  
57  
58  
59  
60

1  
2  
3 forth by the DFCI OHRS. All relevant parties are notified by email of any protocol  
4  
5 modifications. This study presents minimal risk to participants. Investigators will monitor and  
6  
7 report any unforeseen adverse events to the IRB. We have proactively requested an audit to be  
8  
9 conducted by DFCI's OHRS before the trial end. Committees consisting of the various  
10  
11 investigators oversee overall project direction and administration, intervention implementation,  
12  
13 data quality and monitoring, stakeholder engagement, and regulatory and ethical considerations.  
14  
15 Data Use Agreements between all systems are on file and each site maintains and adheres to the  
16  
17 process and procedures for the protection of human subjects and PHI for their covered entities.  
18  
19 Patients will be notified of the study and their participation via broadcast notifications in the  
20  
21 form of posters in each of the clinics and will have the option to opt out. A waiver of consent  
22  
23 was approved for the EHR review of the primary study subjects who are not contacted by study  
24  
25 staff unless a specific research declination is on file at that site. Waivers of consent were also  
26  
27 approved for engaging participating clinicians and surveyed patients not completing the video  
28  
29 declaration as their participation is confidential and voluntary giving implied consent and there is  
30  
31 minimal risk with the study. Those surveyed patients who also elect to complete the video  
32  
33 declaration first need to sign an approved written consent form obtained by RAs at each site.  
34  
35  
36  
37  
38  
39  
40  
41

## 42 **Relevance and dissemination**

43  
44 The ACP-PEACE trial will be the first to study combining two evidence-based  
45  
46 interventions in a pragmatic setting. The work combines clinician training in responding to  
47  
48 emotion and handling difficult conversations with decision video aids for patients. The strengths  
49  
50 of the study include the complementary nature of these approaches: targeting both clinicians and  
51  
52 patients in a novel way. Additionally, the pragmatic nature of the trial allows us to collect  
53  
54  
55  
56  
57  
58  
59  
60

1  
2  
3 evidence of the effect of these interventions in a “real-world” setting and provides rich  
4  
5 information on the implementation of ACP interventions. This study has the potential to add to a  
6  
7 growing literature informing large systematic ways of improving ACP for older adults with  
8  
9 cancer. We plan to publish the primary outcome related to ACP documentation and our  
10  
11 secondary outcomes in a single paper. We will also perform further analyses of our NLP  
12  
13 methods, exploratory outcomes, chart review, implementation outcomes, and video declarations  
14  
15 and present these in publication and at national meetings.  
16  
17  
18  
19  
20  
21  
22  
23  
24  
25  
26  
27  
28  
29  
30  
31  
32  
33  
34  
35  
36  
37  
38  
39  
40  
41  
42  
43  
44  
45  
46  
47  
48  
49  
50  
51  
52  
53  
54  
55  
56  
57  
58  
59  
60

1  
2  
3 **Acknowledgements:** We would like to thank the participating oncology teams at each of our  
4  
5 three sites.  
6  
7

8 **Conflict of Interest Disclosures:** Dr. Lakin receives funding from the Cambia Health  
9  
10 Foundation as part of the Sojourns Scholars Leadership Program. Dr. Barry receives grant  
11  
12 support through Massachusetts General Hospital from Healthwise, a nonprofit patient education  
13  
14 and decision support organization. Dr. Davis is the CEO of ACP Decisions, a non-profit private  
15  
16 foundation. Dr. Tulsky is a Founding Director of VitalTalk, a non-profit organization focused on  
17  
18 clinician communication skills training, from which he receives no compensation. Dr. Volandes  
19  
20 has a financial interest in ACP Decisions Nous, a non-profit organization developing ACP video  
21  
22 decision support tools. His interests were reviewed and are managed by Massachusetts General  
23  
24 Hospital and Partners HealthCare in accordance with their conflict of interest policies.  
25  
26  
27  
28  
29

### 30 **Author Contributions**

31  
32 Study concept and design: Angelo Volandes, James Tulsky  
33

34 Acquisition of data: Joshua Lakin, Elise Brannen, Charlotta Lindvall, Daniel Gundersen, The  
35  
36 ACP-Peace Investigators  
37

38  
39 Analysis and interpretation of data: Joshua Lakin, Charlotta Lindvall, Daniel Gundersen,  
40  
41 Yuchiao Chang, James Tulsky, Michael Paasche-Orlow, Areej El-Jawahri, Angelo Volandes  
42

43 Drafting of the manuscript: Joshua Lakin, Elise Brannen, James Tulsky, Michael Paasche-Orlow,  
44  
45 Charlotta Lindvall, Yuchiao Chang, Daniel Gundersen, Areej El-Jawahri, The ACP-PEACE  
46  
47 Investigators, Angelo Volandes  
48  
49

50 Critical revision of the manuscript for important intellectual content: Joshua Lakin, Elise  
51  
52 Brannen, Angelo Volandes  
53

54  
55 Statistical analysis: Yuchiao Chang  
56  
57  
58  
59  
60

1  
2  
3 Obtained funding: Angelo Volandes, James Tulsy  
4

5 Administrative, technical, or material support: Elise Brannen, The ACP-PEACE Investigators  
6

7  
8 Study supervision: Angelo Volandes, James Tulsy  
9  
10  
11  
12  
13  
14  
15  
16  
17  
18  
19  
20  
21  
22  
23  
24  
25  
26  
27  
28  
29  
30  
31  
32  
33  
34  
35  
36  
37  
38  
39  
40  
41  
42  
43  
44  
45  
46  
47  
48  
49  
50  
51  
52  
53  
54  
55  
56  
57  
58  
59  
60

**REFERENCES**

1. Berger NA, Savvides P, Koroukian SM, et al. Cancer in the elderly. *Trans Am Clin Climatol Assoc* 2006;117:147-55; discussion 55-6. [published Online First: 2008/06/06]
2. Howlader NA, Krapcho M, Miller D, et al. SEER Cancer Statistics Review, 1975-2013, National Cancer Institute.
3. Ahronheim JC, Morrison RS, Baskin SA, et al. Treatment of the dying in the acute care hospital. Advanced dementia and metastatic cancer. *Arch Intern Med* 1996;156(18):2094-100. [published Online First: 1996/10/14]
4. Earle CC, Landrum MB, Souza JM, et al. Aggressiveness of cancer care near the end of life: is it a quality-of-care issue? *J Clin Oncol* 2008;26(23):3860-6. doi: 10.1200/JCO.2007.15.8253 [published Online First: 2008/08/09]
5. Earle CC, Neville BA, Landrum MB, et al. Trends in the aggressiveness of cancer care near the end of life. *J Clin Oncol* 2004;22(2):315-21. doi: 10.1200/JCO.2004.08.136 [published Online First: 2004/01/15]
6. Aitken PV, Jr. Incorporating advance care planning into family practice [see comment]. *Am Fam Physician* 1999;59(3):605-14, 17-20. [published Online First: 1999/02/25]
7. Tulsky JA. Improving quality of care for serious illness: findings and recommendations of the Institute of Medicine report on dying in America. *JAMA Intern Med* 2015;175(5):840-1. doi: 10.1001/jamainternmed.2014.8425 [published Online First: 2015/03/03]
8. Mack JW, Weeks JC, Wright AA, et al. End-of-life discussions, goal attainment, and distress at the end of life: predictors and outcomes of receipt of care consistent with preferences. *Journal of clinical oncology : official journal of the American Society of Clinical Oncology* 2010;28(7):1203-8. doi: 10.1200/jco.2009.25.4672 [published Online First: 2010/02/04]
9. Wright AA, Zhang B, Ray A, et al. Associations between end-of-life discussions, patient mental health, medical care near death, and caregiver bereavement adjustment. *JAMA : the journal of the American Medical Association* 2008;300(14):1665-73. doi: 10.1001/jama.300.14.1665 [published Online First: 2008/10/09]
10. Bernacki RE, Block SD, American College of Physicians High Value Care Task F. Communication about serious illness care goals: a review and synthesis of best practices. *JAMA Intern Med* 2014;174(12):1994-2003. doi: 10.1001/jamainternmed.2014.5271 [published Online First: 2014/10/21]
11. Mitchell SL, Kiely DK, Hamel MB. Dying with advanced dementia in the nursing home. *Arch Intern Med* 2004;164(3):321-6. doi: 10.1001/archinte.164.3.321 [published Online First: 2004/02/11]
12. Mitchell SL, Teno JM, Kiely DK, et al. The clinical course of advanced dementia. *N Engl J Med* 2009;361(16):1529-38. doi: 10.1056/NEJMoa0902234 [published Online First: 2009/10/16]
13. Thorne SE, Bultz BD, Baile WF, et al. Is there a cost to poor communication in cancer care?: a critical review of the literature. *Psychooncology* 2005;14(10):875-84; discussion 85-6. doi: 10.1002/pon.947 [published Online First: 2005/10/04]
14. Office of the Assistant Secretary for Planning and Evaluation. U.S. Department of Health and Human Services. Advance directives and advance care planning: Report to Congress, 2008.

15. Heyland DK, Barwich D, Pichora D, et al. Failure to engage hospitalized elderly patients and their families in advance care planning. *JAMA Intern Med* 2013;173(9):778-87. doi: 10.1001/jamainternmed.2013.180 [published Online First: 2013/04/03]
16. Emanuel LL, Barry MJ, Stoeckle JD, et al. Advance directives for medical care--a case for greater use. *The New England journal of medicine* 1991;324(13):889-95. doi: 10.1056/nejm199103283241305 [published Online First: 1991/03/28]
17. Emanuel LL, von Gunten CF, Ferris FD. Advance care planning. *Arch Fam Med* 2000;9(10):1181-7. [published Online First: 2000/12/15]
18. Morrison RS, Meier DE. High rates of advance care planning in New York City's elderly population. *Arch Intern Med* 2004;164(22):2421-6. doi: 10.1001/archinte.164.22.2421 [published Online First: 2004/12/15]
19. Billings JA. The need for safeguards in advance care planning. *J Gen Intern Med* 2012;27(5):595-600. doi: 10.1007/s11606-011-1976-2 [published Online First: 2012/01/13]
20. Billings JA, Bernacki R. Strategic targeting of advance care planning interventions: the Goldilocks phenomenon. *JAMA internal medicine* 2014;174(4):620-4. doi: 10.1001/jamainternmed.2013.14384 [published Online First: 2014/02/05]
21. Fagerlin A, Schneider CE. Enough. The failure of the living will. *Hastings Cent Rep* 2004;34(2):30-42. [published Online First: 2004/05/26]
22. Lakin JR, Block SD, Billings JA, et al. Improving Communication About Serious Illness in Primary Care: A Review. *JAMA internal medicine* 2016;176(9):1380-7. doi: 10.1001/jamainternmed.2016.3212 [published Online First: 2016/07/12]
23. Loewenstein G. Hot-cold empathy gaps and medical decision making. *Health Psychol* 2005;24(4S):S49-56. doi: 10.1037/0278-6133.24.4.S49 [published Online First: 2005/07/28]
24. Winter L, Parks SM, Diamond JJ. Ask a different question, get a different answer: why living wills are poor guides to care preferences at the end of life. *Journal of palliative medicine* 2010;13(5):567-72. doi: 10.1089/jpm.2009.0311 [published Online First: 2010/04/10]
25. Patel K, Janssen DJ, Curtis JR. Advance care planning in COPD. *Respirology* 2012;17(1):72-8. doi: 10.1111/j.1440-1843.2011.02087.x [published Online First: 2011/10/20]
26. Davison SN, Simpson C. Hope and advance care planning in patients with end stage renal disease: qualitative interview study. *BMJ* 2006;333(7574):886. doi: 10.1136/bmj.38965.626250.55 [published Online First: 2006/09/23]
27. Fischer GS, Tulskey JA, Rose MR, et al. Patient knowledge and physician predictions of treatment preferences after discussion of advance directives. *J Gen Intern Med* 1998;13(7):447-54. [published Online First: 1998/08/01]
28. Quill TE. Perspectives on care at the close of life. Initiating end-of-life discussions with seriously ill patients: addressing the "elephant in the room". *JAMA* 2000;284(19):2502-7. [published Online First: 2000/11/14]
29. Sharman SJ, Garry M, Jacobsen JA, et al. False memories for end-of-life decisions. *Health Psychol* 2008;27(2):291-6. doi: 10.1037/0278-6133.27.2.291 [published Online First: 2008/04/02]
30. Friedrichsen MJ, Strang PM, Carlsson ME. Breaking bad news in the transition from curative to palliative cancer care--patient's view of the doctor giving the information. *Support Care Cancer* 2000;8(6):472-8. [published Online First: 2000/11/30]

- 1  
2  
3 31. Detmar SB, Aaronson NK, Wever LD, et al. How are you feeling? Who wants to know?  
4 Patients' and oncologists' preferences for discussing health-related quality-of-life issues. *J*  
5 *Clin Oncol* 2000;18(18):3295-301. doi: 10.1200/JCO.2000.18.18.3295 [published Online  
6 First: 2000/09/14]
- 7  
8 32. Wenrich MD, Curtis JR, Shannon SE, et al. Communicating with dying patients within the  
9 spectrum of medical care from terminal diagnosis to death. *Arch Intern Med*  
10 2001;161(6):868-74. [published Online First: 2001/03/27]
- 11 33. Butow PN, Kazemi JN, Beeney LJ, et al. When the diagnosis is cancer: patient  
12 communication experiences and preferences. *Cancer* 1996;77(12):2630-7. doi:  
13 10.1002/(SICI)1097-0142(19960615)77:12<2630::AID-CNCR29>3.0.CO;2-S [published  
14 Online First: 1996/06/15]
- 15 34. Clark RE, LaBeff EE. Death telling: managing the delivery of bad news. *J Health Soc Behav*  
16 1982;23(4):366-80. [published Online First: 1982/12/01]
- 17 35. Eden OB, Black I, MacKinlay GA, et al. Communication with parents of children with  
18 cancer. *Palliat Med* 1994;8(2):105-14. doi: 10.1177/026921639400800203 [published  
19 Online First: 1994/01/01]
- 20 36. Ford S, Fallowfield L, Lewis S. Can oncologists detect distress in their out-patients and how  
21 satisfied are they with their performance during bad news consultations? *Br J Cancer*  
22 1994;70(4):767-70. [published Online First: 1994/10/01]
- 23 37. Ford S, Fallowfield L, Lewis S. Doctor-patient interactions in oncology. *Soc Sci Med*  
24 1996;42(11):1511-9. [published Online First: 1996/06/01]
- 25 38. Ptacek JT, Eberhardt TL. Breaking bad news. A review of the literature. *JAMA*  
26 1996;276(6):496-502. [published Online First: 1996/08/14]
- 27 39. Bakitas M, Lyons KD, Hegel MT, et al. Effects of a palliative care intervention on clinical  
28 outcomes in patients with advanced cancer: the Project ENABLE II randomized  
29 controlled trial. *JAMA* 2009;302(7):741-9. doi: 10.1001/jama.2009.1198 [published  
30 Online First: 2009/08/20]
- 31 40. Bakitas MA, Tosteson TD, Li Z, et al. Early Versus Delayed Initiation of Concurrent  
32 Palliative Oncology Care: Patient Outcomes in the ENABLE III Randomized Controlled  
33 Trial. *J Clin Oncol* 2015;33(13):1438-45. doi: 10.1200/JCO.2014.58.6362 [published  
34 Online First: 2015/03/25]
- 35 41. Hanson LC, Zimmerman S, Song MK, et al. Effect of the Goals of Care Intervention for  
36 Advanced Dementia: A Randomized Clinical Trial. *JAMA Intern Med* 2017;177(1):24-  
37 31. doi: 10.1001/jamainternmed.2016.7031 [published Online First: 2016/11/29]
- 38 42. Temel JS, Greer JA, Muzikansky A, et al. Early palliative care for patients with metastatic  
39 non-small-cell lung cancer. *N Engl J Med* 2010;363(8):733-42. doi:  
40 10.1056/NEJMoa1000678 [published Online First: 2010/09/08]
- 41 43. Thorpe KE, Zwarenstein M, Oxman AD, et al. A pragmatic-explanatory continuum indicator  
42 summary (PRECIS): a tool to help trial designers. *Journal of clinical epidemiology*  
43 2009;62(5):464-75. doi: 10.1016/j.jclinepi.2008.12.011 [published Online First:  
44 2009/04/08]
- 45 44. Ford I, Norrie J. Pragmatic Trials. *N Engl J Med* 2016;375(5):454-63. doi:  
46 10.1056/NEJMra1510059 [published Online First: 2016/08/16]
- 47 45. Chan A-W, Tetzlaff JM, Altman DG, et al. SPIRIT 2013 Statement: Defining standard  
48 protocol items for clinical trials. *Ann Intern Med*. 2013;158(3):200-207
- 49  
50  
51  
52  
53  
54  
55  
56  
57  
58  
59  
60



- 1  
2  
3 46. Back AL, Arnold RM, Baile WF, et al. Efficacy of communication skills training for giving  
4 bad news and discussing transitions to palliative care. *Archives of internal medicine*  
5 2007;167(5):453-60. doi: 10.1001/archinte.167.5.453 [published Online First:  
6 2007/03/14]
- 7  
8 47. Back AL, Arnold RM, Baile WF, et al. Faculty development to change the paradigm of  
9 communication skills teaching in oncology. *Journal of clinical oncology : official journal*  
10 *of the American Society of Clinical Oncology* 2009;27(7):1137-41. doi:  
11 10.1200/jco.2008.20.2408 [published Online First: 2009/01/28]
- 12  
13 48. Back AL, Arnold RM, Tulskey JA, et al. Teaching communication skills to medical oncology  
14 fellows. *Journal of clinical oncology : official journal of the American Society of Clinical*  
15 *Oncology* 2003;21(12):2433-6. doi: 10.1200/jco.2003.09.073 [published Online First:  
16 2003/06/14]
- 17  
18 49. Clayton JM, Adler JL, O'Callaghan A, et al. Intensive communication skills teaching for  
19 specialist training in palliative medicine: development and evaluation of an experiential  
20 workshop. *Journal of palliative medicine* 2012;15(5):585-91. doi:  
21 10.1089/jpm.2011.0292 [published Online First: 2012/03/22]
- 22  
23 50. Clayton JM, Butow PN, Waters A, et al. Evaluation of a novel individualised  
24 communication-skills training intervention to improve doctors' confidence and skills in  
25 end-of-life communication. *Palliat Med* 2013;27(3):236-43. doi:  
26 10.1177/0269216312449683 [published Online First: 2012/06/20]
- 27  
28 51. Fryer-Edwards K, Arnold RM, Baile W, et al. Reflective teaching practices: an approach to  
29 teaching communication skills in a small-group setting. *Acad Med* 2006;81(7):638-44.  
30 doi: 10.1097/01.ACM.0000232414.43142.45 [published Online First: 2006/06/27]
- 31  
32 52. Tulskey JA, Arnold RM, Alexander SC, et al. Enhancing communication between oncologists  
33 and patients with a computer-based training program: a randomized trial. *Annals of*  
34 *internal medicine* 2011;155(9):593-601. doi: 10.7326/0003-4819-155-9-201111010-  
35 00007 [published Online First: 2011/11/02]
- 36  
37 53. Cohen SM, Volandes AE, Shaffer ML, et al. Concordance Between Proxy Level of Care  
38 Preference and Advance Directives Among Nursing Home Residents With Advanced  
39 Dementia: A Cluster Randomized Clinical Trial. *J Pain Symptom Manage*  
40 2019;57(1):37-46 e1. doi: 10.1016/j.jpainsymman.2018.09.018 [published Online First:  
41 2018/10/03]
- 42  
43 54. Deep KS, Hunter A, Murphy K, et al. "It helps me see with my heart": how video informs  
44 patients' rationale for decisions about future care in advanced dementia. *Patient Educ*  
45 *Couns* 2010;81(2):229-34. doi: 10.1016/j.pec.2010.02.004 [published Online First:  
46 2010/03/03]
- 47  
48 55. El-Jawahri A, Paasche-Orlow MK, Matlock D, et al. Randomized, Controlled Trial of an  
49 Advance Care Planning Video Decision Support Tool for Patients With Advanced Heart  
50 Failure. *Circulation* 2016;134(1):52-60. doi: 10.1161/CIRCULATIONAHA.116.021937  
51 [published Online First: 2016/07/01]
- 52  
53 56. El-Jawahri A, Podgurski LM, Eichler AF, et al. Use of video to facilitate end-of-life  
54 discussions with patients with cancer: a randomized controlled trial. *J Clin Oncol*  
55 2010;28(2):305-10. doi: 10.1200/JCO.2009.24.7502 [published Online First: 2009/12/02]
- 56  
57 57. Epstein AS, Volandes AE, Chen LY, et al. A randomized controlled trial of a  
58 cardiopulmonary resuscitation video in advance care planning for progressive pancreas  
59

- 1  
2  
3 and hepatobiliary cancer patients. *Journal of palliative medicine* 2013;16(6):623-31. doi:  
4 10.1089/jpm.2012.0524 [published Online First: 2013/06/04]  
5  
6 58. McCannon JB, O'Donnell WJ, Thompson BT, et al. Augmenting communication and  
7 decision making in the intensive care unit with a cardiopulmonary resuscitation video  
8 decision support tool: a temporal intervention study. *Journal of palliative medicine*  
9 2012;15(12):1382-7. doi: 10.1089/jpm.2012.0215 [published Online First: 2012/10/27]  
10  
11 59. Quintiliani LM, Murphy JE, Buitron de la Vega P, et al. Feasibility and Patient Perceptions  
12 of Video Declarations Regarding End-of-Life Decisions by Hospitalized Patients. *Journal*  
13 *of palliative medicine* 2018;21(6):766-72. doi: 10.1089/jpm.2017.0351 [published Online  
14 First: 2018/04/13]  
15  
16 60. Volandes AE, Ariza M, Abbo ED, et al. Overcoming educational barriers for advance care  
17 planning in Latinos with video images. *Journal of palliative medicine* 2008;11(5):700-6.  
18 doi: 10.1089/jpm.2007.0172 [published Online First: 2008/07/01]  
19  
20 61. Volandes AE, Barry MJ, Chang Y, et al. Improving decision making at the end of life with  
21 video images. *Med Decis Making* 2010;30(1):29-34. doi: 10.1177/0272989X09341587  
22 [published Online First: 2009/08/14]  
23  
24 62. Volandes AE, Brandeis GH, Davis AD, et al. A randomized controlled trial of a goals-of-care  
25 video for elderly patients admitted to skilled nursing facilities. *Journal of palliative*  
26 *medicine* 2012;15(7):805-11. doi: 10.1089/jpm.2011.0505 [published Online First:  
27 2012/05/09]  
28  
29 63. Volandes AE, Ferguson LA, Davis AD, et al. Assessing end-of-life preferences for advanced  
30 dementia in rural patients using an educational video: a randomized controlled trial.  
31 *Journal of palliative medicine* 2011;14(2):169-77. doi: 10.1089/jpm.2010.0299  
32 [published Online First: 2011/01/25]  
33  
34 64. Volandes AE, Lehmann LS, Cook EF, et al. Using video images of dementia in advance care  
35 planning. *Arch Intern Med* 2007;167(8):828-33. doi: 10.1001/archinte.167.8.828  
36 [published Online First: 2007/04/25]  
37  
38 65. Volandes AE, Levin TT, Slovin S, et al. Augmenting advance care planning in poor  
39 prognosis cancer with a video decision aid: a preintervention-postintervention study.  
40 *Cancer* 2012;118(17):4331-8. doi: 10.1002/cncr.27423 [published Online First:  
41 2012/01/19]  
42  
43 66. Volandes AE, Mitchell SL, Gillick MR, et al. Using video images to improve the accuracy of  
44 surrogate decision-making: a randomized controlled trial. *J Am Med Dir Assoc*  
45 2009;10(8):575-80. doi: 10.1016/j.jamda.2009.05.006 [published Online First:  
46 2009/10/08]  
47  
48 67. Volandes AE, Paasche-Orlow M, Gillick MR, et al. Health literacy not race predicts end-of-  
49 life care preferences. *Journal of palliative medicine* 2008;11(5):754-62. doi:  
50 10.1089/jpm.2007.0224 [published Online First: 2008/07/01]  
51  
52 68. Volandes AE, Paasche-Orlow MK, Barry MJ, et al. Video decision support tool for advance  
53 care planning in dementia: randomised controlled trial. *BMJ* 2009;338:b2159. doi:  
54 10.1136/bmj.b2159 [published Online First: 2009/05/30]  
55  
56 69. Volandes AE, Paasche-Orlow MK, Davis AD, et al. Use of Video Decision Aids to Promote  
57 Advance Care Planning in Hilo, Hawai'i. *J Gen Intern Med* 2016;31(9):1035-40. doi:  
58 10.1007/s11606-016-3730-2 [published Online First: 2016/05/20]  
59  
60 70. Volandes AE, Paasche-Orlow MK, Mitchell SL, et al. Randomized controlled trial of a video  
decision support tool for cardiopulmonary resuscitation decision making in advanced

- 1  
2  
3 cancer. *J Clin Oncol* 2013;31(3):380-6. doi: 10.1200/JCO.2012.43.9570 [published  
4 Online First: 2012/12/13]
- 5 71. El Jawahri A, Temel JS, Ramachandran KJ, et al. A randomized controlled trial of a CPR  
6 video decision support tool for seriously ill hospitalized patients with advanced cancer.  
7 ASCO Annual Meeting, 2015.
- 8 72. El-Jawahri A, Mitchell SL, Paasche-Orlow MK, et al. A Randomized Controlled Trial of a  
9 CPR and Intubation Video Decision Support Tool for Hospitalized Patients. *J Gen Intern  
10 Med* 2015;30(8):1071-80. doi: 10.1007/s11606-015-3200-2 [published Online First:  
11 2015/02/19]
- 12 73. Washington State Health Care Authority. Patient Decision Aids.  
13 <https://www.hca.wa.gov/about-hca/healthier-washington/patient-decision-aids-pdas>.  
14 Accessed May 11, 2020.
- 15 74. Dyer N, Sorra JS, Smith SA, et al. Psychometric properties of the Consumer Assessment of  
16 Healthcare Providers and Systems (CAHPS(R)) Clinician and Group Adult Visit Survey.  
17 *Medical care* 2012;50 Suppl:S28-34. doi: 10.1097/MLR.0b013e31826cbc0d [published  
18 Online First: 2012/10/25]
- 19 75. Mukherjee S, Rodriguez HP, Elliott MN, et al. Modern psychometric methods for estimating  
20 physician performance on the Clinician and Group CAHPS survey. *Health Serv  
21 Outcomes Res Method* 2013;13:109-23. doi: 10.1007/s10742-013-0111-8
- 22 76. Holmes-Rovner M, Kroll J, Schmitt N, et al. Patient Satisfaction with Health Care  
23 Decisions: The Satisfaction with Decision Scale. 1996;16(1):58-64. doi:  
24 10.1177/0272989x9601600114
- 25 77. Brehaut JC, O'Connor AM, Wood TJ, et al. Validation of a decision regret scale. *Med Decis  
26 Making* 2003;23(4):281-92. doi: 10.1177/0272989x03256005 [published Online First:  
27 2003/08/21]
- 28 78. Goel V, Sawka CA, Thiel EC, et al. Randomized trial of a patient decision aid for choice of  
29 surgical treatment for breast cancer. *Med Decis Making* 2001;21(1):1-6. doi:  
30 10.1177/0272989x0102100101 [published Online First: 2001/02/24]
- 31 79. Hassett MJ, Ritzwoller DP, Taback N, et al. Validating billing/encounter codes as indicators  
32 of lung, colorectal, breast, and prostate cancer recurrence using 2 large contemporary  
33 cohorts. *Medical care* 2014;52(10):e65-73. doi: 10.1097/MLR.0b013e318277eb6f  
34 [published Online First: 2012/12/12]
- 35 80. Lindvall C, Lilley EJ, Zupanc SN, et al. Natural Language Processing to Assess End-of-Life  
36 Quality Indicators in Cancer Patients Receiving Palliative Surgery. *Journal of palliative  
37 medicine* 2019;22(2):183-87. doi: 10.1089/jpm.2018.0326 [published Online First:  
38 2018/10/18]
- 39 81. Poort H, Zupanc SN, Leiter RE, et al. Documentation of Palliative and End-of-Life Care  
40 Process Measures Among Young Adults Who Died of Cancer: A Natural Language  
41 Processing Approach. *J Adolesc Young Adult Oncol* 2019 doi: 10.1089/jayao.2019.0040  
42 [published Online First: 2019/08/15]
- 43 82. Udelsman BV, Lilley EJ, Qadan M, et al. Deficits in the Palliative Care Process Measures in  
44 Patients with Advanced Pancreatic Cancer Undergoing Operative and Invasive  
45 Nonoperative Palliative Procedures. *Ann Surg Oncol* 2019 doi: 10.1245/s10434-019-  
46 07757-2 [published Online First: 2019/08/30]
- 47  
48  
49  
50  
51  
52  
53  
54  
55  
56  
57  
58  
59  
60

- 1  
2  
3 83. Wright A. REDCap: A Tool for the Electronic Capture of Research Data. *Journal of*  
4 *Electronic Resources in Medical Libraries* 2016;13(4):197-201. doi:  
5 10.1080/15424065.2016.1259026  
6  
7 84. Pugno PA. Advance directives in the primary care setting. *Wiener klinische Wochenschrift*  
8 2004;116(13):417-9. [published Online First: 2004/09/04]  
9  
10 85. Hughes JP, Granston TS, Heagerty PJ. Current issues in the design and analysis of stepped  
11 wedge trials. *Contemp Clin Trials* 2015;45(Pt A):55-60. doi: 10.1016/j.cct.2015.07.006  
12 [published Online First: 2015/08/08]  
13  
14 86. Hooper R, Bourke L. Cluster randomised trials with repeated cross sections: alternatives to  
15 parallel group designs. *BMJ* 2015;350:h2925. doi: 10.1136/bmj.h2925 [published Online  
16 First: 2015/06/10]  
17  
18 87. Hooper R, Teerenstra S, de Hoop E, et al. Sample size calculation for stepped wedge and  
19 other longitudinal cluster randomised trials. *Stat Med* 2016;35(26):4718-28. doi:  
20 10.1002/sim.7028 [published Online First: 2016/06/29]  
21  
22  
23  
24  
25  
26  
27  
28  
29  
30  
31  
32  
33  
34  
35  
36  
37  
38  
39  
40  
41  
42  
43  
44  
45  
46  
47  
48  
49  
50  
51  
52  
53  
54  
55  
56  
57  
58  
59  
60

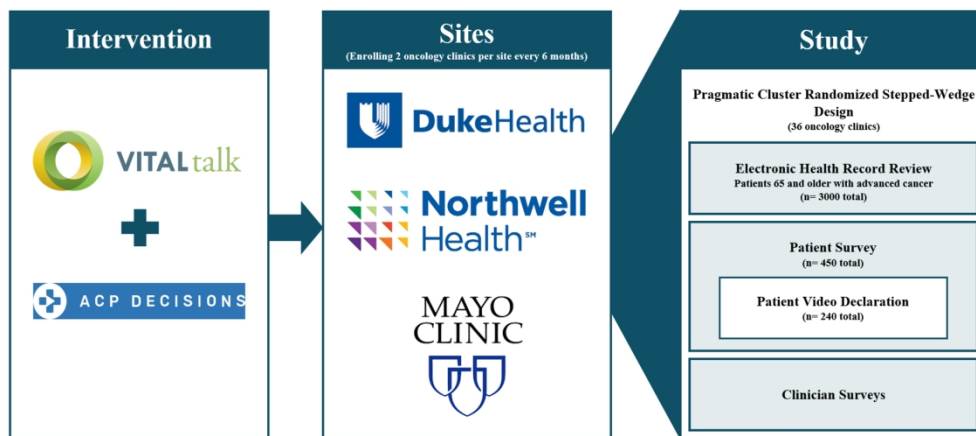

Figure 1. ACP-PEACE Model

157x70mm (300 x 300 DPI)

1  
2  
3  
4  
5  
6  
7  
8  
9  
10  
11  
12  
13  
14  
15  
16  
17  
18  
19  
20  
21  
22  
23  
24  
25  
26  
27  
28  
29  
30  
31  
32  
33  
34  
35  
36  
37  
38  
39  
40  
41  
42  
43  
44  
45  
46  
47  
48  
49  
50  
51  
52  
53  
54  
55  
56  
57  
58  
59  
60

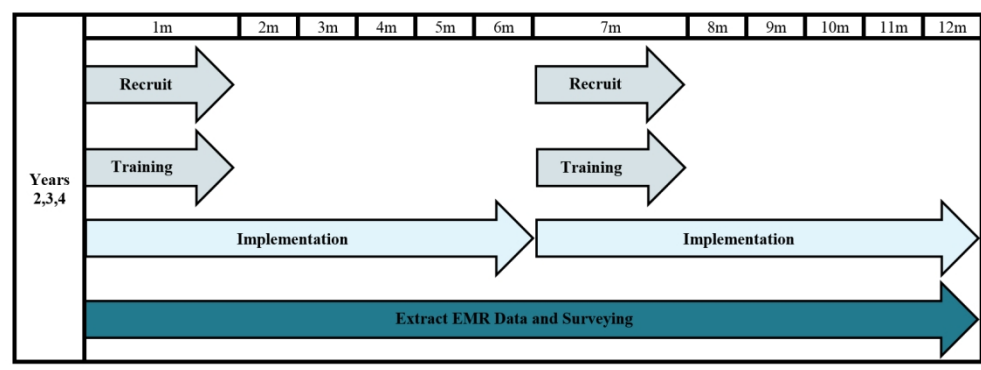

Figure 2. Stepped-Wedge Recruitment and Implementation Yearly Timeline (repeated each year)

144x53mm (300 x 300 DPI)

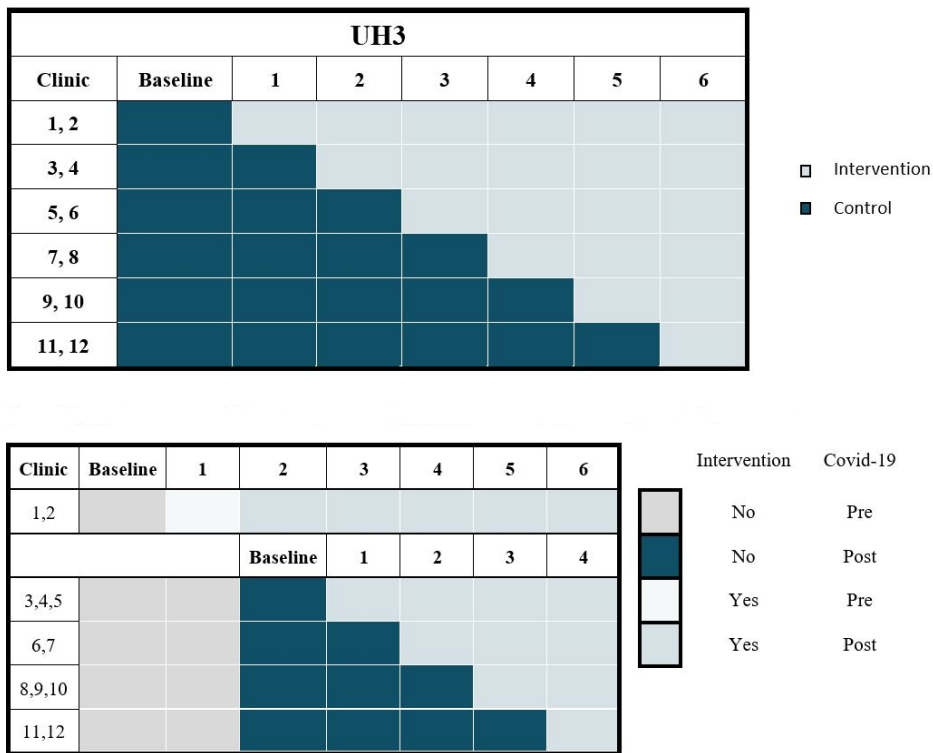

Figure 3a. Original Stepped-Wedge Cluster Randomization Scheme within Each Health Care System  
 Figure 3b. Modified Stepped-Wedge Cluster Randomization Scheme within Each Health Care System

291x242mm (96 x 96 DPI)

## APPENDIX

### VIDEO DECLARATION PROCEDURES

For the video declarations, the RA introduces the concept to patients with a standardized introduction that is piloted during the UG3 phase and modified as needed. The RA uses the camera on a tablet computer, ensuring that the tablet is situated in such a way that the patient cannot see themselves on screen while they are talking, and records the subject. The RA will then guide the subject to create a video declaration through a series of prompting questions. The subject answers each prompt, and at the end, the RA will merge all responses to create a continuous video, removing the RA's voice. The prompts include: 1) What's most important to you? 2) What concerns do you have about getting sick? 3) If you were very sick, are there any specific medical treatments that you do or do not want? Please think about things like having CPR if your heart stopped beating or having a breathing tube if you stopped breathing. 4) What spiritual beliefs do you have that might influence your medical decisions? In the UG3 phase, half of patients will be asked to answer question 3 without the second half of the prompt – specifically naming medical treatments with the aim of helping to inform our decisions about the usefulness of providing information on treatment decisions for the video declarations in the UH3 phase. After the recording is completed, the RA plays the video for the subject to ensure they feel it accurately represents their preferences. Patients may re-film their video declaration as many times as they want to ensure their preferences are accurately described. Once the patient approves the video, the RA discusses the process by which patients will share it with clinicians, family, or whomever else they wish to include. Patients have the option of receiving the video on a USB drive, through DropBox, or as an unlisted video on YouTube.



1  
2  
3 We will qualitatively analyze video declarations by first transcribing recordings verbatim  
4 and adding in any relevant non-verbal information, such as expressions of hesitation or sadness.  
5  
6 We then draft a preliminary coding framework using an existing framework of cancer-specific  
7  
8 palliative care.<sup>88</sup> We plan to include the following among our primary coding categories: 1)  
9  
10 advance care planning; 2) acute issues; 3) psychosocial issues; 4) after death wishes; and 5)  
11  
12 existential and spiritual issues. We begin by coding 15 videos (5 from each site) using this  
13  
14 preliminary framework and then add further codes to include other emerging themes. Members  
15  
16 from the entire research team review the revised coding structure and approve the final coding  
17  
18 framework for coding the remaining transcripts, which is done independently by RAs at each  
19  
20 site. Coders attend monthly phone meetings to review coding progress and resolve discrepancies  
21  
22 until coding is complete. To enhance the trustworthiness of the analysis,<sup>89</sup> we will hold at least  
23  
24 two peer debriefing meetings with the entire research team to show them the transcripts and the  
25  
26 codes applied and ask for their feedback. Results from these meetings will be incorporated into  
27  
28 the ongoing coding process. Finalized codes will be summarized into themes to be presented  
29  
30 descriptively and accompanied by illustrative quotations highlighting the content. We are using  
31  
32 NVIVO version 11 qualitative software to assist in data management. We anticipate that we will  
33  
34 use the coding structure developed during the UG3 phase, but we will continue our plan of  
35  
36 group-based coding with peer debriefing during the UH3 phase as well. Further analysis of the  
37  
38 video declarations will examine the clarity and comprehensiveness with which the patients  
39  
40 communicate their preferences (i.e., would a clinician watching the video understand how to  
41  
42 enact this patient's advance directive) and will compare what is presented in the video  
43  
44 declaration with preferences as codified in the patient's medical record documentation.  
45  
46  
47  
48  
49  
50  
51  
52  
53  
54  
55  
56  
57  
58  
59  
60

## SURVEY INSTRUMENTS

Clinician Survey

## 1. Age:

## 2. Gender:

 Male Female Transgender I prefer not to answer

## 3. What is your ethnic/race background:

 American Indian or Alaska Native White Asian More than one race \_\_\_\_\_ Black or African American Other (specify) \_\_\_\_\_ Native Hawaiian or other Pacific Islander Unknown or not reported

## 4. Do you consider yourself to be Hispanic or Latino?

 Yes No

## 5. What is your religion?

 Christian Buddhist/Hindu/Eastern Jewish No Affiliation Islamic/Muslim Other (specify) \_\_\_\_\_

## 6. On a scale of 0-100, (0 being not strong at all, 100 being very strong), how strong an influence do you consider your religious/spiritual beliefs and practices to be in your life?

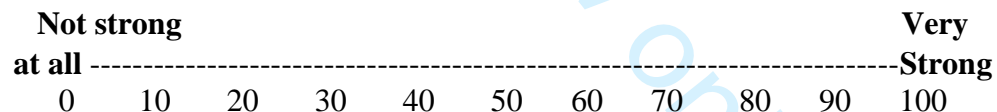

## 7. How many years have you been in practice since completing your training?

 0-5 6-10 11-15 16-20 20+

## 8. How many hours do you spend per week in direct patient care?

- 1  
2  
3  0-10  
4  11-20  
5  
6  21-30  
7  31-40  
8  > 40  
9

10  
11 **9. Prior to this study, and during any of the following stages of your career, have you**  
12 **participated in clinician-patient communication skills training? Please respond**  
13 **below for...** (We refer here to any kind of workshop, seminar, or interactive on-line  
14 training that specifically instructed you on effective ways or talking to your patients. We  
15 do not include attending single lectures without interactive or practice elements.)  
16

- 17  
18 **A) Professional school (PA, nursing, medical school, etc.)?** Y/N  
19 **B) Residency (if applicable)?** Y/N  
20 **C) Fellowship (if applicable)?** Y/N  
21 **D) Post-training clinical practice?** Y/N  
22

23 **10. Have you ever attended a VitalTalk course?** Y/N  
24

25 **Health care providers commonly try to balance all aspects of patient care, including the**  
26 **social and emotional aspects of patient care and the technological and scientific aspects.**  
27 **Virtually no one is exactly equal on these two aspects.**  
28

29  
30 **11. Do you think you are more inclined toward social and emotional aspects of patient**  
31 **care or more inclined toward the technological and scientific aspects?**

- 32  Social & emotional  
33  Technological & scientific  
34

35  
36 **12. Are you a little more inclined to the aspects you chose in the last question or a lot**  
37 **more inclined?**

- 38  A little more inclined  
39  A lot more inclined  
40

41  
42 **Thank you again for your time. The survey is complete.**  
43  
44  
45  
46  
47  
48  
49  
50  
51  
52  
53  
54  
55  
56  
57  
58  
59  
60

## Patient Survey

Verbally Administered by Research Assistant

1. How confident are you that you will get the type of medical care you want if you become seriously ill and could no longer communicate your preferences?

- <sup>1</sup>  Not at all confident  
<sup>2</sup>  Slightly confident  
<sup>3</sup>  Somewhat confident  
<sup>4</sup>  Fairly confident  
<sup>5</sup>  Very confident

When answering the following questions, please think about the primary provider who has been treating your cancer.

2. Who do you consider to be your primary cancer provider?

- <sup>1</sup>  Oncologist  
<sup>2</sup>  Oncology Nurse Practitioner  
<sup>3</sup>  Oncology Physician Assistant  
<sup>4</sup>  Other (What is the role of that provider: \_\_\_\_\_)

3. In general, how often does this provider explain things in a way that is easy to understand?

- <sup>1</sup>  Never  
<sup>2</sup>  Sometimes  
<sup>3</sup>  Usually  
<sup>4</sup>  Always

4. In general, how often does this provider listen carefully to you?

- <sup>1</sup>  Never  
<sup>2</sup>  Sometimes  
<sup>3</sup>  Usually  
<sup>4</sup>  Always

5. In general, how often does this provider seem to know the important information about your medical history?

- <sup>1</sup>  Never  
<sup>2</sup>  Sometimes  
<sup>3</sup>  Usually  
<sup>4</sup>  Always

6. In general, how often does this provider show respect for what you have to say?

- 1  
2  
3  Never  
4  Sometimes  
5  Usually  
6  Always  
7  
8  
9

10 7. In general, how often does this provider spend enough time with you?

- 11  Never  
12  Sometimes  
13  Usually  
14  Always  
15  
16

17 8. Using any number from 0 to 10, where 0 is the worst provider possible and 10 is the  
18 best provider possible, what number would you use to rate this provider?

- 19  0 Worst provider possible  
20  1  
21  2  
22  3  
23  4  
24  5  
25  6  
26  7  
27  8  
28  9  
29  10 Best provider possible  
30  
31  
32  
33  
34  
35

36 9. Has your oncology team discussed with you what to expect with your illness in the  
37 future?

- 38  Yes, definitely  
39  Yes, somewhat  
40  No  
41  
42  
43

44 10. Has your oncology team ever asked what's most important to you?

- 45  Yes, definitely  
46  Yes, somewhat  
47  No  
48  
49

50 11. Has your oncology team talked about how the treatment plan should match what is  
51 most important to you?  
52  
53  
54  
55  
56  
57  
58  
59  
60

- 1  
2  
3  Yes, definitely  
4  Yes, somewhat  
5  
6  No  
7

8  
9 When answering the following questions, please think about the last decision about your  
10 cancer treatment you made together with a health care provider.  
11

12 12. I am satisfied that I was adequately informed about the issues important to my  
13 decision.

- 14  Strongly disagree  
15  Disagree  
16  Neither agree nor disagree  
17  Agree  
18  Strongly agree  
19  
20  
21

22  
23 13. The decision I made was the best decision possible for me personally.

- 24  Strongly disagree  
25  Disagree  
26  Neither agree nor disagree  
27  Agree  
28  Strongly agree  
29  
30  
31

32 14. I am satisfied that my decision was consistent with my personal values.

- 33  Strongly disagree  
34  Disagree  
35  Neither agree nor disagree  
36  Agree  
37  Strongly agree  
38  
39  
40

41 15. I expect to successfully carry out (or continue to carry out) the decision I made.

- 42  Strongly disagree  
43  Disagree  
44  Neither agree nor disagree  
45  Agree  
46  Strongly agree  
47  
48  
49

50 16. I am satisfied that this was my decision to make.

- 51  Strongly disagree  
52  Disagree  
53  Neither agree nor disagree  
54  Agree  
55  
56  
57  
58  
59  
60

1  
2  
3  Strongly agree  
4  
5

6 17. I am satisfied with my decision.

7  Strongly disagree

8  Disagree

9  Neither agree nor disagree

10  Agree

11  Strongly agree  
12  
13  
14

15 When answering the following questions, please think about the last decision about your cancer  
16 treatment you made together with a health care provider.  
17  
18

19 18. It was the right decision.

20  Strongly disagree

21  Disagree

22  Neither agree nor disagree

23  Agree

24  Strongly agree  
25  
26  
27

28 19. I regret the choice that was made.

29  Strongly disagree

30  Disagree

31  Neither agree nor disagree

32  Agree

33  Strongly agree  
34  
35  
36

37 20. I would go for the same choice if I had to do it over again.

38  Strongly disagree

39  Disagree

40  Neither agree nor disagree

41  Agree

42  Strongly agree  
43  
44  
45

46 21. The choice did me a lot of harm.

47  Strongly disagree

48  Disagree

49  Neither agree nor disagree

50  Agree

51  Strongly agree  
52  
53  
54

55 22. The decision was a wise one.  
56  
57  
58  
59  
60

- 1  
2  
3  Strongly disagree  
4  Disagree  
5  
6  Neither agree nor disagree  
7  Agree  
8  Strongly agree  
9

10  
11 23. Have you talked with a family member or close friend about the types of medical care  
12 you want or don't want if you become seriously ill in the future and could no longer  
13 communicate your preferences?  
14

- 15  No  
16  Yes  
17

18  
19 20a. Of those listed below, who was that person/those people? (Select all that apply)

- 20  Spouse/partner  
21  Daughter  
22  Son  
23  Daughter-in-law  
24  Son-in-law  
25  Stepdaughter  
26  Stepson  
27  Sister  
28  Brother  
29  Sister-in-law  
30  Brother-in-law  
31  Mother  
32  Stepmother  
33  Mother-in-law  
34  Father  
35  Father-in-law  
36  Granddaughter  
37  Grandson  
38  Niece  
39  Nephew  
40  Aunt  
41  Cousin  
42  Stepdaughter's son/daughter  
43  Stepson's son/daughter  
44  Daughter-in-law's son/daughter  
45  Son-in-law's son/daughter  
46  Boarder/renter  
47  Paid aide/Housekeeper/Employee  
48  
49  
50  
51  
52  
53  
54  
55  
56  
57  
58  
59  
60



- 1  
2  
3 29  Roommate  
4 30  Ex-wife/Ex-husband  
5 31  Boyfriend/girlfriend  
6 32  Neighbor  
7 33  Friend  
8 34  Service/Someone from the place you live  
9 35  Co-worker  
10 36  Minister, Priest, or other Clergy  
11 37  Psychiatrist, Psychologist, Counselor, or Therapist  
12 38  Other Relative  
13 39  Other Non-Relative  
14  
15  
16  
17  
18  
19  
20  
21  
22  
23  
24  
25  
26  
27  
28  
29  
30  
31  
32  
33  
34  
35  
36  
37  
38  
39  
40  
41  
42  
43  
44  
45  
46  
47  
48  
49  
50  
51  
52  
53  
54  
55  
56  
57  
58  
59  
60

## Research Consent Form for Non-Clinical Research

Dana-Farber/ Harvard Cancer Center

BIDMC/BCH/BWH/DFCI/MGH/Partners Network Affiliates

OHRs 10.02.2017

**Protocol Title:** Advance Care Planning: Promoting Effective and Aligned Communication in the Elderly

**DF/HCC Principal Research Investigator / Institution:** James Tulsky, MD/DFCI

**DF/HCC Site-Responsible Research Investigator(s) / Institution(s):**

James Tulsky, MD/DFCI

Angelo Volandes, MD/MGH

### A. INTRODUCTION

We are inviting you to take part in a research study. Research is a way of gaining new knowledge. A person who participates in a research study is called a “participant.” In this research study, we are working to help oncologists better serve patients by delivering more patient-centered medical care that is consistent with what patients want and their underlying goals and values.

The goal of this study is to test an intervention that seeks to increase the likelihood that older patients’ values and goals are incorporated into cancer care decision-making.

It is expected that about 12,000 people will take part in this research study. An institution that is supporting a research study either by giving money or supplying something that is important for the research is called the “sponsor.” The sponsor of this protocol is the National Institutes of Health (NIH) and the study will run for 5 years. This research consent form explains why this research study is being done, what is involved in participating in the research study, the possible risks and benefits of participation, alternatives to participation, and your rights as a research participant. The decision to participate is yours. If you decide to participate, please sign and date at the end of the form. We will give you a copy so that you can refer to it while you are involved in this research study.

You have been chosen to participate in this study, based on your doctor’s recommendation and because you are an older adult with advanced cancer.

## Research Consent Form for Non-Clinical Research

Dana-Farber/ Harvard Cancer Center

BIDMC/BCH/BWH/DFCI/MGH/Partners Network Affiliates

OHRs 10.02.2017

Your doctor felt that you might be willing to talk about your goals and wishes related to your medical care so your doctors and family can understand what is most important for you. You have been chosen to participate in this study, based on your doctor's recommendation. (Some de-identified information was provided to us through your medical records).

We encourage you to take some time to think this over and to discuss it with other people and to ask questions now and at any time in the future.

Dr. Angelo Volandes, a Massachusetts General Hospital (MGH) Investigator on this study, and his spouse are co-founders of and receive income from ACP Decisions Nous, a nonprofit organization developing the advanced care planning video decision support tools being evaluated in this study. Dr. Volandes' financial interests have been reviewed and are managed by Massachusetts General Hospital and Partners HealthCare in accordance with their conflict of interest policies. MGH will only be receiving de-identified data.

### **B. WHY IS THIS RESEARCH STUDY BEING DONE?**

The purpose of this study is to improve the quality of care provided to older Americans with cancer. We are working to help oncologists better serve patients by delivering more patient-centered medical care that is consistent with what patients want.

### **C. WHAT OTHER OPTIONS ARE THERE?**

Taking part in this research study is voluntary. You may choose not to be in the study, or, if you agree to be in the study, you may withdraw from the study at any time. If you withdraw from the study, no new data about you will be collected for study purposes.

If you participate, we will also ask if you wish to create a video of yourself describing what is important to you, any worries you have, and your preferences for medical care. We call these "video declarations."

- A Research Assistant will also ask you to complete a written video declaration.

## Research Consent Form for Non-Clinical Research

Dana-Farber/ Harvard Cancer Center

BIDMC/BCH/BWH/DFCI/MGH/Partners Network Affiliates

OHSR 10.02.2017

- If you agree, we will record that declaration.
- We will ask you to talk about your Advance Care Planning preferences, for medical care so your doctors and family can understand what is most important for you.
- We will show your video to you when you are done.
- If you aren't happy with the video, you can record it again.
- When the recording is complete, the RA will play the video for you to see if you feel it accurately represents your preferences.
- There might be occasions when we would like to publicly share the information that we have learned through this research for demonstration purposes and at similar venues. We will provide you with an option to let us know if you are willing to publicly share your video via in-person or online webinar/lecture.

### **This visit will involve the following:**

- **Recording a personal video declaration that includes both video and audio recording**

### **D. HOW LONG WILL I BE IN THIS RESEARCH STUDY?**

You will be in this research study for the length of time that your scheduled appointment will take. After you complete the interview and video recording, investigators will continue to have access to your medical record and video for the purpose of analyzing the study outcomes.

You may be taken off the research study for reasons such as:

- It is considered to be in your best interest
- There is any problem with following study procedures
- There are any problems with research funding
- Or for any other reason

If you are removed from the research study, the research Investigator will explain to you why you were removed.

In addition, you can stop participating in the research study at any time.

## Research Consent Form for Non-Clinical Research

Dana-Farber/ Harvard Cancer Center

BIDMC/BCH/BWH/DFCI/MGH/Partners Network Affiliates

OHRS 10.02.2017

### **E. WHAT ARE THE RISKS OR DISCOMFORTS OF THE RESEARCH STUDY?**

There are risks to taking part in any research study, but the risks in this study are small and non-medical. The main risk is loss of confidentiality. You might become a little uncomfortable, sad, or even distressed as you contemplate serious illness with your provider, and there will be clinicians trained to help you with any discomfort you might feel.

During the research study, you will be provided with any new information that may affect your health or willingness to participate. You may be asked to sign a new consent form that shows that you have been informed of new information relating to this research study.

### **F. WHAT ARE THE BENEFITS OF THE RESEARCH STUDY?**

Taking part in this research study may or may not benefit you. We hope the information learned from this research study will help you and your doctors in the clinics to benefit from the study by having your treatments better aligned with your preferences. There is the potential for the results learned from the study to help us to improve the Advance Care Planning of the overall outpatient clinic population, and particularly those with advanced cancer. There is the potential to validate an intervention that could ensure that treatments are better aligned with patients' preferences.

### **G. CAN I STOP BEING IN THE RESEARCH STUDY AND WHAT ARE MY RIGHTS?**

You have the right to choose not to sign this form. If you decide not to sign this form, you cannot participate in this research study.

You can stop being in the research study at any time. Tell the research doctor if you are thinking about stopping or decide to stop. Leaving the research study will not affect your medical care. You can still get your medical care from your hospital or Investigator.

If you choose to not participate, or if you are not eligible to participate, or if you withdraw from this research study, this will not affect your present or future care and will not cause any penalty or loss of benefits to which you are otherwise entitled.

## Research Consent Form for Non-Clinical Research

Dana-Farber/ Harvard Cancer Center

BIDMC/BCH/BWH/DFCI/MGH/Partners Network Affiliates

OHRs 10.02.2017

### H. WHAT ARE THE COSTS?

There is no cost to you for participating in this study.

### I. WHAT ABOUT CONFIDENTIALITY?

We will take measures to protect the privacy and security of all your personal information, but we cannot guarantee complete confidentiality of study data. All staff with access to information will be trained in privacy protection rules. Any personal information will be kept on a single central protected server with 24/7 security monitoring.

Applications will be designed with data security as the first goal and will be carefully reviewed for security prior to usage in the study. Participating oncologists will also be instructed on strict procedures to ensure the privacy and security of the video recordings at all levels of the data collection and storage process. The only people who will see this information will be study staff, investigators, other investigators who have been authorized by the research team to conduct analyses, and also those who have a contractual relationship with us in service of the research.

The results of this research study may be published. You will not be identified in publications without your permission.

This trial may be registered on <https://www.clinicaltrials.gov>, a publicly available registry of clinical trials. This website will not include information that can identify you. At most, the website will include a summary of the results. You can search this website at any time.

### J. WHOM DO I CONTACT IF I HAVE QUESTIONS ABOUT THE RESEARCH STUDY?

If you have questions about the study, please contact your local research investigator or study staff as listed below:

## Research Consent Form for Non-Clinical Research

Dana-Farber/ Harvard Cancer Center

BIDMC/BCH/BWH/DFCI/MGH/Partners Network Affiliates

OHRS 10.02.2017

### DFCI

- Dr. James Tulsy, PI [Contact Information]
- Julie Goldman, Study Staff [Contact Information]

### MGH

- Dr. Angelo Volandes, [Contact Information]

For questions about your rights as a research participant, please contact a representative of the Office for Human Research Studies at [Insert site name and phone number here] This can include questions about your participation in the study, concerns about the study, a research related injury, or if you feel/felt under pressure to enroll in this research study or to continue to participate in this research study.

### **K. PRIVACY OF PROTECTED HEALTH INFORMATION**

Federal law requires Dana-Farber/Harvard Cancer Center (DF/HCC) and its affiliated research doctors, health care providers, and physician network to protect the privacy of information that identifies you and relates to your past, present, and future physical and mental health conditions (“protected health information”). If you enroll in this research study, your “protected health information” will be used and shared with others as explained below.

#### **1. What protected health information about me will be used or shared with others during this research?**

- Existing medical records, including mental health records.
- New health information created from study-related tests, procedures, visits, and/or questionnaires

#### **2. Why will protected information about me be used or shared with others?**

The main reasons include the following:

- To conduct and oversee the research described earlier in this form;
- To ensure the research meets legal, institutional, and accreditation requirements;

## Research Consent Form for Non-Clinical Research

Dana-Farber/ Harvard Cancer Center

BIDMC/BCH/BWH/DFCI/MGH/Partners Network Affiliates

OHRs 10.02.2017

- To conduct public health activities (including reporting of adverse events or situations where you or others may be at risk of harm); and
- To provide the study sponsor with information arising from an adverse event or other event that relates to the safety or toxicity of the drug(s) used in the study and for the purpose of this or other research relating the study drug and its use in cancer; and,
- To better understand the diseases being studied and to improve the design of future studies; and,
- Other reasons may include for treatment, payment, or health care operations. For example, some medical information produced by this research study may become part of your hospital medical record because the information may be necessary for your medical care. (You will also be given a notice for use and sharing of protected health information.)

### 3. Who will use or share protected health information about me?

- DF/HCC and its affiliated research doctors and entities participating in the research will use and share your protected health information. In addition, other DF/HCC offices that deal with research oversight, billing or quality assurance will be able to use and share your protected health information.

### 4. With whom outside of DF/HCC may my protected health information be shared?

While all reasonable efforts will be made to protect the confidentiality of your protected health information, it may also be shared with the following entities:

- Outside individuals or entities that have a need to access this information to perform functions relating to the conduct of this research such as analysis by outside laboratories on behalf of DF/HCC and its affiliates (for example, data storage companies, insurers, or legal advisors).
- The sponsor(s) of the study, its subcontractors, representatives, business partners, and its agent(s): NIH
- Other research doctors and medical centers participating in this research, if applicable
- Federal and state agencies (for example, the Department of Health and Human Services, the Food and Drug Administration, the National



## Research Consent Form for Non-Clinical Research

Dana-Farber/ Harvard Cancer Center

BIDMC/BCH/BWH/DFCI/MGH/Partners Network Affiliates

OHRs 10.02.2017

Institutes of Health, and/or the Office for Human Research Protections), or other domestic or foreign government bodies if required by law and/or necessary for oversight purposes.

- Hospital accrediting agencies
- A data safety monitoring board organized to oversee this research, if applicable

Some who may receive your protected health information may not have to satisfy the privacy rules and requirements. They, in fact, may share your information with others without your permission.

### 5. For how long will protected health information about me be used or shared with others?

- There is no scheduled date at which your protected health information that is being used or shared for this research will be destroyed, because research is an ongoing process.

### 6. Statement of privacy rights:

- You have the right to withdraw your permission for the research doctors and participating DF/HCC entities to use or share your protected health information. We will not be able to withdraw all the information that already has been used or shared with others to carry out related activities such as oversight, or that is needed to ensure quality of the study. To withdraw your permission, you must do so in writing by contacting the researcher listed above in the section: "Whom do I contact if I have questions about the research study?"
- You have the right to request access to your protected health information that is used or shared during this research and that is related to your treatment or payment for your treatment, but you may access this information only after the study is completed. To request this information, please contact the researcher listed above in the section: "Whom do I contact if I have questions about the research study?"

## Research Consent Form for Non-Clinical Research

Dana-Farber/ Harvard Cancer Center

BIDMC/BCH/BWH/DFCI/MGH/Partners Network Affiliates

OHRs 10.02.2017

### **L. CONSENT TO OPTIONAL RESEARCH STUDIES:**

You are being asked to participate in some optional studies. If you decide not to participate in any of the optional studies, you can still participate in the main research study. Please take your time to make your decision and discuss it with others and your primary care physician.

Your participation in these optional research studies is voluntary, and you will not be penalized or lose any benefits if you refuse to participate or decide to stop.

#### Optional Study #1:

We can share your declaration video with you if you wish to have a copy of it. There are multiple ways we can share your declaration video with you. The options available to you are dependent on the site where you receive your medical care. The safest and most secure way to share the video is either through an encrypted flash drive or through a tool called Dropbox for Business.

- ┌ Option 1: We can put your declaration video on an encrypted flash drive which is password protected and provide the flash drive to you; or
- ┌ Option 2: We can post your declaration video on a website called Dropbox for Business. You would be provided web link to view your video online. Dana-Farber has more privacy control over this site and can remove your video at any time. Dropbox for Business would require you to follow multiple steps to view your video.

If you prefer to not use Dropbox for Business or receive through an encrypted flash drive, we can still share your declaration video with you.

- ┌ Option 3: We can put your declaration video on an unencrypted flash drive which is not password protected and provide the flash drive to you; or
- ┌ Option 4: We can post your declaration video on a YouTube unlisted video setting under the study's YouTube account and provide the web link to you. An unlisted video can only be seen and shared by a web link. The

## Research Consent Form for Non-Clinical Research

Dana-Farber/ Harvard Cancer Center

BIDMC/BCH/BWH/DFCI/MGH/Partners Network Affiliates

OHRS 10.02.2017

unlisted video should not be available on YouTube's search results or for people who do not have access to the web link. YouTube is user friendly, and would not require multiple steps to view your video

Please note, for Option 3 and Option 4, we cannot guarantee the confidentiality of your information. For example:

- a. If you lose the unencrypted flash drive it may be recovered and accessible by someone else; or
- b. If the YouTube web link is shared with another person, it may be possible for that person to post your unlisted video to a public playlist or to re-disclose the web link which would then be accessible by others.

I understand if my health information is disclosed to the media or the general public pursuant to this authorization, it is no longer protected by federal or state privacy regulations and may be re-disclosed by the recipient. I further understand that once such materials are in the possession of media or members of the general public, Dana-Farber will have no control over their use.

Please indicate whether or not you want to take part in this optional research study. If you would like to participate in this optional study and receive a copy of your video declaration, please indicate below and also check off the method above which you would like to receive it by.

Not applicable

Yes \_\_\_\_\_ Initials \_\_\_\_\_ Date

No \_\_\_\_\_ Initials \_\_\_\_\_ Date

**Research Consent Form for Non-Clinical Research**

Dana-Farber/ Harvard Cancer Center

BIDMC/BCH/BWH/DFCI/MGH/Partners Network Affiliates

OHRS 10.02.2017

Optional Study #2:

There are times when the research team would like to share patients' videos with their colleagues, in scientific presentations or to train study staff. Would you be comfortable in sharing your video publicly for purposes like this? The risk is that the video could be widely shared, depending on the venue, and we will not have any control over this. We will not be analyzing anything so there will be no results.

I understand if my health information is disclosed to the media or the general public pursuant to this authorization, it is no longer protected by federal or state privacy regulations and may be re-disclosed by the recipient. I further understand that once such materials are in the possession of media or members of the general public, Dana-Farber will have no control over their use.

Please indicate whether or not you want to take part in this optional research study.

 Not applicable Yes \_\_\_\_\_ Initials \_\_\_\_\_ Date No \_\_\_\_\_ Initials \_\_\_\_\_ Date

**Research Consent Form for Non-Clinical Research**

Dana-Farber/ Harvard Cancer Center

BIDMC/BCH/BWH/DFCI/MGH/Partners Network Affiliates

OHRS 10.02.2017

**N. Documentation of Consent**

My signature below indicates:

- I have had enough time to read the consent and think about participating in this study;
- I have had all of my questions answered to my satisfaction;
- I am willing to participate in this study;
- I have been told that my participation is voluntary and I can withdraw at any time

\_\_\_\_\_  
Signature of Participant  
or Legally Authorized Representative

\_\_\_\_\_  
Date

\_\_\_\_\_  
Relationship of Legally Authorized Representative to Participant

## Research Consent Form for Non-Clinical Research

Dana-Farber/ Harvard Cancer Center

BIDMC/BCH/BWH/DFCI/MGH/Partners Network Affiliates

OHRS 10.02.2017

### Adult Participants

#### To be completed by person obtaining consent:

The consent discussion was initiated on \_\_\_\_\_ (date).

Signature of individual obtaining consent: \_\_\_\_\_

Printed name of above: \_\_\_\_\_

Date: \_\_\_\_\_

- A copy of this signed consent form will be given to the participant or legally authorized representative, or, where the participant is a minor, the participant's parent or legal guardian.

#### For Adult Participants

- 1) The participant is an adult and provided consent to participate.
- 1a) Participant (or legally authorized representative) is a non-English speaker and signed the translated Short Form in lieu of English consent document:

*As someone who understands both English and the language spoken by the participant, I interpreted and/or witnessed, in the participant's language, the researcher's presentation of the English consent form. The participant was given the opportunity to ask questions.*

Signature of Interpreter/Witness: \_\_\_\_\_

Printed Name of Interpreter/Witness: \_\_\_\_\_

Date: \_\_\_\_\_

- 1b) Participant is physically unable to sign the consent form because:
- The participant is illiterate.
- The participant has a physical disability.
- Other (please describe): \_\_\_\_\_

*The consent form was read to the participant who was given the opportunity to ask questions and who communicated agreement to participate in the research.*

Signature of Witness: \_\_\_\_\_

Printed Name of Witness: \_\_\_\_\_

Date: \_\_\_\_\_

# Reporting checklist for protocol of a clinical trial.

Based on the SPIRIT guidelines.

## Instructions to authors

Complete this checklist by entering the page numbers from your manuscript where readers will find each of the items listed below.

Your article may not currently address all the items on the checklist. Please modify your text to include the missing information. If you are certain that an item does not apply, please write "n/a" and provide a short explanation.

Upload your completed checklist as an extra file when you submit to a journal.

In your methods section, say that you used the SPIRIT reporting guidelines, and cite them as:

Chan A-W, Tetzlaff JM, Altman DG, Laupacis A, Gøtzsche PC, Krleža-Jerić K, Hróbjartsson A, Mann H, Dickersin K, Berlin J, Doré C, Parulekar W, Summerskill W, Groves T, Schulz K, Sox H, Rockhold FW, Rennie D, Moher D. SPIRIT 2013 Statement: Defining standard protocol items for clinical trials. *Ann Intern Med.* 2013;158(3):200-207

|                                   | Reporting Item                                                                                                                  | Page Number |
|-----------------------------------|---------------------------------------------------------------------------------------------------------------------------------|-------------|
| <b>Administrative information</b> |                                                                                                                                 |             |
| Title                             | <a href="#">#1</a> Descriptive title identifying the study design, population, interventions, and, if applicable, trial acronym | 1           |
| Trial registration                | <a href="#">#2a</a> Trial identifier and registry name. If not yet registered, name of intended registry                        | 19          |
| Trial registration: data set      | <a href="#">#2b</a> All items from the World Health Organization Trial Registration Data Set                                    | 1, 19       |
| Protocol version                  | <a href="#">#3</a> Date and version identifier                                                                                  | 2           |
| Funding                           | <a href="#">#4</a> Sources and types of financial, material, and other support                                                  | 2           |

|    |                      |                     |                                                  |          |
|----|----------------------|---------------------|--------------------------------------------------|----------|
| 1  | Roles and            | <a href="#">#5a</a> | Names, affiliations, and roles of protocol       | 1, 22-23 |
| 2  | responsibilities:    |                     | contributors                                     |          |
| 3  | contributorship      |                     |                                                  |          |
| 4  |                      |                     |                                                  |          |
| 5  |                      |                     |                                                  |          |
| 6  | Roles and            | <a href="#">#5b</a> | Name and contact information for the trial       | 1        |
| 7  | responsibilities:    |                     | sponsor                                          |          |
| 8  | sponsor contact      |                     |                                                  |          |
| 9  | information          |                     |                                                  |          |
| 10 |                      |                     |                                                  |          |
| 11 |                      |                     |                                                  |          |
| 12 |                      |                     |                                                  |          |
| 13 | Roles and            | <a href="#">#5c</a> | Role of study sponsor and funders, if any, in    | 2        |
| 14 | responsibilities:    |                     | study design; collection, management,            |          |
| 15 | sponsor and funder   |                     | analysis, and interpretation of data; writing    |          |
| 16 |                      |                     | of the report; and the decision to submit the    |          |
| 17 |                      |                     | report for publication, including whether        |          |
| 18 |                      |                     | they will have ultimate authority over any of    |          |
| 19 |                      |                     | these activities                                 |          |
| 20 |                      |                     |                                                  |          |
| 21 |                      |                     |                                                  |          |
| 22 |                      |                     |                                                  |          |
| 23 |                      |                     |                                                  |          |
| 24 | Roles and            | <a href="#">#5d</a> | Composition, roles, and responsibilities of      | 20       |
| 25 | responsibilities:    |                     | the coordinating centre, steering committee,     |          |
| 26 | committees           |                     | endpoint adjudication committee, data            |          |
| 27 |                      |                     | management team, and other individuals or        |          |
| 28 |                      |                     | groups overseeing the trial, if applicable (see  |          |
| 29 |                      |                     | Item 21a for data monitoring committee)          |          |
| 30 |                      |                     |                                                  |          |
| 31 |                      |                     |                                                  |          |
| 32 |                      |                     |                                                  |          |
| 33 |                      |                     |                                                  |          |
| 34 | <b>Introduction</b>  |                     |                                                  |          |
| 35 |                      |                     |                                                  |          |
| 36 | Background and       | <a href="#">#6a</a> | Description of research question and             | 5-6      |
| 37 | rationale            |                     | justification for undertaking the trial,         |          |
| 38 |                      |                     | including summary of relevant studies            |          |
| 39 |                      |                     | (published and unpublished) examining            |          |
| 40 |                      |                     | benefits and harms for each intervention         |          |
| 41 |                      |                     |                                                  |          |
| 42 |                      |                     |                                                  |          |
| 43 |                      |                     |                                                  |          |
| 44 |                      |                     |                                                  |          |
| 45 | Background and       | <a href="#">#6b</a> | Explanation for choice of comparators            | 6-8      |
| 46 | rationale: choice of |                     |                                                  |          |
| 47 | comparators          |                     |                                                  |          |
| 48 |                      |                     |                                                  |          |
| 49 |                      |                     |                                                  |          |
| 50 | Objectives           | <a href="#">#7</a>  | Specific objectives or hypotheses                | 6        |
| 51 |                      |                     |                                                  |          |
| 52 | Trial design         | <a href="#">#8</a>  | Description of trial design including type of    | 6        |
| 53 |                      |                     | trial (eg, parallel group, crossover, factorial, |          |
| 54 |                      |                     | single group), allocation ratio, and             |          |
| 55 |                      |                     | framework (eg, superiority, equivalence,         |          |
| 56 |                      |                     | non-inferiority, exploratory)                    |          |
| 57 |                      |                     |                                                  |          |
| 58 |                      |                     |                                                  |          |
| 59 |                      |                     |                                                  |          |
| 60 |                      |                     |                                                  |          |



1 **Methods:**

2 **Participants,**

3 **interventions, and**

4 **outcomes**

|    |                      |                      |                                                                                                                                                                                                                                                                                         |
|----|----------------------|----------------------|-----------------------------------------------------------------------------------------------------------------------------------------------------------------------------------------------------------------------------------------------------------------------------------------|
| 5  |                      |                      |                                                                                                                                                                                                                                                                                         |
| 6  |                      |                      |                                                                                                                                                                                                                                                                                         |
| 7  |                      |                      |                                                                                                                                                                                                                                                                                         |
| 8  | Study setting        | <a href="#">#9</a>   | Description of study settings (eg, community 7-8<br>clinic, academic hospital) and list of<br>countries where data will be collected.<br>Reference to where list of study sites can be<br>obtained                                                                                      |
| 9  |                      |                      |                                                                                                                                                                                                                                                                                         |
| 10 |                      |                      |                                                                                                                                                                                                                                                                                         |
| 11 |                      |                      |                                                                                                                                                                                                                                                                                         |
| 12 |                      |                      |                                                                                                                                                                                                                                                                                         |
| 13 |                      |                      |                                                                                                                                                                                                                                                                                         |
| 14 |                      |                      |                                                                                                                                                                                                                                                                                         |
| 15 |                      |                      |                                                                                                                                                                                                                                                                                         |
| 16 | Eligibility criteria | <a href="#">#10</a>  | Inclusion and exclusion criteria for 8-9<br>participants. If applicable, eligibility criteria<br>for study centres and individuals who will<br>perform the interventions (eg, surgeons,<br>psychotherapists)                                                                            |
| 17 |                      |                      |                                                                                                                                                                                                                                                                                         |
| 18 |                      |                      |                                                                                                                                                                                                                                                                                         |
| 19 |                      |                      |                                                                                                                                                                                                                                                                                         |
| 20 |                      |                      |                                                                                                                                                                                                                                                                                         |
| 21 |                      |                      |                                                                                                                                                                                                                                                                                         |
| 22 |                      |                      |                                                                                                                                                                                                                                                                                         |
| 23 |                      |                      |                                                                                                                                                                                                                                                                                         |
| 24 | Interventions:       | <a href="#">#11a</a> | Interventions for each group with sufficient 7, 9-11<br>description detail to allow replication, including how<br>and when they will be administered                                                                                                                                    |
| 25 |                      |                      |                                                                                                                                                                                                                                                                                         |
| 26 |                      |                      |                                                                                                                                                                                                                                                                                         |
| 27 |                      |                      |                                                                                                                                                                                                                                                                                         |
| 28 |                      |                      |                                                                                                                                                                                                                                                                                         |
| 29 |                      |                      |                                                                                                                                                                                                                                                                                         |
| 30 | Interventions:       | <a href="#">#11b</a> | Criteria for discontinuing or modifying 9-11<br>modifications allocated interventions for a given trial<br>participant (eg, drug dose change in response<br>to harms, participant request, or improving /<br>worsening disease)                                                         |
| 31 |                      |                      |                                                                                                                                                                                                                                                                                         |
| 32 |                      |                      |                                                                                                                                                                                                                                                                                         |
| 33 |                      |                      |                                                                                                                                                                                                                                                                                         |
| 34 |                      |                      |                                                                                                                                                                                                                                                                                         |
| 35 |                      |                      |                                                                                                                                                                                                                                                                                         |
| 36 |                      |                      |                                                                                                                                                                                                                                                                                         |
| 37 |                      |                      |                                                                                                                                                                                                                                                                                         |
| 38 | Interventions:       | <a href="#">#11c</a> | Strategies to improve adherence to 9-11<br>adherence intervention protocols, and any procedures<br>for monitoring adherence (eg, drug tablet<br>return; laboratory tests)                                                                                                               |
| 39 |                      |                      |                                                                                                                                                                                                                                                                                         |
| 40 |                      |                      |                                                                                                                                                                                                                                                                                         |
| 41 |                      |                      |                                                                                                                                                                                                                                                                                         |
| 42 |                      |                      |                                                                                                                                                                                                                                                                                         |
| 43 |                      |                      |                                                                                                                                                                                                                                                                                         |
| 44 |                      |                      |                                                                                                                                                                                                                                                                                         |
| 45 | Interventions:       | <a href="#">#11d</a> | Relevant concomitant care and interventions <i>N/A: Patients are receiving the</i><br>concomitant care that are permitted or prohibited during the <i>standard of care, non-controlled</i><br>trial <i>trial.</i>                                                                       |
| 46 |                      |                      |                                                                                                                                                                                                                                                                                         |
| 47 |                      |                      |                                                                                                                                                                                                                                                                                         |
| 48 |                      |                      |                                                                                                                                                                                                                                                                                         |
| 49 |                      |                      |                                                                                                                                                                                                                                                                                         |
| 50 | Outcomes             | <a href="#">#12</a>  | Primary, secondary, and other outcomes, 12-13<br>including the specific measurement variable<br>(eg, systolic blood pressure), analysis metric<br>(eg, change from baseline, final value, time<br>to event), method of aggregation (eg,<br>median, proportion), and time point for each |
| 51 |                      |                      |                                                                                                                                                                                                                                                                                         |
| 52 |                      |                      |                                                                                                                                                                                                                                                                                         |
| 53 |                      |                      |                                                                                                                                                                                                                                                                                         |
| 54 |                      |                      |                                                                                                                                                                                                                                                                                         |
| 55 |                      |                      |                                                                                                                                                                                                                                                                                         |
| 56 |                      |                      |                                                                                                                                                                                                                                                                                         |
| 57 |                      |                      |                                                                                                                                                                                                                                                                                         |
| 58 |                      |                      |                                                                                                                                                                                                                                                                                         |
| 59 |                      |                      |                                                                                                                                                                                                                                                                                         |
| 60 |                      |                      |                                                                                                                                                                                                                                                                                         |

1 outcome. Explanation of the clinical  
 2 relevance of chosen efficacy and harm  
 3 outcomes is strongly recommended  
 4

5 Participant timeline [#13](#) Time schedule of enrolment, interventions 7-8, See Figure 3a,b  
 6 (including any run-ins and washouts),  
 7 assessments, and visits for participants. A  
 8 schematic diagram is highly recommended  
 9 (see Figure)  
 10  
 11  
 12

13 Sample size [#14](#) Estimated number of participants needed to 18-19  
 14 achieve study objectives and how it was  
 15 determined, including clinical and statistical  
 16 assumptions supporting any sample size  
 17 calculations  
 18  
 19  
 20

21 Recruitment [#15](#) Strategies for achieving adequate participant *N/A: In this pragmatic trial, all*  
 22 enrolment to reach target sample size *individuals who meet criteria*  
 23 *and do not opt out are included*  
 24 *in the analysis rather than*  
 25 *individual patient recruitment.*  
 26 *We have included the*  
 27 *description of our population on*  
 28 *page 8.*  
 29  
 30  
 31  
 32  
 33  
 34

### 35 **Methods:**

#### 36 **Assignment of** 37 **interventions (for** 38 **controlled trials)** 39 40

41 Allocation: [#16a](#) Method of generating the allocation 7-8  
 42 sequence generation sequence (eg, computer-generated random  
 43 numbers), and list of any factors for  
 44 stratification. To reduce predictability of a  
 45 random sequence, details of any planned  
 46 restriction (eg, blocking) should be provided  
 47 in a separate document that is unavailable to  
 48 those who enrol participants or assign  
 49 interventions  
 50  
 51  
 52  
 53  
 54  
 55  
 56  
 57  
 58  
 59  
 60

|    |                        |                      |                                                |                                        |
|----|------------------------|----------------------|------------------------------------------------|----------------------------------------|
| 1  | Allocation             | <a href="#">#16b</a> | Mechanism of implementing the allocation       | 7-8                                    |
| 2  | concealment            |                      | sequence (eg, central telephone; sequentially  |                                        |
| 3  | mechanism              |                      | numbered, opaque, sealed envelopes),           |                                        |
| 4  |                        |                      | describing any steps to conceal the sequence   |                                        |
| 5  |                        |                      | until interventions are assigned               |                                        |
| 6  |                        |                      |                                                |                                        |
| 7  |                        |                      |                                                |                                        |
| 8  |                        |                      |                                                |                                        |
| 9  | Allocation:            | <a href="#">#16c</a> | Who will generate the allocation sequence,     | 7-9                                    |
| 10 | implementation         |                      | who will enrol participants, and who will      |                                        |
| 11 |                        |                      | assign participants to interventions           |                                        |
| 12 |                        |                      |                                                |                                        |
| 13 |                        |                      |                                                |                                        |
| 14 | Blinding (masking)     | <a href="#">#17a</a> | Who will be blinded after assignment to        | 15                                     |
| 15 |                        |                      | interventions (eg, trial participants, care    |                                        |
| 16 |                        |                      | providers, outcome assessors, data analysts),  |                                        |
| 17 |                        |                      | and how                                        |                                        |
| 18 |                        |                      |                                                |                                        |
| 19 |                        |                      |                                                |                                        |
| 20 |                        |                      |                                                |                                        |
| 21 | Blinding (masking):    | <a href="#">#17b</a> | If blinded, circumstances under which          | 15                                     |
| 22 | emergency              |                      | unblinding is permissible, and procedure for   |                                        |
| 23 | unblinding             |                      | revealing a participant's allocated            |                                        |
| 24 |                        |                      | intervention during the trial                  |                                        |
| 25 |                        |                      |                                                |                                        |
| 26 |                        |                      |                                                |                                        |
| 27 |                        |                      |                                                |                                        |
| 28 | <b>Methods: Data</b>   |                      |                                                |                                        |
| 29 | <b>collection,</b>     |                      |                                                |                                        |
| 30 | <b>management, and</b> |                      |                                                |                                        |
| 31 | <b>analysis</b>        |                      |                                                |                                        |
| 32 |                        |                      |                                                |                                        |
| 33 |                        |                      |                                                |                                        |
| 34 |                        |                      |                                                |                                        |
| 35 | Data collection plan   | <a href="#">#18a</a> | Plans for assessment and collection of         | 8-9, 12-15                             |
| 36 |                        |                      | outcome, baseline, and other trial data,       |                                        |
| 37 |                        |                      | including any related processes to promote     |                                        |
| 38 |                        |                      | data quality (eg, duplicate measurements,      |                                        |
| 39 |                        |                      | training of assessors) and a description of    |                                        |
| 40 |                        |                      | study instruments (eg, questionnaires,         |                                        |
| 41 |                        |                      | laboratory tests) along with their reliability |                                        |
| 42 |                        |                      | and validity, if known. Reference to where     |                                        |
| 43 |                        |                      | data collection forms can be found, if not in  |                                        |
| 44 |                        |                      | the protocol                                   |                                        |
| 45 |                        |                      |                                                |                                        |
| 46 |                        |                      |                                                |                                        |
| 47 |                        |                      |                                                |                                        |
| 48 |                        |                      |                                                |                                        |
| 49 |                        |                      |                                                |                                        |
| 50 |                        |                      |                                                |                                        |
| 51 | Data collection        | <a href="#">#18b</a> | Plans to promote participant retention and     | <i>N/A; The unit of randomization</i>  |
| 52 | plan: retention        |                      | complete follow-up, including list of any      | <i>is the clinic and all eligible</i>  |
| 53 |                        |                      | outcome data to be collected for participants  | <i>individuals who do not choose</i>   |
| 54 |                        |                      | who discontinue or deviate from intervention   | <i>to opt out are included and are</i> |
| 55 |                        |                      | protocols                                      | <i>not followed up over time.</i>      |
| 56 |                        |                      |                                                |                                        |
| 57 |                        |                      |                                                |                                        |
| 58 |                        |                      |                                                |                                        |
| 59 |                        |                      |                                                |                                        |
| 60 |                        |                      |                                                |                                        |

|    |                                                  |                      |                                                                                                                                                                                                                                                                                                                                       |           |
|----|--------------------------------------------------|----------------------|---------------------------------------------------------------------------------------------------------------------------------------------------------------------------------------------------------------------------------------------------------------------------------------------------------------------------------------|-----------|
| 1  | Data management                                  | <a href="#">#19</a>  | Plans for data entry, coding, security, and storage, including any related processes to promote data quality (eg, double data entry; range checks for data values). Reference to where details of data management procedures can be found, if not in the protocol                                                                     | 8, 13-15  |
| 2  |                                                  |                      |                                                                                                                                                                                                                                                                                                                                       |           |
| 3  |                                                  |                      |                                                                                                                                                                                                                                                                                                                                       |           |
| 4  |                                                  |                      |                                                                                                                                                                                                                                                                                                                                       |           |
| 5  |                                                  |                      |                                                                                                                                                                                                                                                                                                                                       |           |
| 6  |                                                  |                      |                                                                                                                                                                                                                                                                                                                                       |           |
| 7  |                                                  |                      |                                                                                                                                                                                                                                                                                                                                       |           |
| 8  |                                                  |                      |                                                                                                                                                                                                                                                                                                                                       |           |
| 9  |                                                  |                      |                                                                                                                                                                                                                                                                                                                                       |           |
| 10 |                                                  |                      |                                                                                                                                                                                                                                                                                                                                       |           |
| 11 |                                                  |                      |                                                                                                                                                                                                                                                                                                                                       |           |
| 12 | Statistics: outcomes                             | <a href="#">#20a</a> | Statistical methods for analysing primary and secondary outcomes. Reference to where other details of the statistical analysis plan can be found, if not in the protocol                                                                                                                                                              | 15-18     |
| 13 |                                                  |                      |                                                                                                                                                                                                                                                                                                                                       |           |
| 14 |                                                  |                      |                                                                                                                                                                                                                                                                                                                                       |           |
| 15 |                                                  |                      |                                                                                                                                                                                                                                                                                                                                       |           |
| 16 |                                                  |                      |                                                                                                                                                                                                                                                                                                                                       |           |
| 17 |                                                  |                      |                                                                                                                                                                                                                                                                                                                                       |           |
| 18 |                                                  |                      |                                                                                                                                                                                                                                                                                                                                       |           |
| 19 | Statistics: additional analyses                  | <a href="#">#20b</a> | Methods for any additional analyses (eg, subgroup and adjusted analyses)                                                                                                                                                                                                                                                              | 15-18     |
| 20 |                                                  |                      |                                                                                                                                                                                                                                                                                                                                       |           |
| 21 |                                                  |                      |                                                                                                                                                                                                                                                                                                                                       |           |
| 22 |                                                  |                      |                                                                                                                                                                                                                                                                                                                                       |           |
| 23 | Statistics: analysis population and missing data | <a href="#">#20c</a> | Definition of analysis population relating to protocol non-adherence (eg, as randomised analysis), and any statistical methods to handle missing data (eg, multiple imputation)                                                                                                                                                       | 15-18     |
| 24 |                                                  |                      |                                                                                                                                                                                                                                                                                                                                       |           |
| 25 |                                                  |                      |                                                                                                                                                                                                                                                                                                                                       |           |
| 26 |                                                  |                      |                                                                                                                                                                                                                                                                                                                                       |           |
| 27 |                                                  |                      |                                                                                                                                                                                                                                                                                                                                       |           |
| 28 |                                                  |                      |                                                                                                                                                                                                                                                                                                                                       |           |
| 29 |                                                  |                      |                                                                                                                                                                                                                                                                                                                                       |           |
| 30 |                                                  |                      |                                                                                                                                                                                                                                                                                                                                       |           |
| 31 | <b>Methods:</b>                                  |                      |                                                                                                                                                                                                                                                                                                                                       |           |
| 32 | <b>Monitoring</b>                                |                      |                                                                                                                                                                                                                                                                                                                                       |           |
| 33 |                                                  |                      |                                                                                                                                                                                                                                                                                                                                       |           |
| 34 |                                                  |                      |                                                                                                                                                                                                                                                                                                                                       |           |
| 35 | Data monitoring: formal committee                | <a href="#">#21a</a> | Composition of data monitoring committee (DMC); summary of its role and reporting structure; statement of whether it is independent from the sponsor and competing interests; and reference to where further details about its charter can be found, if not in the protocol. Alternatively, an explanation of why a DMC is not needed | 15, 19-20 |
| 36 |                                                  |                      |                                                                                                                                                                                                                                                                                                                                       |           |
| 37 |                                                  |                      |                                                                                                                                                                                                                                                                                                                                       |           |
| 38 |                                                  |                      |                                                                                                                                                                                                                                                                                                                                       |           |
| 39 |                                                  |                      |                                                                                                                                                                                                                                                                                                                                       |           |
| 40 |                                                  |                      |                                                                                                                                                                                                                                                                                                                                       |           |
| 41 |                                                  |                      |                                                                                                                                                                                                                                                                                                                                       |           |
| 42 |                                                  |                      |                                                                                                                                                                                                                                                                                                                                       |           |
| 43 |                                                  |                      |                                                                                                                                                                                                                                                                                                                                       |           |
| 44 |                                                  |                      |                                                                                                                                                                                                                                                                                                                                       |           |
| 45 |                                                  |                      |                                                                                                                                                                                                                                                                                                                                       |           |
| 46 |                                                  |                      |                                                                                                                                                                                                                                                                                                                                       |           |
| 47 |                                                  |                      |                                                                                                                                                                                                                                                                                                                                       |           |
| 48 | Data monitoring: interim analysis                | <a href="#">#21b</a> | Description of any interim analyses and stopping guidelines, including who will have access to these interim results and make the final decision to terminate the trial                                                                                                                                                               | 14        |
| 49 |                                                  |                      |                                                                                                                                                                                                                                                                                                                                       |           |
| 50 |                                                  |                      |                                                                                                                                                                                                                                                                                                                                       |           |
| 51 |                                                  |                      |                                                                                                                                                                                                                                                                                                                                       |           |
| 52 |                                                  |                      |                                                                                                                                                                                                                                                                                                                                       |           |
| 53 |                                                  |                      |                                                                                                                                                                                                                                                                                                                                       |           |
| 54 | Harms                                            | <a href="#">#22</a>  | Plans for collecting, assessing, reporting, and managing solicited and spontaneously                                                                                                                                                                                                                                                  | 19        |
| 55 |                                                  |                      |                                                                                                                                                                                                                                                                                                                                       |           |
| 56 |                                                  |                      |                                                                                                                                                                                                                                                                                                                                       |           |
| 57 |                                                  |                      |                                                                                                                                                                                                                                                                                                                                       |           |
| 58 |                                                  |                      |                                                                                                                                                                                                                                                                                                                                       |           |
| 59 |                                                  |                      |                                                                                                                                                                                                                                                                                                                                       |           |
| 60 |                                                  |                      |                                                                                                                                                                                                                                                                                                                                       |           |

|    |                                      |                                                                                                                                                                                                                                                        |              |
|----|--------------------------------------|--------------------------------------------------------------------------------------------------------------------------------------------------------------------------------------------------------------------------------------------------------|--------------|
|    |                                      | reported adverse events and other unintended effects of trial interventions or trial conduct                                                                                                                                                           |              |
| 1  |                                      |                                                                                                                                                                                                                                                        |              |
| 2  |                                      |                                                                                                                                                                                                                                                        |              |
| 3  |                                      |                                                                                                                                                                                                                                                        |              |
| 4  | Auditing                             | <a href="#">#23</a> Frequency and procedures for auditing trial conduct, if any, and whether the process will be independent from investigators and the sponsor                                                                                        | 19-20        |
| 5  |                                      |                                                                                                                                                                                                                                                        |              |
| 6  |                                      |                                                                                                                                                                                                                                                        |              |
| 7  |                                      |                                                                                                                                                                                                                                                        |              |
| 8  |                                      |                                                                                                                                                                                                                                                        |              |
| 9  |                                      |                                                                                                                                                                                                                                                        |              |
| 10 |                                      |                                                                                                                                                                                                                                                        |              |
| 11 | <b>Ethics and</b>                    |                                                                                                                                                                                                                                                        |              |
| 12 | <b>dissemination</b>                 |                                                                                                                                                                                                                                                        |              |
| 13 |                                      |                                                                                                                                                                                                                                                        |              |
| 14 |                                      |                                                                                                                                                                                                                                                        |              |
| 15 | Research ethics approval             | <a href="#">#24</a> Plans for seeking research ethics committee / institutional review board (REC / IRB) approval                                                                                                                                      | 19-20        |
| 16 |                                      |                                                                                                                                                                                                                                                        |              |
| 17 |                                      |                                                                                                                                                                                                                                                        |              |
| 18 |                                      |                                                                                                                                                                                                                                                        |              |
| 19 |                                      |                                                                                                                                                                                                                                                        |              |
| 20 | Protocol amendments                  | <a href="#">#25</a> Plans for communicating important protocol modifications (eg, changes to eligibility criteria, outcomes, analyses) to relevant parties (eg, investigators, REC / IRBs, trial participants, trial registries, journals, regulators) | 19-20        |
| 21 |                                      |                                                                                                                                                                                                                                                        |              |
| 22 |                                      |                                                                                                                                                                                                                                                        |              |
| 23 |                                      |                                                                                                                                                                                                                                                        |              |
| 24 |                                      |                                                                                                                                                                                                                                                        |              |
| 25 |                                      |                                                                                                                                                                                                                                                        |              |
| 26 |                                      |                                                                                                                                                                                                                                                        |              |
| 27 |                                      |                                                                                                                                                                                                                                                        |              |
| 28 |                                      |                                                                                                                                                                                                                                                        |              |
| 29 |                                      |                                                                                                                                                                                                                                                        |              |
| 30 | Consent or assent                    | <a href="#">#26a</a> Who will obtain informed consent or assent from potential trial participants or authorised surrogates, and how (see Item 32)                                                                                                      | 20           |
| 31 |                                      |                                                                                                                                                                                                                                                        |              |
| 32 |                                      |                                                                                                                                                                                                                                                        |              |
| 33 |                                      |                                                                                                                                                                                                                                                        |              |
| 34 |                                      |                                                                                                                                                                                                                                                        |              |
| 35 | Consent or assent: ancillary studies | <a href="#">#26b</a> Additional consent provisions for collection and use of participant data and biological specimens in ancillary studies, if applicable                                                                                             | N/A          |
| 36 |                                      |                                                                                                                                                                                                                                                        |              |
| 37 |                                      |                                                                                                                                                                                                                                                        |              |
| 38 |                                      |                                                                                                                                                                                                                                                        |              |
| 39 |                                      |                                                                                                                                                                                                                                                        |              |
| 40 | Confidentiality                      | <a href="#">#27</a> How personal information about potential and enrolled participants will be collected, shared, and maintained in order to protect confidentiality before, during, and after the trial                                               | 14-15, 19-20 |
| 41 |                                      |                                                                                                                                                                                                                                                        |              |
| 42 |                                      |                                                                                                                                                                                                                                                        |              |
| 43 |                                      |                                                                                                                                                                                                                                                        |              |
| 44 |                                      |                                                                                                                                                                                                                                                        |              |
| 45 |                                      |                                                                                                                                                                                                                                                        |              |
| 46 |                                      |                                                                                                                                                                                                                                                        |              |
| 47 |                                      |                                                                                                                                                                                                                                                        |              |
| 48 |                                      |                                                                                                                                                                                                                                                        |              |
| 49 | Declaration of interests             | <a href="#">#28</a> Financial and other competing interests for principal investigators for the overall trial and each study site                                                                                                                      | 22           |
| 50 |                                      |                                                                                                                                                                                                                                                        |              |
| 51 |                                      |                                                                                                                                                                                                                                                        |              |
| 52 |                                      |                                                                                                                                                                                                                                                        |              |
| 53 |                                      |                                                                                                                                                                                                                                                        |              |
| 54 | Data access                          | <a href="#">#29</a> Statement of who will have access to the final trial dataset, and disclosure of contractual agreements that limit such access for investigators                                                                                    | 15           |
| 55 |                                      |                                                                                                                                                                                                                                                        |              |
| 56 |                                      |                                                                                                                                                                                                                                                        |              |
| 57 |                                      |                                                                                                                                                                                                                                                        |              |
| 58 |                                      |                                                                                                                                                                                                                                                        |              |
| 59 |                                      |                                                                                                                                                                                                                                                        |              |
| 60 |                                      |                                                                                                                                                                                                                                                        |              |

|    |                       |                      |                                                   |                 |
|----|-----------------------|----------------------|---------------------------------------------------|-----------------|
| 1  | Ancillary and post    | <a href="#">#30</a>  | Provisions, if any, for ancillary and post-trial  | <i>N/A</i>      |
| 2  | trial care            |                      | care, and for compensation to those who           |                 |
| 3  |                       |                      | suffer harm from trial participation              |                 |
| 4  |                       |                      |                                                   |                 |
| 5  |                       |                      |                                                   |                 |
| 6  | Dissemination         | <a href="#">#31a</a> | Plans for investigators and sponsor to            | <i>20-21</i>    |
| 7  | policy: trial results |                      | communicate trial results to participants,        |                 |
| 8  |                       |                      | healthcare professionals, the public, and         |                 |
| 9  |                       |                      | other relevant groups (eg, via publication,       |                 |
| 10 |                       |                      | reporting in results databases, or other data     |                 |
| 11 |                       |                      | sharing arrangements), including any              |                 |
| 12 |                       |                      | publication restrictions                          |                 |
| 13 |                       |                      |                                                   |                 |
| 14 |                       |                      |                                                   |                 |
| 15 |                       |                      |                                                   |                 |
| 16 |                       |                      |                                                   |                 |
| 17 | Dissemination         | <a href="#">#31b</a> | Authorship eligibility guidelines and any         | <i>22-23</i>    |
| 18 | policy: authorship    |                      | intended use of professional writers              |                 |
| 19 |                       |                      |                                                   |                 |
| 20 |                       |                      |                                                   |                 |
| 21 | Dissemination         | <a href="#">#31c</a> | Plans, if any, for granting public access to      | <i>N/A</i>      |
| 22 | policy: reproducible  |                      | the full protocol, participant-level dataset,     |                 |
| 23 | research              |                      | and statistical code                              |                 |
| 24 |                       |                      |                                                   |                 |
| 25 |                       |                      |                                                   |                 |
| 26 |                       |                      |                                                   |                 |
| 27 | <b>Appendices</b>     |                      |                                                   |                 |
| 28 |                       |                      |                                                   |                 |
| 29 | Informed consent      | <a href="#">#32</a>  | Model consent form and other related              | <i>Appendix</i> |
| 30 | materials             |                      | documentation given to participants and           |                 |
| 31 |                       |                      | authorised surrogates                             |                 |
| 32 |                       |                      |                                                   |                 |
| 33 |                       |                      |                                                   |                 |
| 34 | Biological            | <a href="#">#33</a>  | Plans for collection, laboratory evaluation,      | <i>N/A</i>      |
| 35 | specimens             |                      | and storage of biological specimens for           |                 |
| 36 |                       |                      | genetic or molecular analysis in the current      |                 |
| 37 |                       |                      | trial and for future use in ancillary studies, if |                 |
| 38 |                       |                      | applicable                                        |                 |
| 39 |                       |                      |                                                   |                 |
| 40 |                       |                      |                                                   |                 |
| 41 |                       |                      |                                                   |                 |
| 42 |                       |                      |                                                   |                 |

None The SPIRIT checklist is distributed under the terms of the Creative Commons Attribution License CC-BY-ND 3.0. This checklist can be completed online using <https://www.goodreports.org/>, a tool made by the [EQUATOR Network](#) in collaboration with [Penelope.ai](#)
