# Supplementary material
Source: PubMed Central journal article supplement (PMC7365491)
Supplement: bmjopen-2020-040999.reviewer_comments.pdf [file bmjopen-2020-040999.reviewer_comments.pdf]

## PEER REVIEW HISTORY

BMJ Open publishes all reviews undertaken for accepted manuscripts. Reviewers are asked to complete a checklist review form (<http://bmjopen.bmj.com/site/about/resources/checklist.pdf>) and are provided with free text boxes to elaborate on their assessment. These free text comments are reproduced below.

## ARTICLE DETAILS

|                            |                                                                                                                                                                                                        |
|----------------------------|--------------------------------------------------------------------------------------------------------------------------------------------------------------------------------------------------------|
| <b>TITLE (PROVISIONAL)</b> | Advance Care Planning: Promoting Effective and Aligned Communication in the Elderly (ACP-PEACE) The study protocol for a pragmatic stepped-wedge trial of older patients with cancer                   |
| <b>AUTHORS</b>             | Lakin, Joshua R; Brannen, Elise; Tulsky, James A; Paasche-Orlow, Michael; Lindvall, Charlotta; Chang, Yuchiao; Gundersen, Daniel A.; El-Jawahri, Areej; ACP Peace Investigators, The; Volandes, Angelo |

This article was not externally reviewed at BMJ Open. Protocols that have been independently assessed prior to submission to BMJ Open are usually fast-tracked to publication on the grounds that further substantial changes will not be possible. This independent assessment will usually be external, independent review for both a substantial grant award from a non-commercial or government funder and ethics approval.
